# Supplementary material
Source: PubMed Central journal article supplement (PMC3107126)

LSJI-2

exp1 s2pul

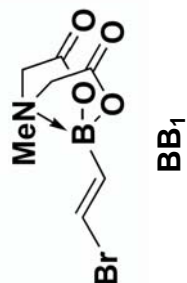

|             |             |            |            |           |
|-------------|-------------|------------|------------|-----------|
| date        | Sep 24 2007 | dfrq       | 499.702    | DEC. & VT |
| solvent     | CD3CN       | dn         | H1         |           |
| file        | exp         | dpwr       | 20         |           |
| ACQUISITION |             | dof        | 0          |           |
| sfrq        | 499.702     | dm         | nmn        |           |
| tn          | H1          | chma       | c          |           |
| at          | 4.665       | dmf        | 200        |           |
| np          | 65536       | dseq       |            |           |
| sw          | 7024.9      | dres       | 1.0        |           |
| fb          | 4000        | homo       | n          |           |
| bs          | 4           | PROCESSING |            |           |
| tpwr        | 63          | lb         | not used   |           |
| pw          | 6.5         | wtfile     |            |           |
| d1          | 0           | proc       | ft         |           |
| tof         | 2.0         | fn         | not used   |           |
| nt          | 16          | math       | f          |           |
| ct          | 16          |            |            |           |
| alock       | n           | werr       |            |           |
| gain        | not used    | wexp       | svf(nl)    |           |
| FLAGS       |             | wbs        |            |           |
| il          | n           | wnt        | wft('acq') |           |
| in          | n           |            |            |           |
| dp          | y           |            |            |           |
| hs          | nn          |            |            |           |
| DISPLAY     |             |            |            |           |
| sp          | 37.6        |            |            |           |
| wp          | 5413.8      |            |            |           |
| vs          | 24          |            |            |           |
| sc          | 0           |            |            |           |
| wc          | 250         |            |            |           |
| hzmm        | 21.66       |            |            |           |
| is          | 1284.05     |            |            |           |
| rfl         | 1997.3      |            |            |           |
| rfp         | 964.4       |            |            |           |
| th          | 7           |            |            |           |
| ins         | 3.000       |            |            |           |
| ai          | ph          |            |            |           |

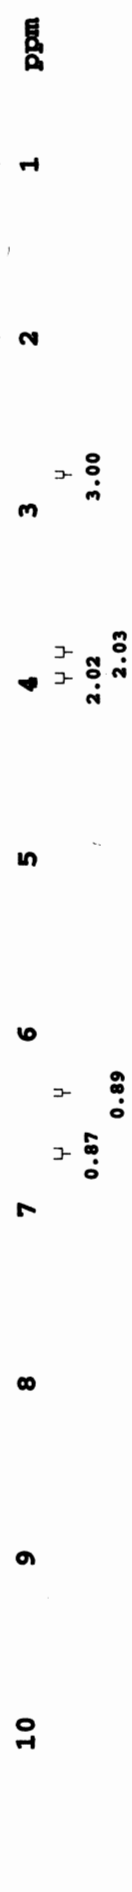

PCH=CBr(1year 5month old)

expl stdlh

|             |            |            |            |
|-------------|------------|------------|------------|
| date        | Sep 4 2007 | dn         | H1         |
| solvent     | CD3CN      | dof        | 0          |
| file        | exp        | dm         | nnn        |
|             | exp        | dm         | c          |
| ACQUISITION |            |            |            |
| sfrq        | 399.953    | dmf        | 200        |
| tn          | H1         | dpwr       | 20         |
| at          | 4.096      | PROCESSING |            |
| np          | 65536      | lb         | not used   |
| sw          | 8000.0     | wtfile     |            |
| fb          | 4400       | proc       | ft         |
| bs          | 16         | fn         | not used   |
| tpwr        | 63         | math       | f          |
| pw          | 5.8        |            |            |
| dl          | 0          | werr       |            |
| tof         | -425.7     | wexp       | svf(nl)    |
| nt          | 16         | wbs        |            |
| ct          | 16         | wnt        | wft('acq') |
| alock       | n          | DISPLAY    |            |
| gain        | not used   | sp         | -4.7       |
| FLAGS       | WP         |            | 4354.1     |
| il          | n          | vs         | 151        |
| in          | n          | sc         | 0          |
| dp          | y          | wc         | 250        |
| hs          | nn         | hzmm       | 17.42      |
|             |            | is         | 1819.24    |
|             |            | rfl        | 2785.2     |
|             |            | rfp        | 771.9      |
|             |            | th         | 20         |
|             |            | ins        | 3.000      |
|             |            | nm         | ph         |

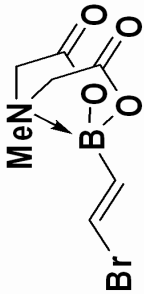

BB<sub>1</sub>

Storage for 1.5 years at 23°C under air

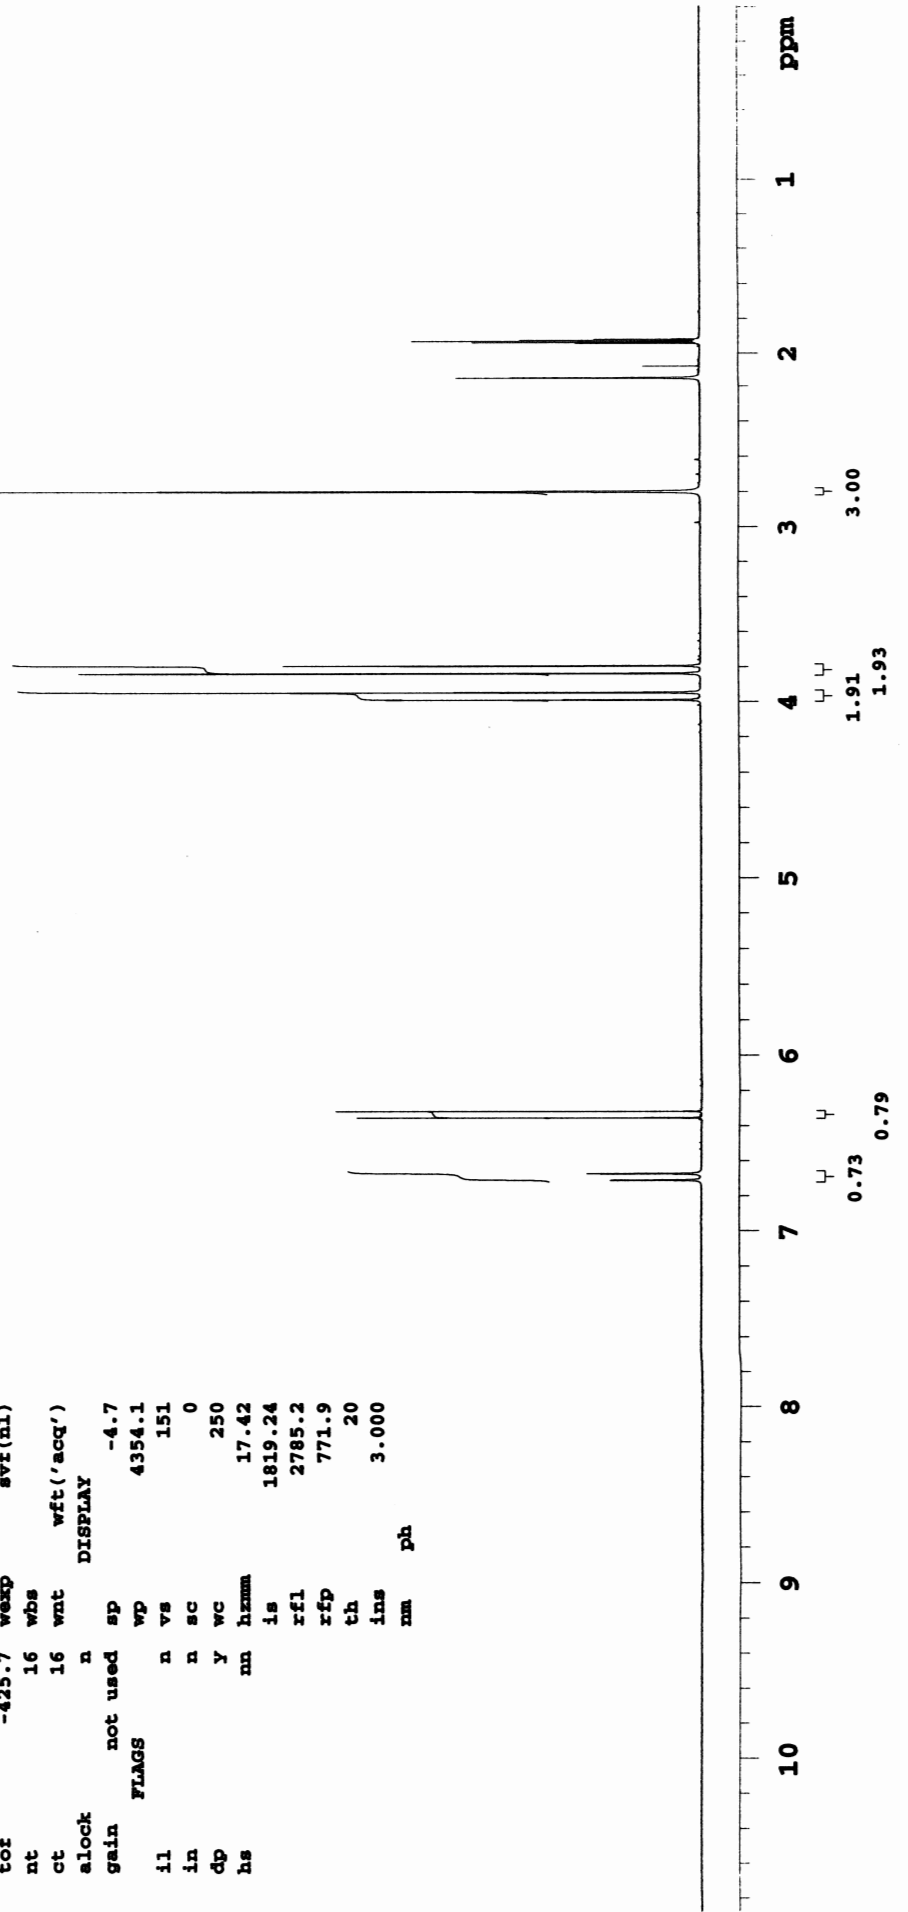

LSJI-2-13C

exp1 s2pul

|             |             |            |          |
|-------------|-------------|------------|----------|
| SAMPLE      |             | DEC. & VT  |          |
| date        | Sep 24 2007 | dfrq       | 499.701  |
| solvent     | CD3CN       | dn         | H1       |
| file        | exp         | dpwr       | 44       |
| ACQUISITION |             | dof        | -827.6   |
| sfrq        | 125.663     | dm         | YFF      |
| tn          | C13         | dmm        | w        |
| at          | 1.086       | dmf        | 12000    |
| np          | 65536       | dseq       |          |
| sw          | 30165.9     | dres       | 90.0     |
| fb          | 16600       | homo       | n        |
| bs          | 16          | PROCESSING |          |
| ss          | 1           | lb         | 1.00     |
| tpwr        | 53          | wtfile     |          |
| pw          | 6.0         | proc       | ft       |
| d1          | 1.000       | fn         | not used |
| tof         | 1884.7      | math       | f        |
| nt          | 7777        |            |          |
| ct          | 2126        | werr       |          |
| alock       | n           | wexp       |          |
| gain        | not used    | wbs        |          |
| FLAGS       |             | wnt        |          |
| il          | n           |            |          |
| in          | n           |            |          |
| dp          | y           |            |          |
| hs          | nn          |            |          |
| DISPLAY     |             |            |          |
| sp          | -1130.1     |            |          |
| vp          | 28588.9     |            |          |
| vs          | 122         |            |          |
| sc          | 0           |            |          |
| wc          | 250         |            |          |
| hzmm        | 114.36      |            |          |
| is          | 500.00      |            |          |
| rfl         | 1336.7      |            |          |
| rfp         | 163.3       |            |          |
| th          | 42          |            |          |
| ins         | 100.000     |            |          |
| nm          | ph          |            |          |

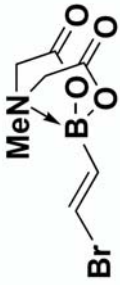

BB<sub>1</sub>

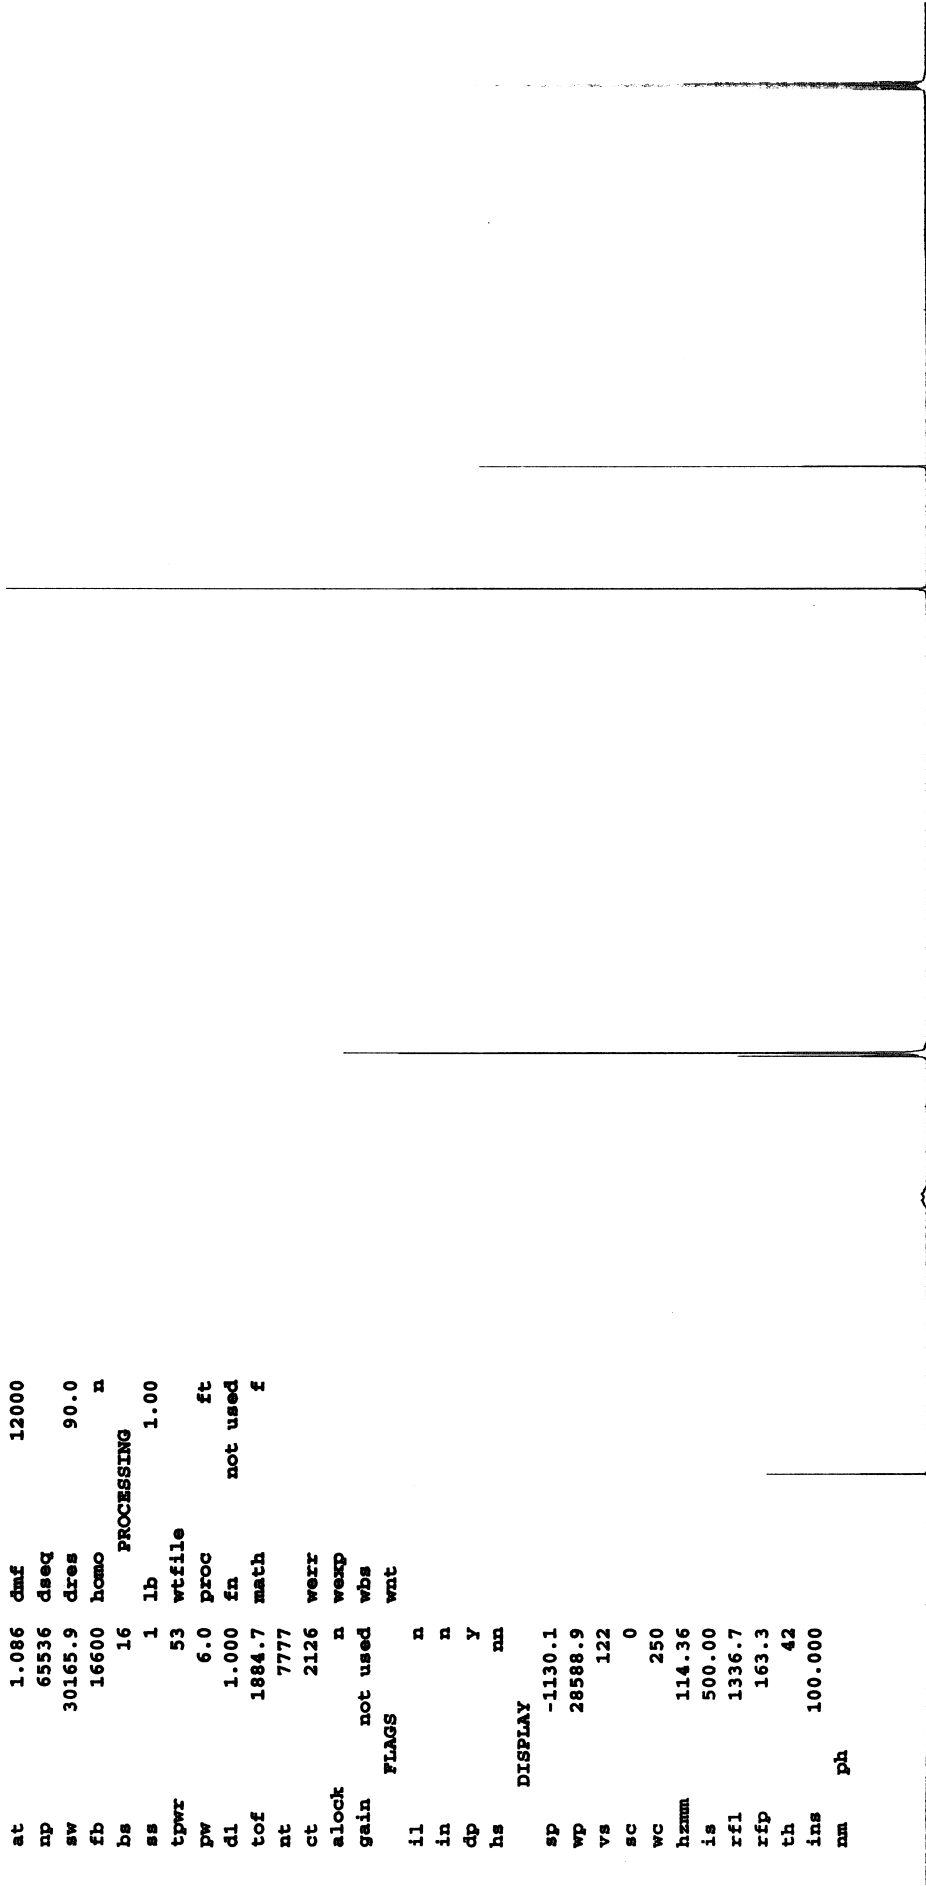

200 180 160 140 120 100 80 60 40 20 ppm

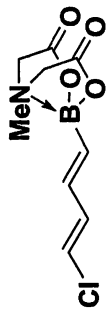

**BB<sub>2</sub>**

<sup>1</sup>H, VXR500, 500 MHz,  
23 °C, CD<sub>3</sub>CN

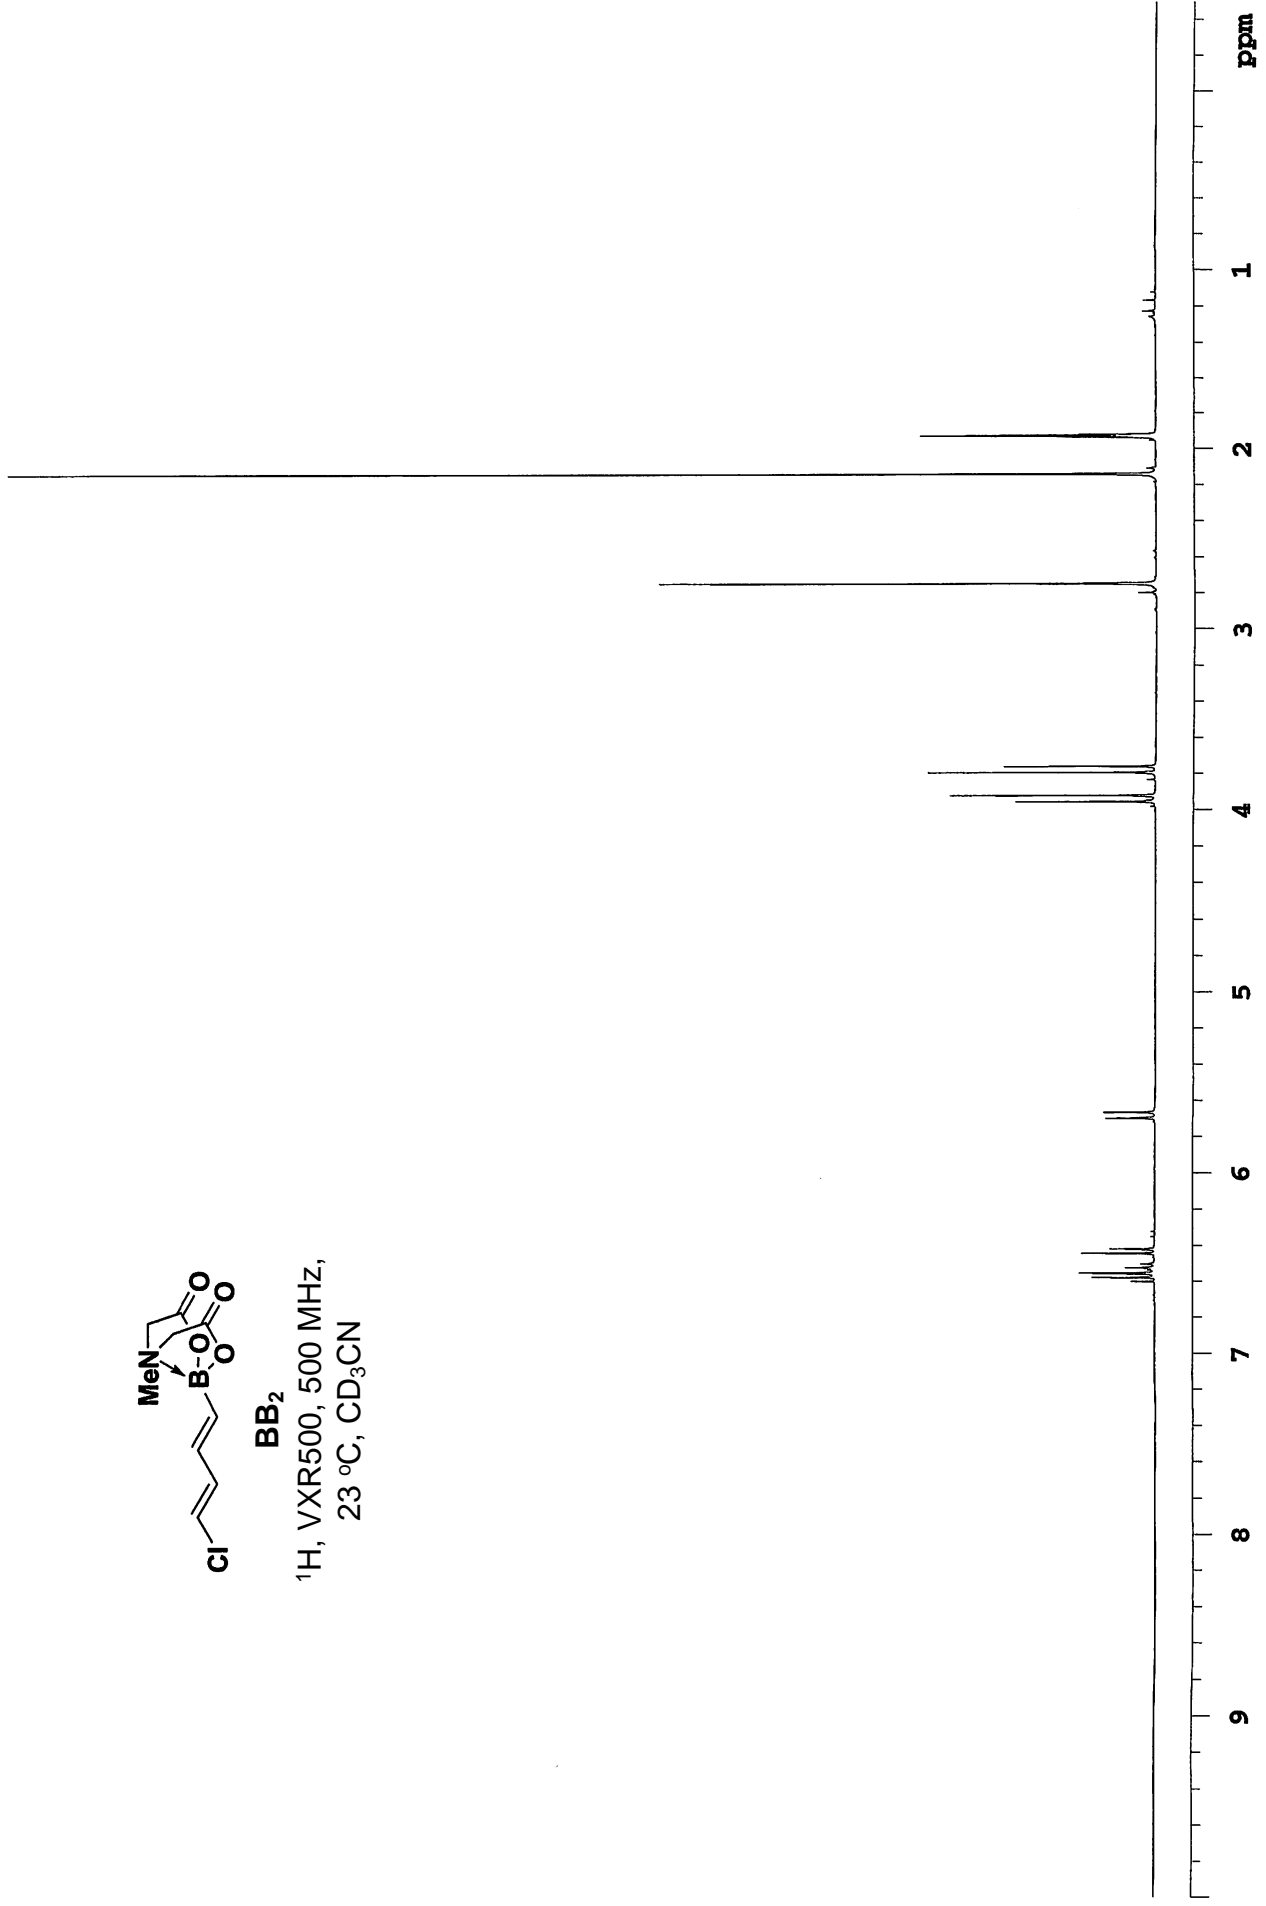

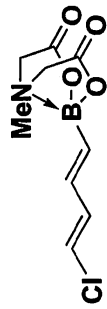

**BB<sub>2</sub>**

<sup>13</sup>C, VXR500, 125 MHz,  
23 °C, CD<sub>3</sub>CN

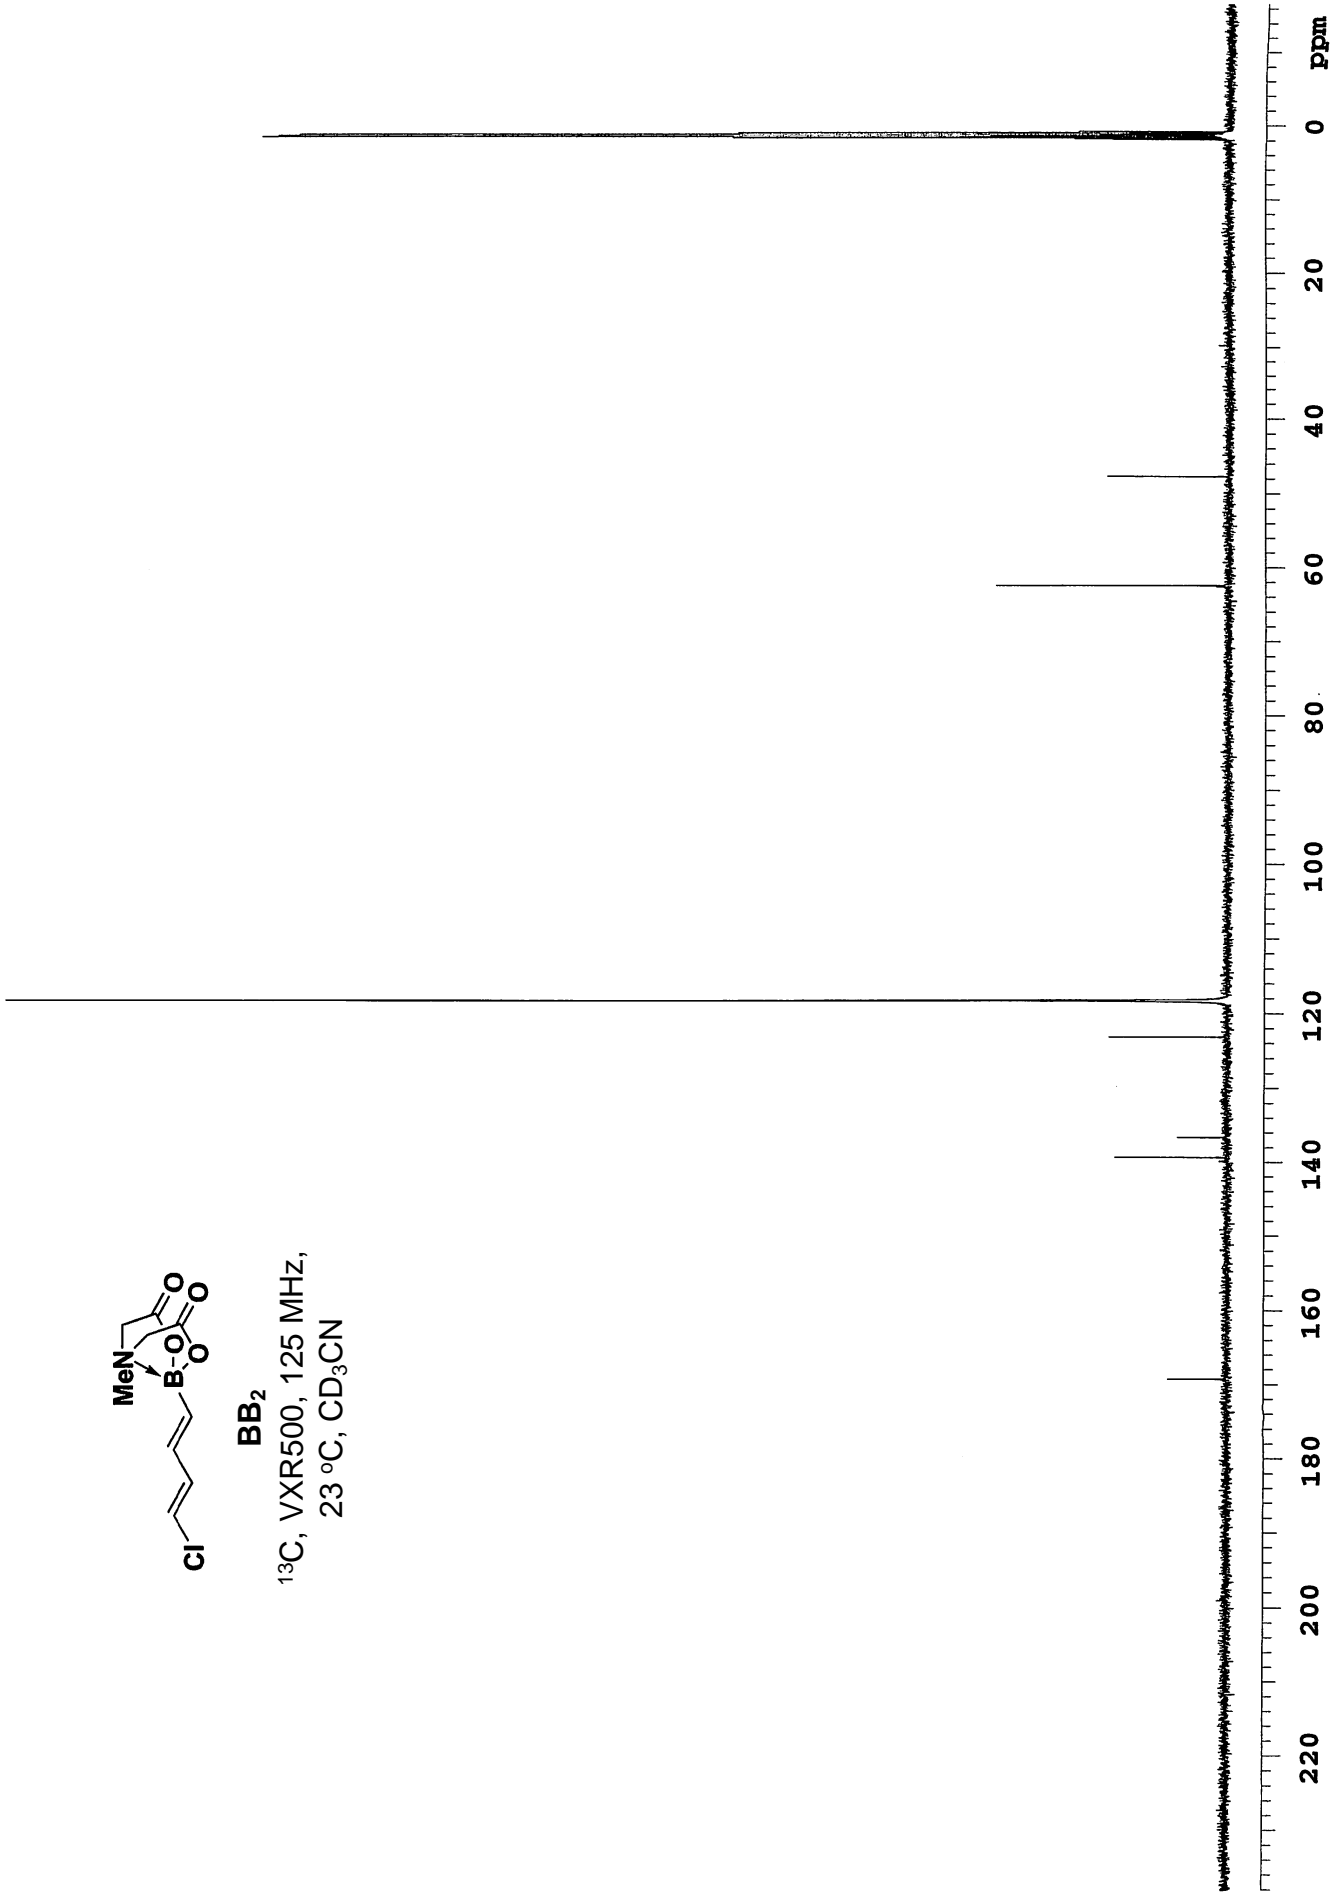

LSJI-5(BB3)

exp1 stdih

|             |            |            |            |
|-------------|------------|------------|------------|
| SAMPLE      |            | DEC. & VT  |            |
| date        | Oct 5 2007 | dn         | H1         |
| solvent     | CD3CN      | dof        | 0          |
| file        | exp        | dm         | nan        |
| ACQUISITION |            |            |            |
| sfrq        | 399.953    | dmf        | 200        |
| tn          | H1         | dpwr       | 20         |
| at          | 4.096      | PROCESSING |            |
| np          | 65536      | lb         | 0.30       |
| sw          | 8000.0     | wfile      |            |
| fb          | 4400       | proc       | ft         |
| bs          | 16         | fn         | not used   |
| tpwr        | 63         | math       | f          |
| pw          | 5.8        |            |            |
| dl          | 0          | werr       |            |
| tof         | -425.7     | wexp       | svf(nl)    |
| nt          | 16         | wbs        |            |
| ct          | 16         | wnt        | wft('acq') |
| alock       | n          | DISPLAY    |            |
| gain        | not used   | sp         | 37.0       |
| FLAGS       |            | wp         | 4311.7     |
| il          | n          | vs         | 131        |
| in          | n          | sc         | 0          |
| dp          | y          | wc         | 250        |
| hs          | nn         | hzmm       | 17.25      |
|             |            | is         | 540.58     |
|             |            | rfl        | 2785.0     |
|             |            | rfd        | 771.9      |
|             |            | th         | 20         |
|             |            | ins        | 3.000      |
|             |            | nm         | ph         |

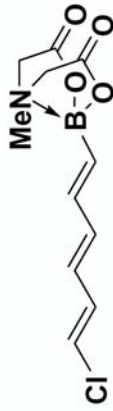

BB3

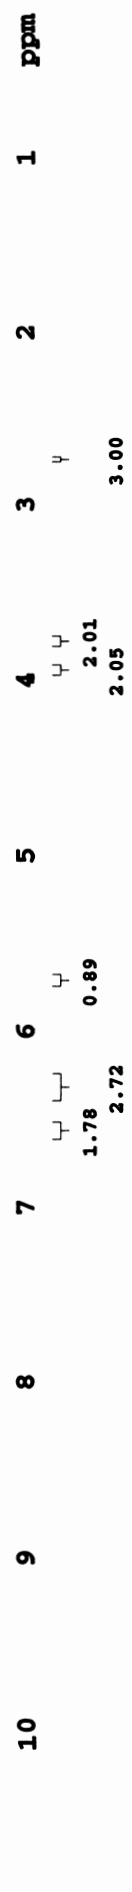

LSJI-5-13C(BB3)

exp1 std13c

|                 |             |
|-----------------|-------------|
| SAMPLE          | DEC. & VT   |
| date Oct 5 2007 | dn H1       |
| solvent CD3CN   | dof -1092.3 |
| file exp        | dm YYY      |
| ACQUISITION     | dmm W       |
| sfrq 100.579    | dmf 13889   |
| tn C13          | dpwr 48     |
| at 1.311        | PROCESSING  |
| np 65536        | lb 1.00     |
| sw 25000.0      | wfile       |
| fb 13800        | proc ft     |
| bs 16           | fn not used |
| tpwr 54         | math f      |
| PW 5.1          |             |
| d1 1.000        | werr        |
| tof 1966.4      | wexp        |
| nt 7777         | wbs         |
| ct 647          | wnt         |
| alock n         | DISPLAY     |
| gain not used   | sp -812.3   |
| FLAGS           | wp 22820.2  |
| il n            | vs 100      |
| in n            | sc 0        |
| dp y            | wc 250      |
| hs nn           | hzmm 91.28  |
|                 | is 500.00   |
|                 | rfl 975.8   |
|                 | rfp 130.7   |
|                 | th 20       |
|                 | ins 100.000 |
|                 | nm ph       |

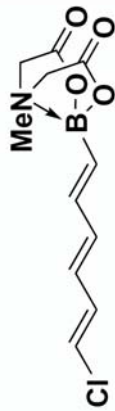

BB3

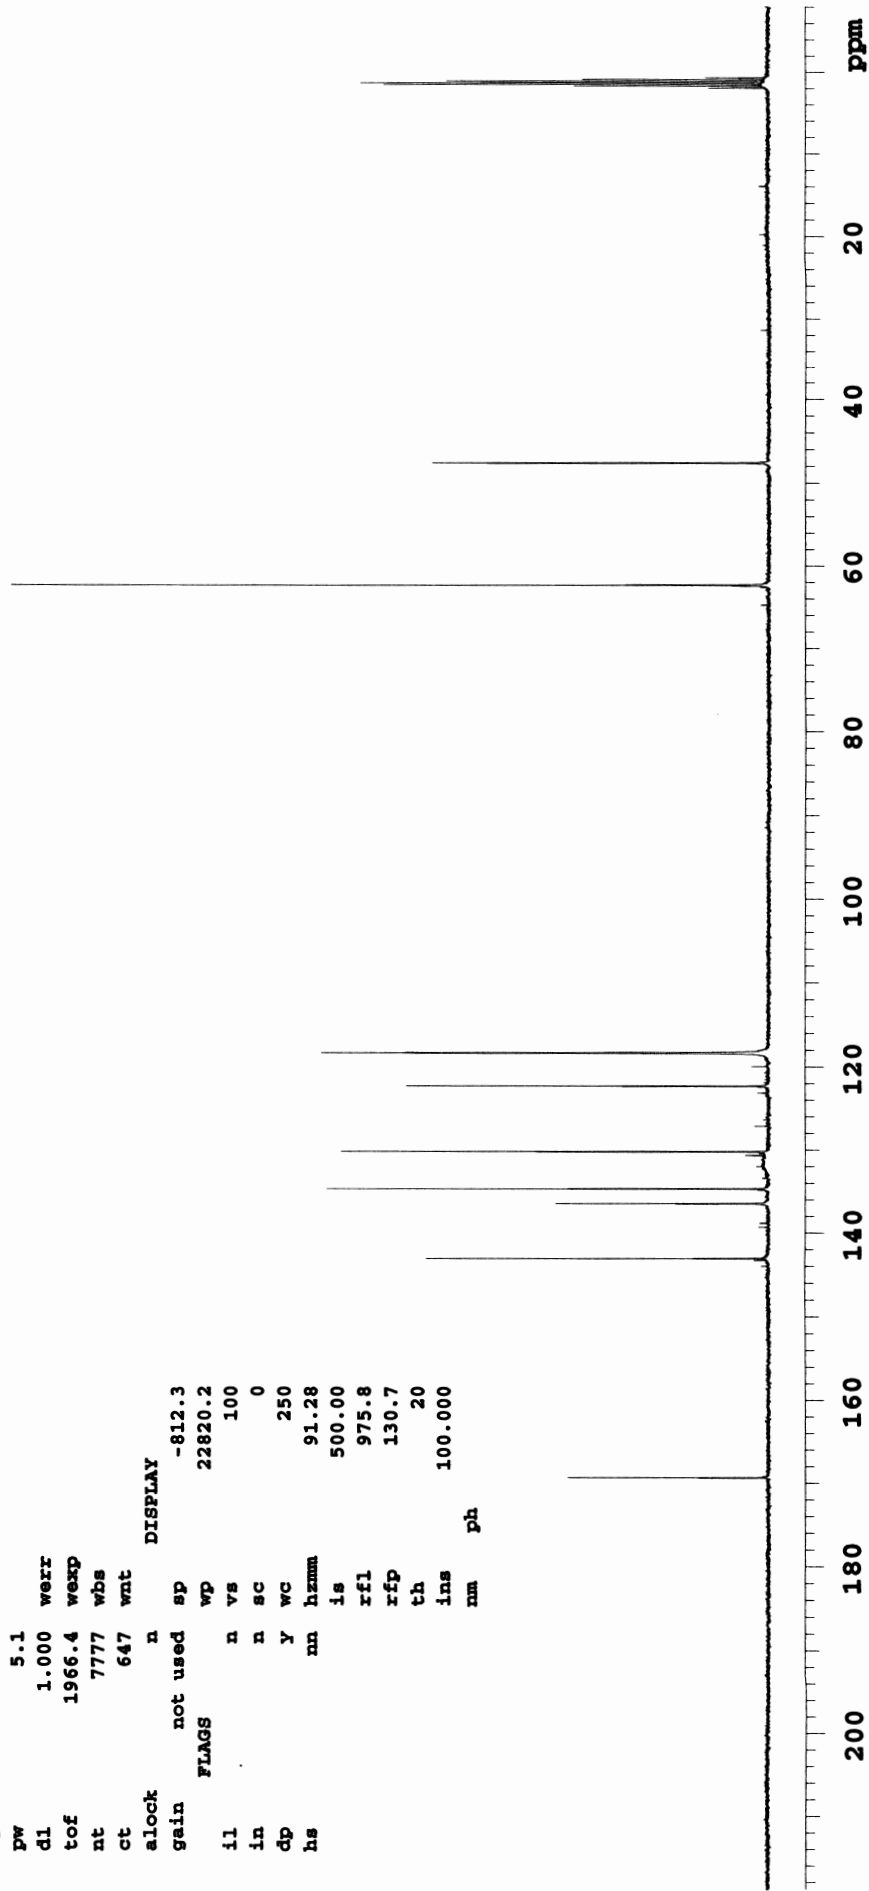

LSJI-23

exp1 s2pul

SAMPLE DEC. & VT  
 date Sep 26 2007 dfrq 499.701  
 solvent DMSO dn H1  
 file exp dpwr 20  
 ACQUISITION dof 0  
 sfrq 499.701 dm nnn  
 tn H1 dnm c  
 at 4.665 dmf 200  
 np 65536 dseq  
 sw 7024.9 dres 1.0  
 fb 4000 hmo n  
 bs 4 PROCESSING  
 tpwr 63 lb not used  
 pw 6.5 wtfile  
 dl 0 proc ft  
 tof 2.0 fn not used  
 nt 16 math f  
 ct 16  
 alock n werr  
 gain not used wexp svf(ml)  
 FLAGS wbs wft('acq')

DISPLAY  
 sp 48.0  
 wp 5413.8  
 vs 129  
 sc 0  
 wc 250  
 hzmm 21.66  
 is 1564.61  
 rfl 2256.5  
 rfp 1244.3  
 th 7  
 ins 3.000  
 ai ph

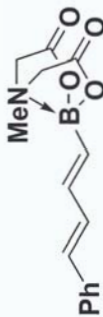

6

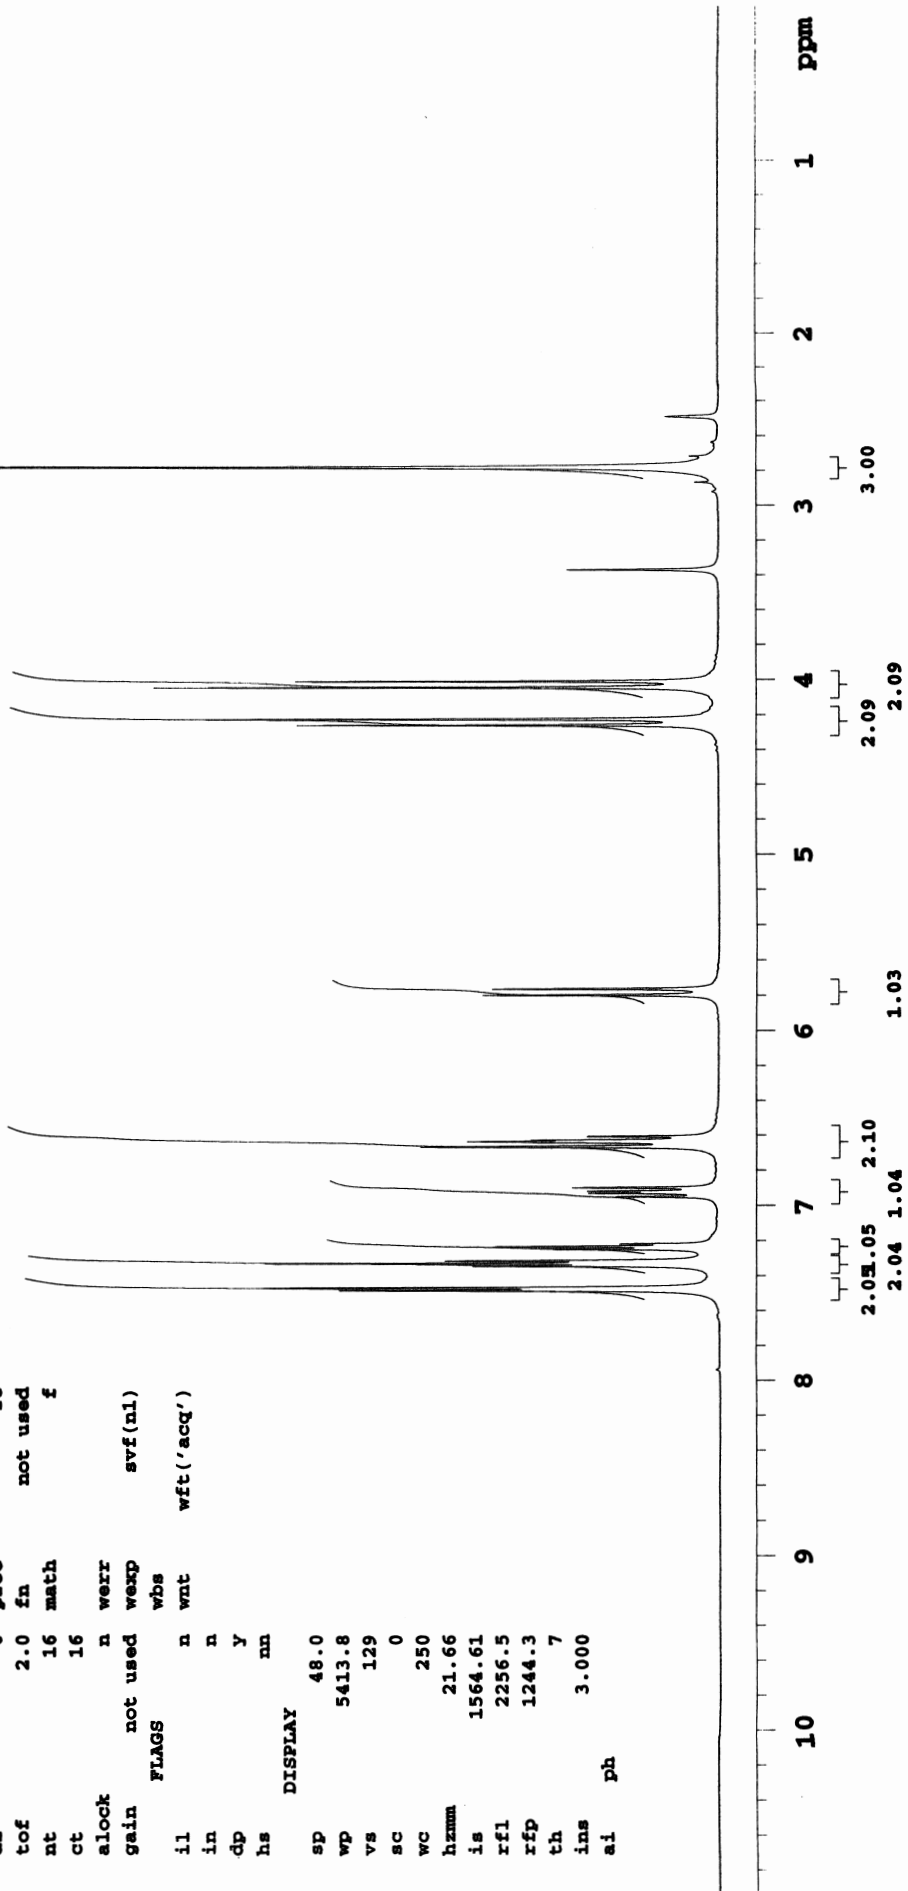



LSJII-19 (15days-old)

exp1 s2pul

|                  |                |
|------------------|----------------|
| SAMPLE           | DEC. & VT      |
| date Nov 27 2007 | dfrq 499.701   |
| solvent DMSO     | dn H1          |
| file exp         | dpwr 20        |
| ACQUISITION      | dof 0          |
| sfrq 499.701     | dm nnn         |
| tn H1            | chmm c         |
| at 4.665         | dmf 200        |
| np 65536         | dseq           |
| sw 7024.9        | dres 1.0       |
| fb 4000          | homo n         |
| bs 4             | PROCESSING     |
| tpwr 60          | lb not used    |
| pw 6.5           | wtfile         |
| d1 0             | proc ft        |
| tof 2.0          | fn not used    |
| nt 64            | math f         |
| ct 64            |                |
| alock n          | werr           |
| gain not used    | wexp svf(nl)   |
| FLAGS            | wbs            |
| il n             | wnt wft('acq') |
| in n             |                |
| dp y             |                |
| hs nn            |                |
| DISPLAY          |                |
| sp 34.4          |                |
| wp 5420.7        |                |
| vs 48            |                |
| sc 0             |                |
| wc 250           |                |
| hzmm 21.68       |                |
| is 2633.92       |                |
| rfl 2257.3       |                |
| rfp 1244.3       |                |
| th 7             |                |
| ins 3.000        |                |
| si ph            |                |

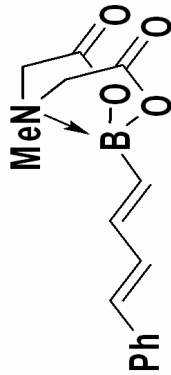

6

Storage for 15 days in DMSO-d<sub>6</sub> at 23°C under air

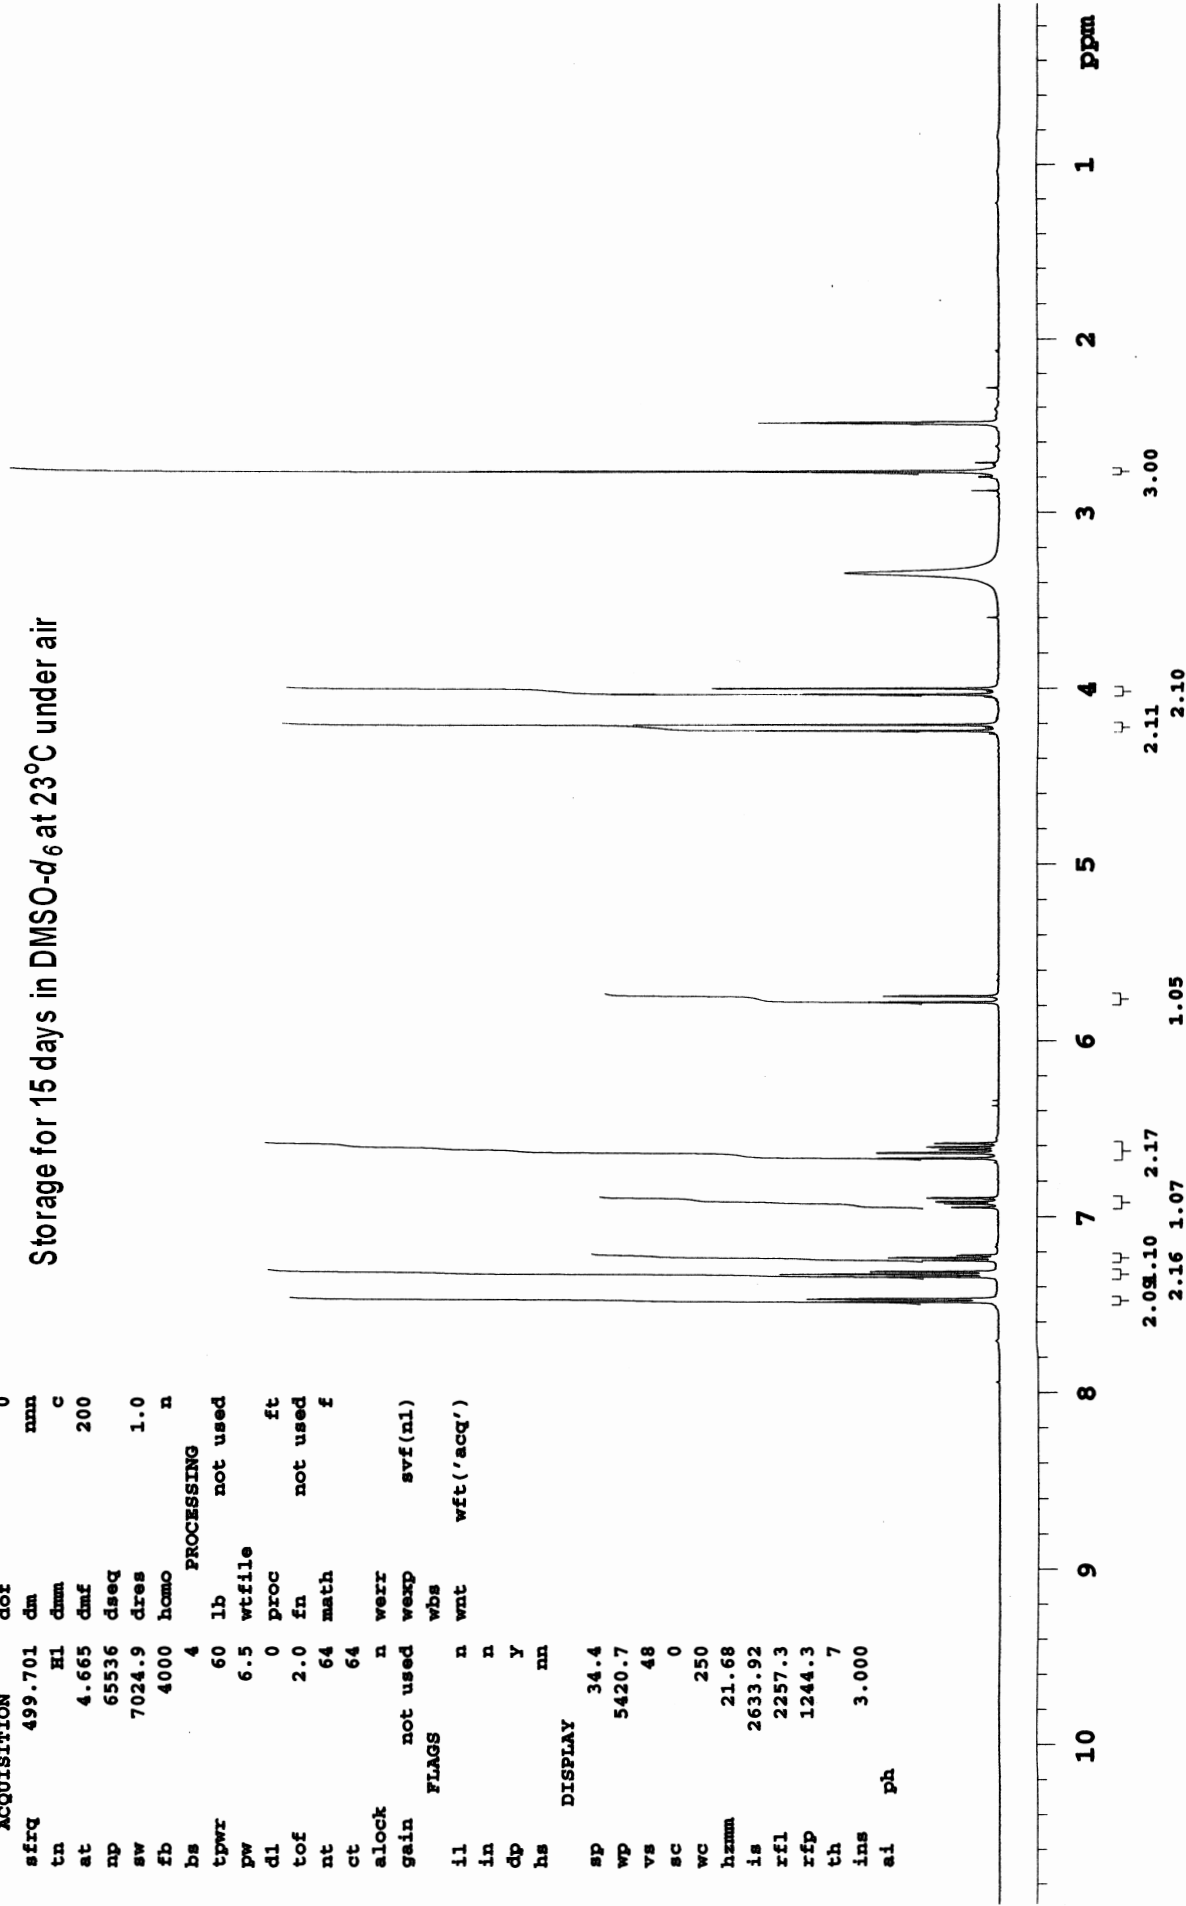

LSJI-23-13C

exp1 s2pul

|             |             |            |          |
|-------------|-------------|------------|----------|
| SAMPLE      |             | DEC. & VT  |          |
| date        | Sep 26 2007 | dfrq       | 499.700  |
| solvent     | DMSO        | dn         | H1       |
| file        | exp         | dpwr       | 44       |
| ACQUISITION |             | dof        | -827.6   |
| sfrq        | 125.663     | dm         | YFY      |
| tn          | C13         | dmm        | w        |
| at          | 1.086       | dmf        | 12000    |
| np          | 65536       | dseq       |          |
| sw          | 30165.9     | dres       | 90.0     |
| fb          | 16600       | homo       | n        |
| bs          | 16          | PROCESSING |          |
| ss          | 1           | lb         | 1.00     |
| tpwr        | 53          | wtfile     |          |
| pw          | 6.0         | proc       | ft       |
| d1          | 1.000       | fn         | not used |
| tof         | 1884.7      | math       | f        |
| nt          | 7777        |            |          |
| ct          | 2969        | werr       |          |
| alock       | n           | wexp       |          |
| gain        | not used    | wbs        |          |
| FLAGS       |             | wnt        |          |
| il          | n           |            |          |
| in          | n           |            |          |
| dp          | y           |            |          |
| hs          | nn          |            |          |
| DISPLAY     |             |            |          |
| sp          | 145.6       |            |          |
| wp          | 27363.5     |            |          |
| vs          | 105         |            |          |
| sc          | 0           |            |          |
| wc          | 250         |            |          |
| hzmm        | 109.45      |            |          |
| is          | 500.00      |            |          |
| rfl         | 6305.3      |            |          |
| rfp         | 4963.2      |            |          |
| th          | 38          |            |          |
| ins         | 100.000     |            |          |
| nm          | ph          |            |          |

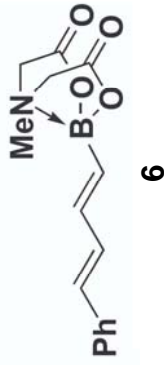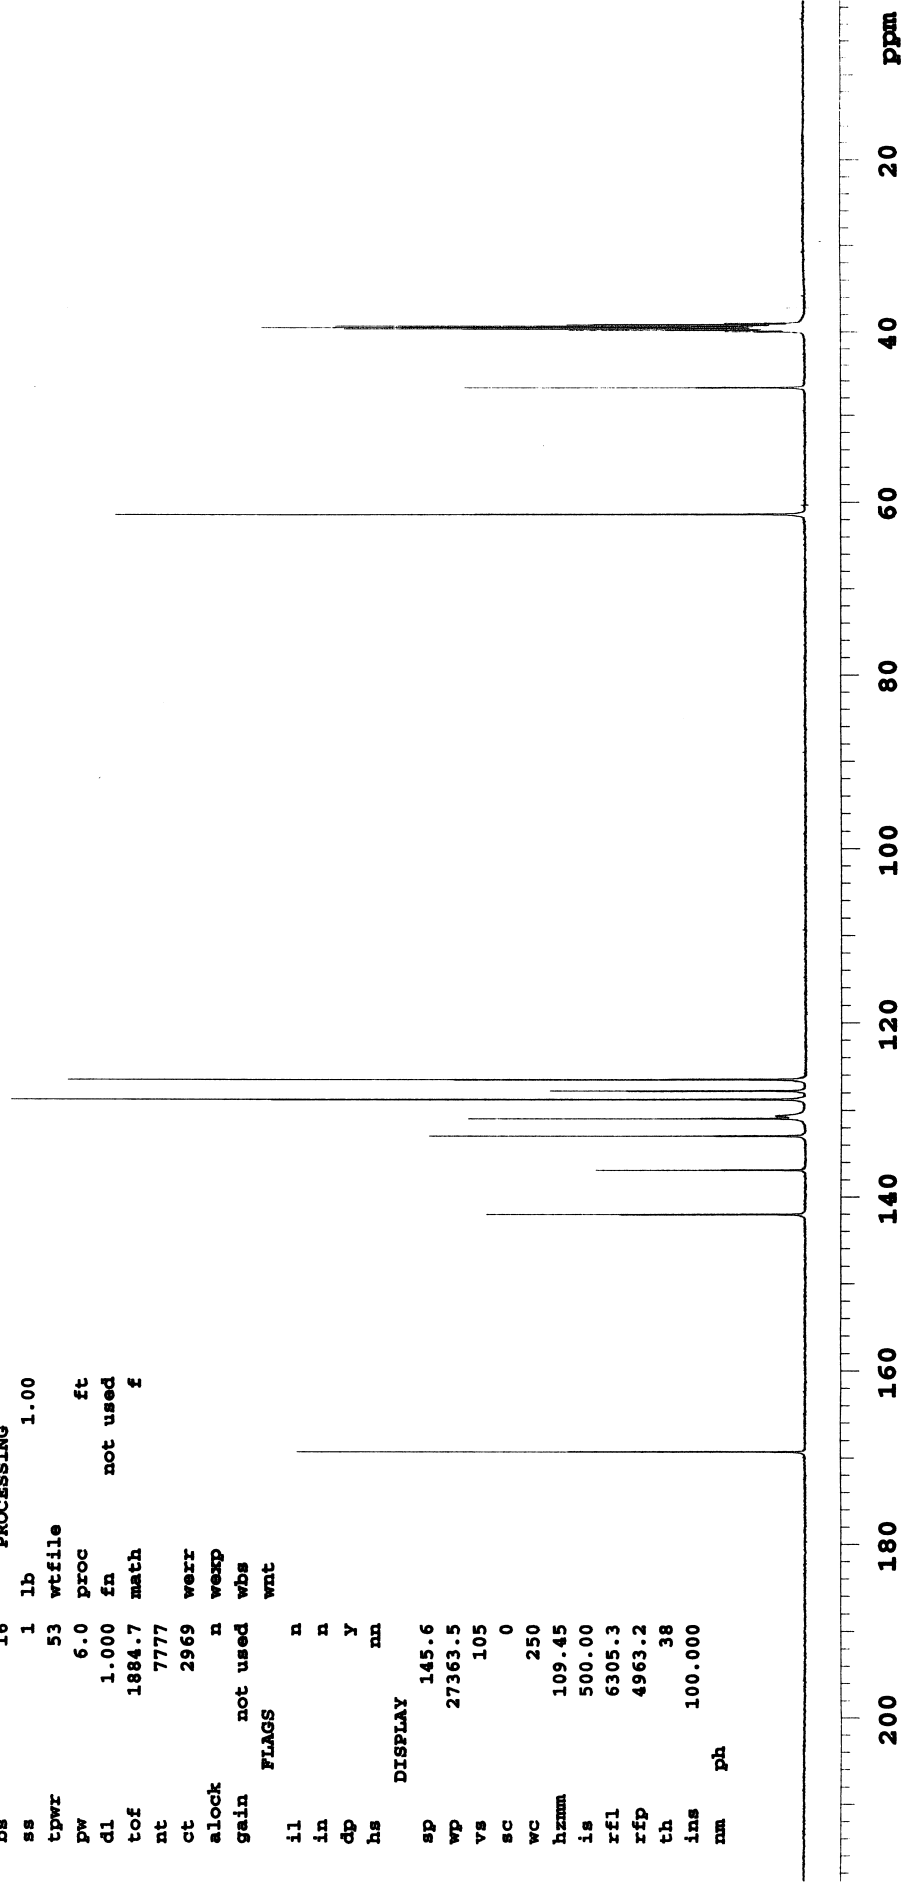

LSJ1-17

exp1 s2pul

```

SAMPLE          DEC. & VT
date  May 17 2007  dfrq  499.702
solvent  CD3CN  dn      H1
file     exp     dpwr  20
ACQUISITION  dof    0
sfrq  499.702  dm      nnn
tn     H1      dnm      C
at     4.665  dmf      200
np     65536  dseq
sw     7024.9 dres      1.0
fb     4000  homo      n
bs     4      PROCESSING
tpwr   63 lb      not used
pw     6.5 wtfile
dl     0 proc      ft
tof    2.0 fn      not used
nt     8 math      f
ct     8
alock  n verz
gain   not used wexp  svf(ml)
FLAGS  not used wbs
il     n wnt      wft('acq')
in     n
cp     y
hs     nn
DISPLAY
sp     15.5
wp     5452.6
vs     26
sc     0
wc     250
hzmm   21.81
is     1718.70
rfl    1997.0
rfp    964.4
th     7
ins    3.000
ai     ph

```

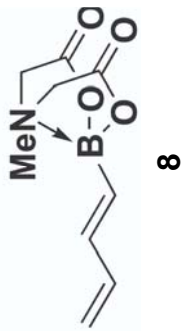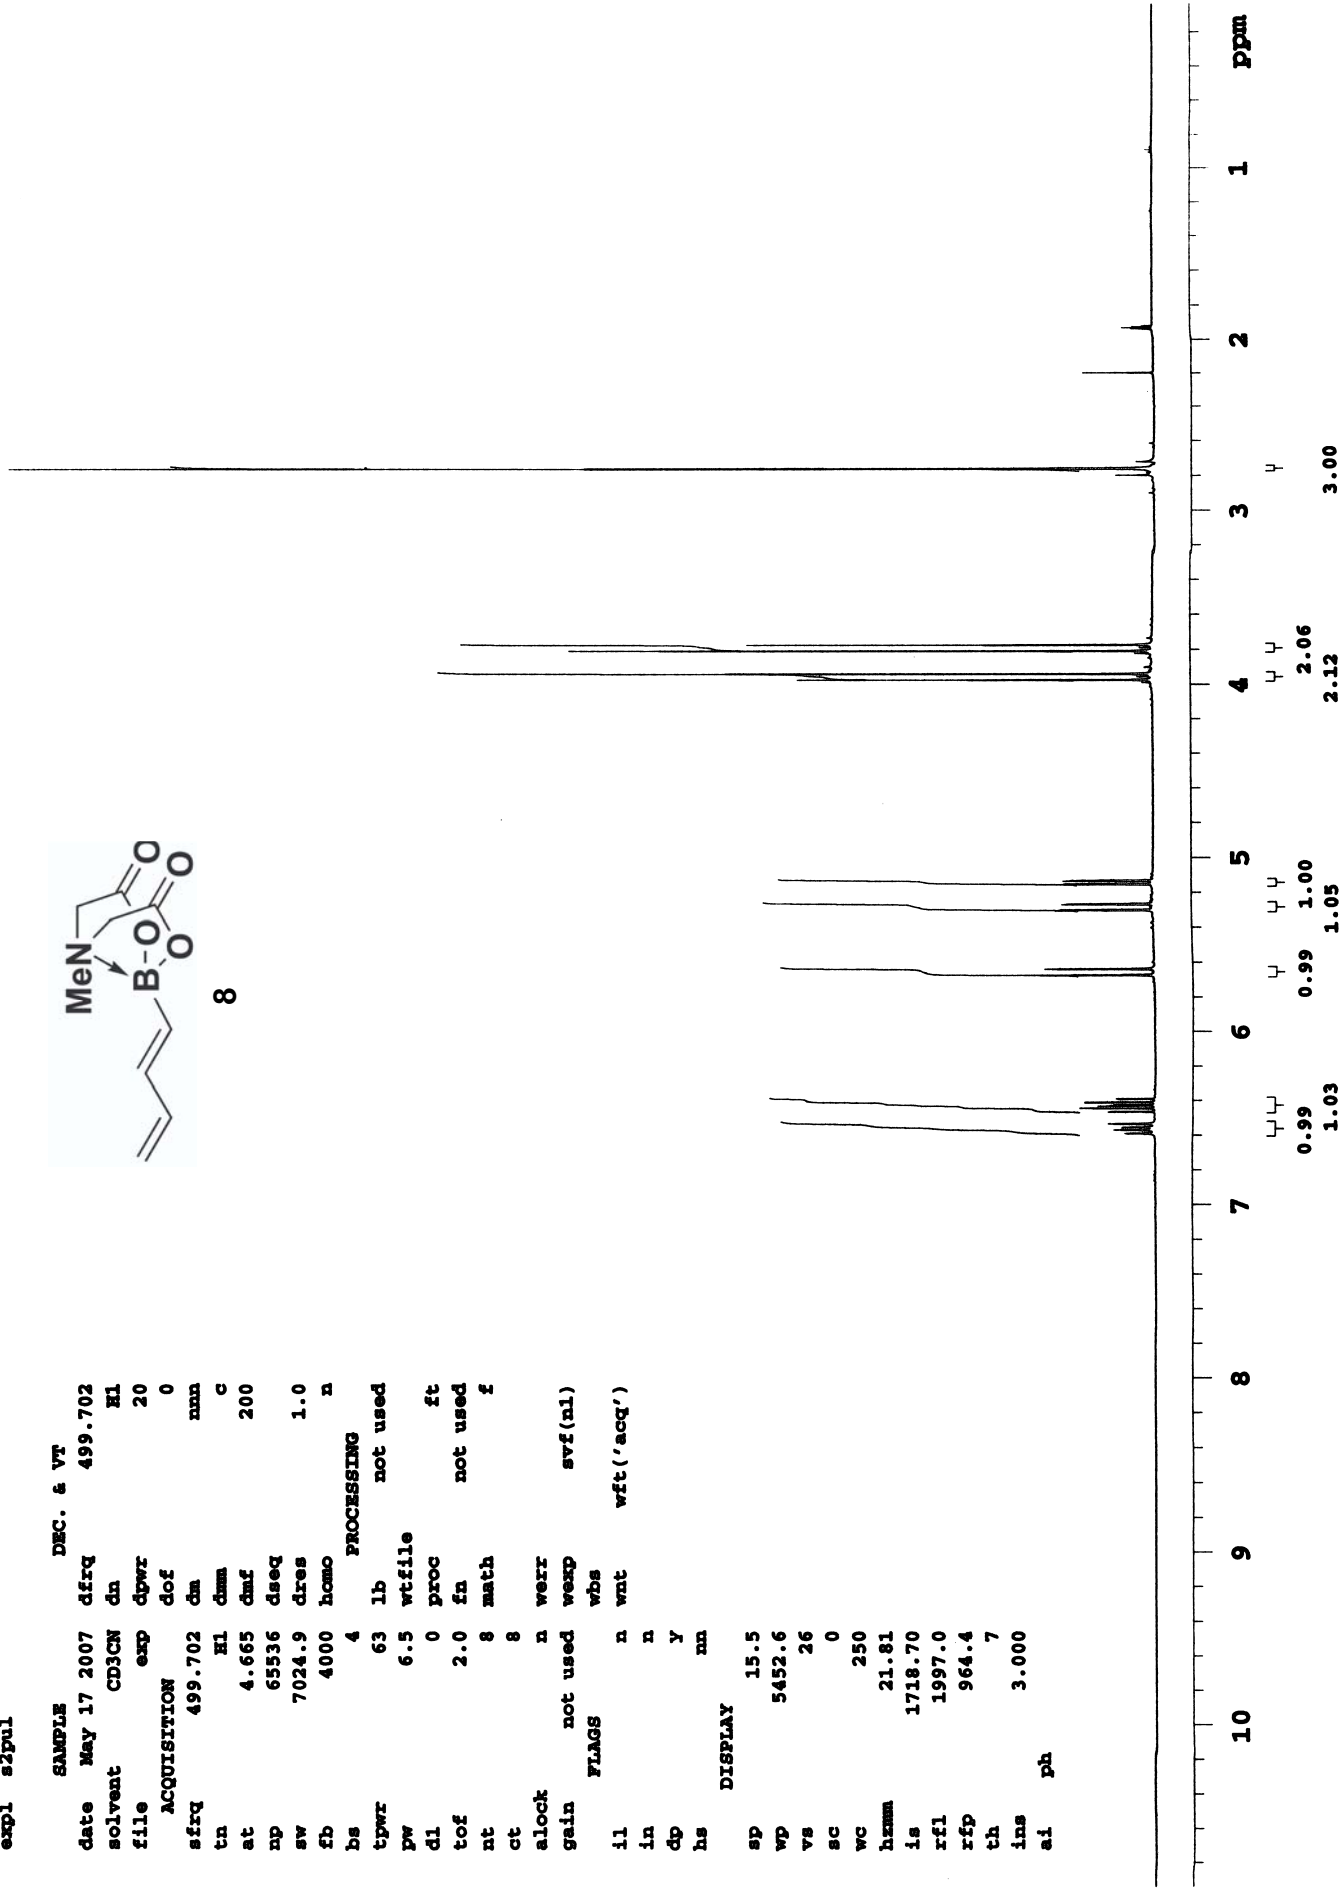

LSGT-17-13C

exp1 s2pul

|             |             |            |          |
|-------------|-------------|------------|----------|
| SAMPLE      |             | DEC. & VT  |          |
| date        | May 17 2007 | dfrq       | 499.701  |
| solvent     | CD3CN       | dn         | HL       |
| file        | exp         | dpwr       | 44       |
| ACQUISITION |             | dof        | -827.6   |
| sfrq        | 125.663     | dm         | YFY      |
| tn          | C13         | dmm        | W        |
| at          | 1.086       | dmf        | 12000    |
| np          | 65536       | dseq       |          |
| sw          | 30165.9     | dres       | 90.0     |
| fb          | 16600       | homo       | n        |
| bs          | 16          | PROCESSING |          |
| ss          | 1           | lb         | 1.00     |
| tpwr        | 53          | wtfile     |          |
| pw          | 6.0         | proc       | ft       |
| d1          | 1.000       | fn         | not used |
| tof         | 1884.7      | math       | f        |
| nt          | 1500        |            |          |
| ct          | 1467        | warr       |          |
| alock       | n           | wexp       |          |
| gain        | not used    | wbs        |          |
| FLAGS       |             | wnt        |          |
| il          | n           |            |          |
| in          | n           |            |          |
| dp          | y           |            |          |
| hs          | nn          |            |          |
| DISPLAY     |             |            |          |
| sp          | -1176.2     |            |          |
| vp          | 29429.4     |            |          |
| vs          | 140         |            |          |
| sc          | 0           |            |          |
| vc          | 250         |            |          |
| hzmm        | 117.72      |            |          |
| is          | 500.00      |            |          |
| rfl         | 1339.5      |            |          |
| rfp         | 163.3       |            |          |
| th          | 153         |            |          |
| ins         | 100.000     |            |          |
| nm          | ph          |            |          |

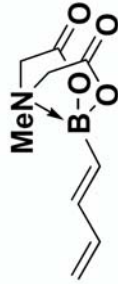

8

220 200 180 160 140 120 100 80 60 40 20 ppm

LSJ1-19

exp1 s2pul

SAMPLE DEC. & VT  
 date May 19 2007 dfrq 499.699  
 solvent CDCl3 dn H1  
 file exp dpwr 20  
 ACQUISITION dof 0  
 sfrq 499.699 dm nnn  
 tn H1 dma c  
 at 4.665 dmf 200  
 np 65536 dseq  
 sw 7024.9 dres 1.0  
 fb 4000 homo n  
 bs 4 PROCESSING  
 tpwr 63 lb not used  
 pw 6.5 wfile  
 dl 0 proc ft  
 tof 2.0 fn not used f  
 nt 16 math  
 ct 16  
 alock n werr  
 gain not used wexp svf(nl)  
 FLAGS wbs  
 il n wnt wft('acq')  
 in n  
 dp y  
 bs nn  
 DISPLAY  
 sp 36.0  
 wp 5444.5  
 vs 40  
 sc 0  
 wc 250  
 hzmm 21.78  
 is 1799.31  
 rfl 4642.0  
 rfp 3617.8  
 th 7  
 ins 3.000  
 ai ph

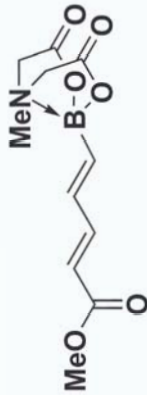

10

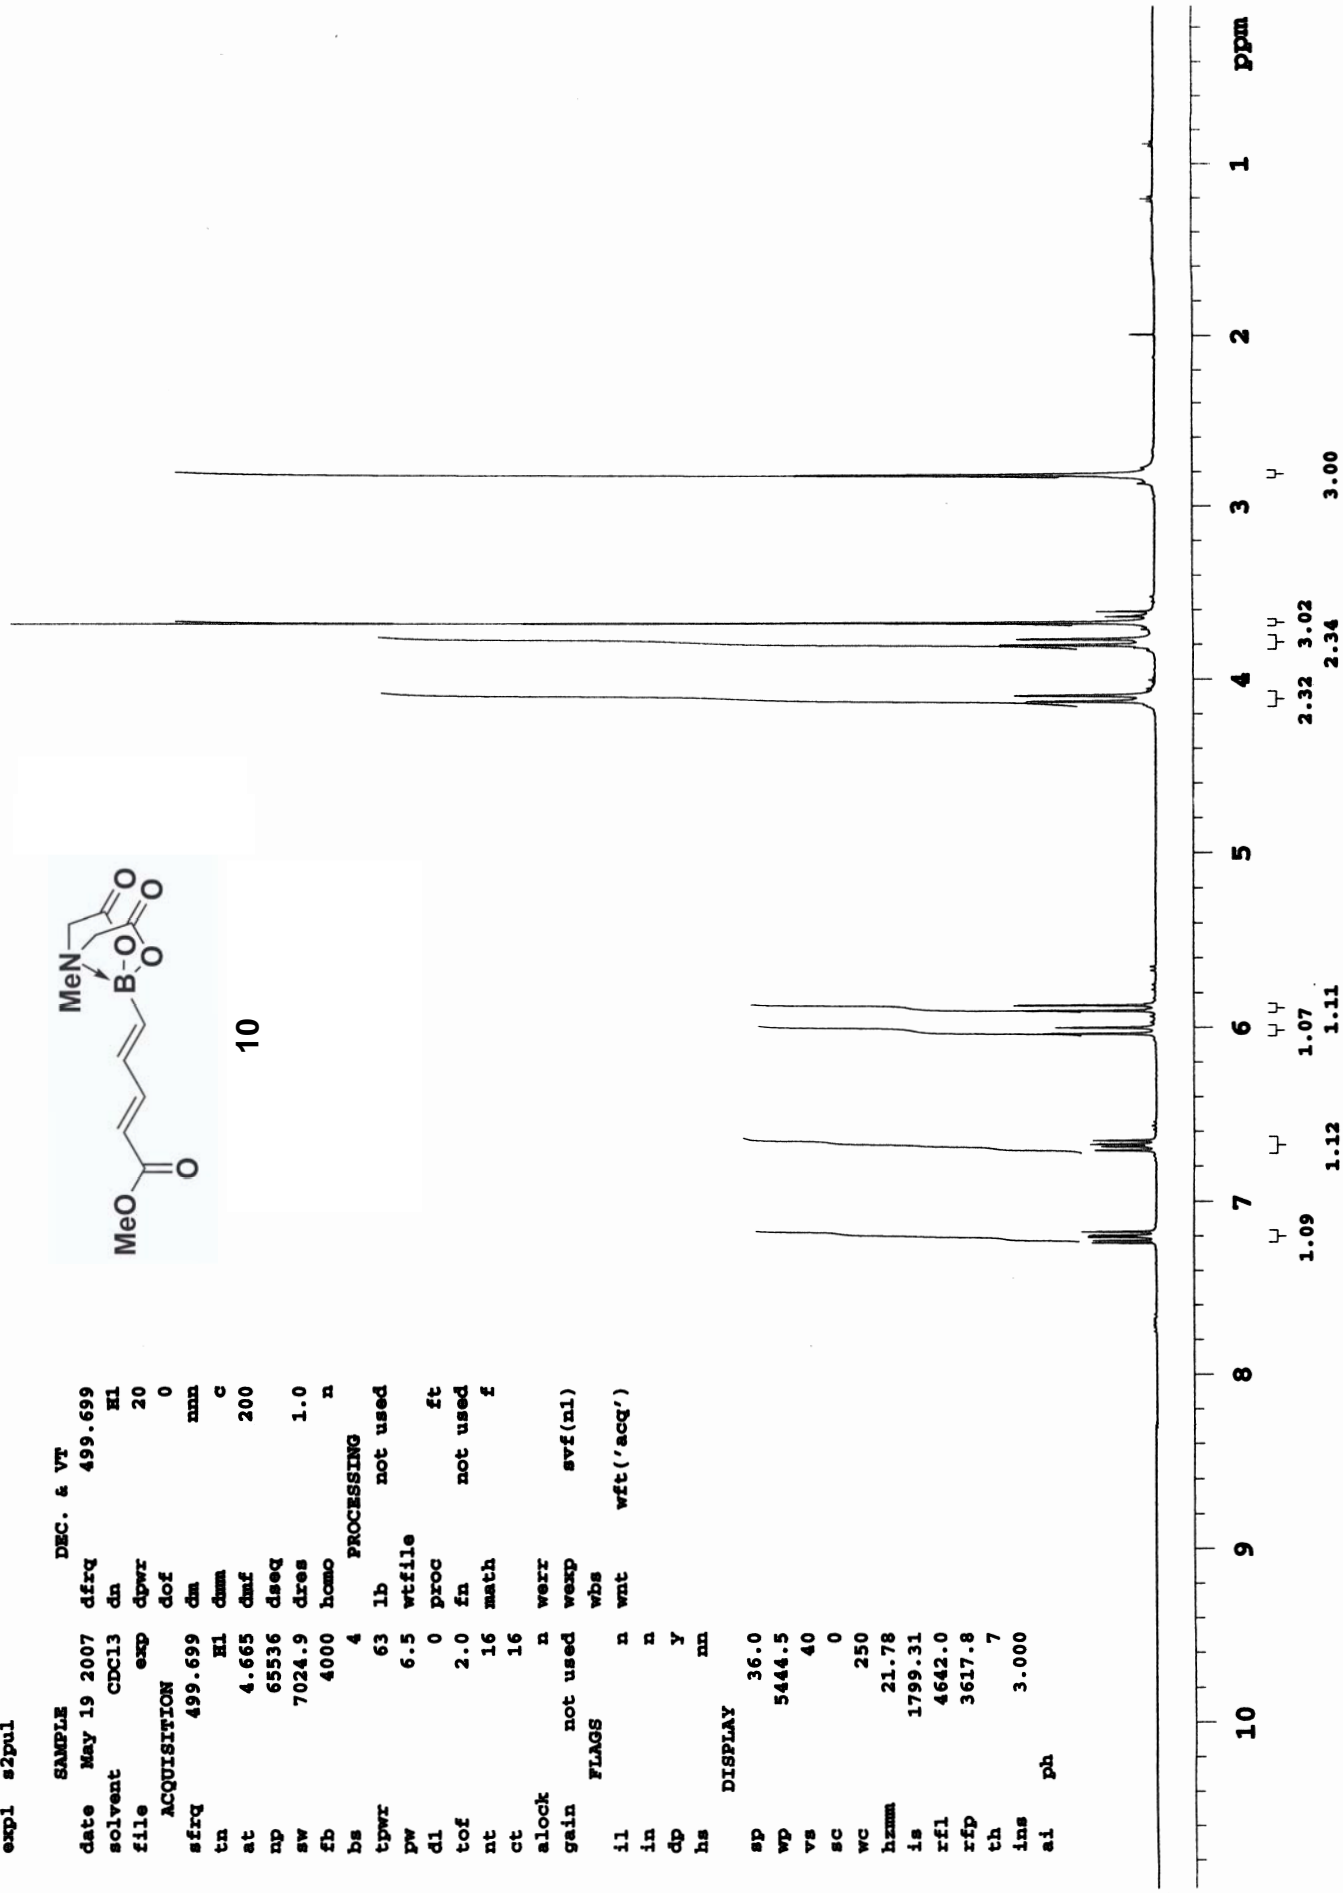

10

9

8

7

6

5

4

3

2

1

ppm

LSJ1-19-13C

exp1 s2pul

```

SAMPLE          DEC. & VT
.date May 19 2007  dfrq 499.698
solvent CDCl3      dn   H1
file      exp      dpwr 44
          ACQUISITION  dof  -827.6
sfrq 125.663      dm   YFY
tn      C13      dmm   W
at      1.086      dmf  12000
np      65536      dseq
sw      30165.9   dres  90.0
fb      16600     homo  n
bs      16        PROCESSING
ss      1         lb    1.00
tpwr    53       wtfile
pw      6.0      proc  ft
dl      1.000    fn    not used
tof     1884.7   math  f
nt      1500
ct      1369     werr
alock   n       wexp
gain    not used wbs
          FLAGS  wnt
il      n
in      n
dp      y
hs      mn
          DISPLAY
sp      1326.8
wp      27538.5
vs      140
sc      0
wc      250
hzmm    110.15
is      500.00
rf1     10974.7
rfp     9675.0
th      152
ins     100.000
nm      ph

```

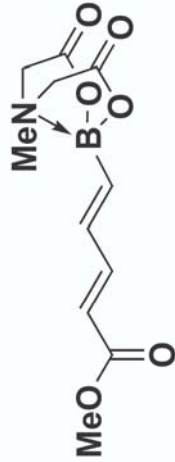

10

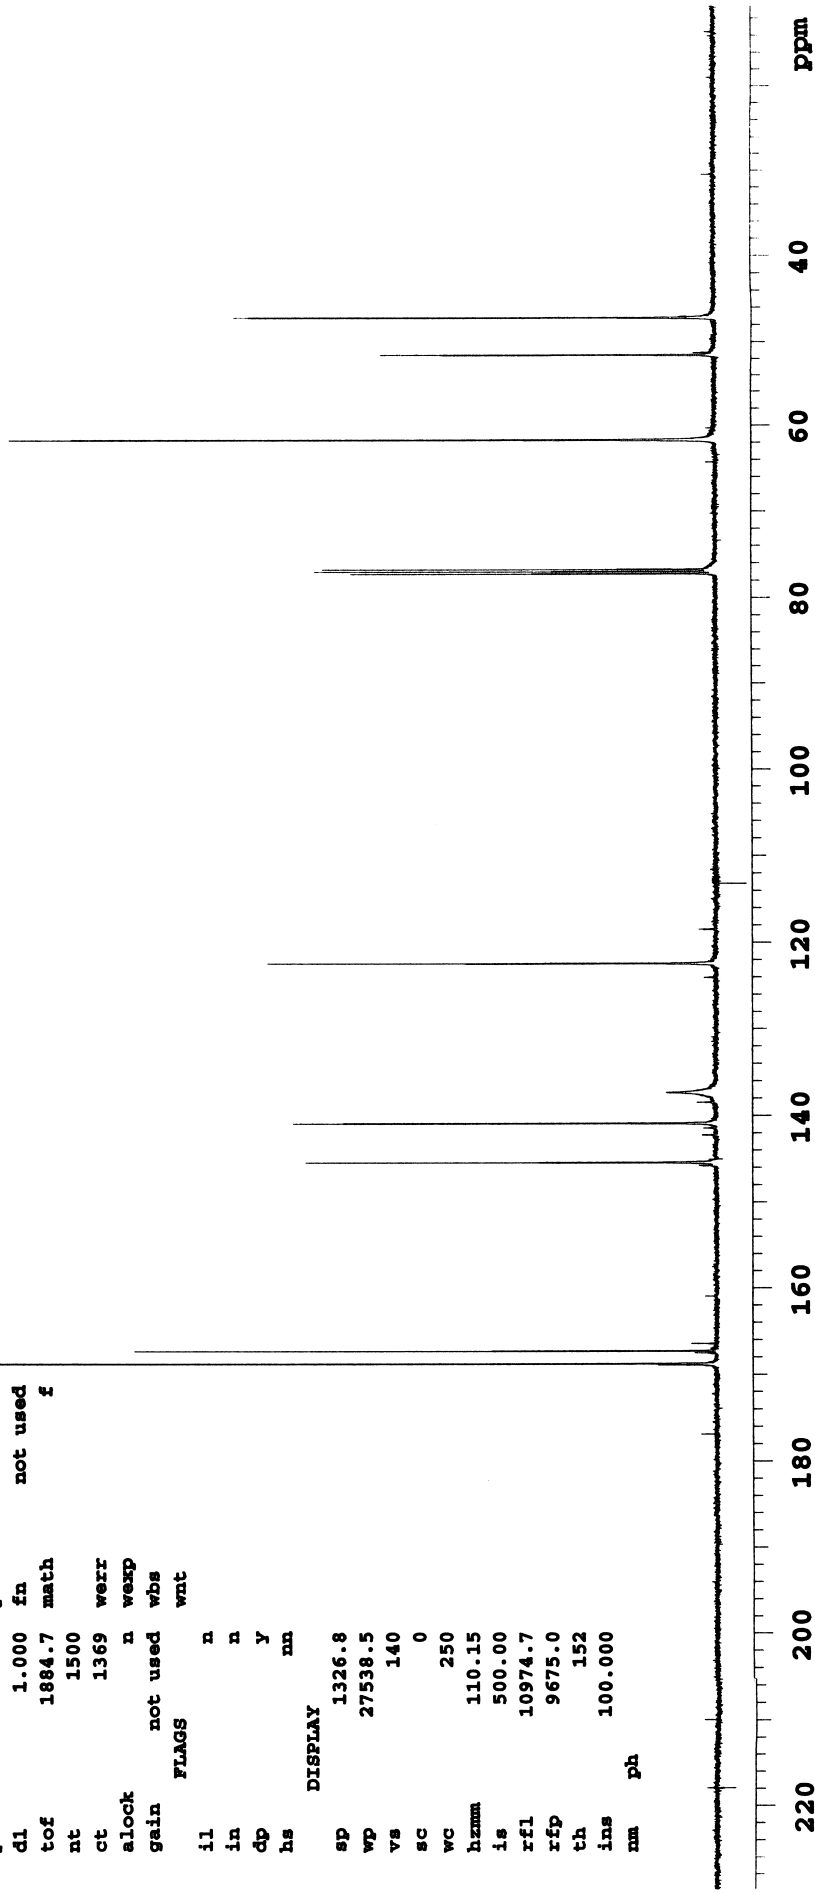

LSJTI-18

exp1 s2pul

|             |             |            |            |
|-------------|-------------|------------|------------|
| SAMPLE      |             | DEC. & VT  |            |
| date        | May 15 2007 | dfrq       | 499.699    |
| solvent     | CDCl3       | dn         | H1         |
| file        | exp         | dpwr       | 20         |
| ACQUISITION |             | dof        | 0          |
| sfrq        | 499.699     | dm         | nmn        |
| tn          | H1          | dmn        | C          |
| at          | 4.665       | daf        | 200        |
| xp          | 65536       | dseq       |            |
| sw          | 7024.9      | dres       | 1.0        |
| fb          | 4000        | homo       | n          |
| bs          | 4           | PROCESSING |            |
| tpwr        | 63          | lb         | not used   |
| pw          | 6.5         | wtfile     |            |
| dl          | 0           | proc       | ft         |
| tof         | 2.0         | fn         | not used   |
| nt          | 16          | math       | f          |
| ct          | 16          |            |            |
| alock       | n           | werr       |            |
| gain        | not used    | wexp       | svf(nl)    |
| FLAGS       |             | wbs        |            |
| il          | n           | wnt        | wft('acq') |
| in          | n           |            |            |
| dp          | y           |            |            |
| hs          | nn          |            |            |
| DISPLAY     |             |            |            |
| sp          | -475.8      |            |            |
| vp          | 5937.1      |            |            |
| vs          | 12          |            |            |
| sc          | 0           |            |            |
| vc          | 250         |            |            |
| hnum        | 23.75       |            |            |
| is          | 816.72      |            |            |
| xf1         | 4642.4      |            |            |
| xfp         | 3617.8      |            |            |
| th          | 7           |            |            |
| ins         | 9.000       |            |            |
| sl          | ph          |            |            |

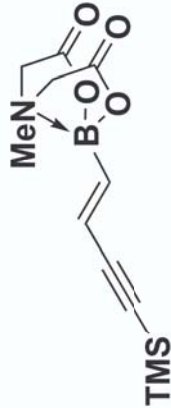

12

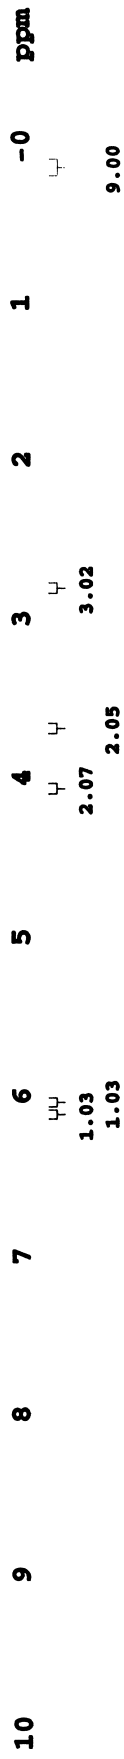

LSJ1-18-13C

exp1 s2pul

|             |             |            |          |
|-------------|-------------|------------|----------|
| SAMPLE      |             | DEC. & VT  |          |
| date        | May 15 2007 | dfrq       | 499.698  |
| solvent     | CDC13       | dn         | H1       |
| file        | exp         | dpwr       | 44       |
| ACQUISITION |             | dof        | -827.6   |
| sfrq        | 125.663     | dm         | YFF      |
| tn          | C13         | dmm        | W        |
| at          | 1.086       | dmf        | 12000    |
| np          | 65536       | dseq       |          |
| sw          | 30165.9     | dres       | 90.0     |
| fb          | 16600       | homo       | n        |
| bs          | 16          | PROCESSING |          |
| ss          | 1           | lb         | 1.00     |
| tpwr        | 53          | wtfile     |          |
| pw          | 6.0         | proc       | ft       |
| d1          | 1.000       | fn         | not used |
| tof         | 1884.7      | math       | f        |
| nt          | 1500        |            |          |
| ct          | 1205        | warr       |          |
| alock       | n           | wexp       |          |
| gain        | not used    | wbs        |          |
| FLAGS       |             | wnt        |          |
| il          | n           |            |          |
| in          | n           |            |          |
| dp          | y           |            |          |
| hs          | nn          |            |          |
| DISPLAY     |             |            |          |
| sp          | -1254.6     |            |          |
| wp          | 30078.5     |            |          |
| vs          | 140         |            |          |
| sc          | 0           |            |          |
| wc          | 250         |            |          |
| hazmm       | 120.31      |            |          |
| is          | 500.00      |            |          |
| rfl         | 10972.9     |            |          |
| rfp         | 9675.0      |            |          |
| th          | 156         |            |          |
| ims         | 100.000     |            |          |
| nm          | ph          |            |          |

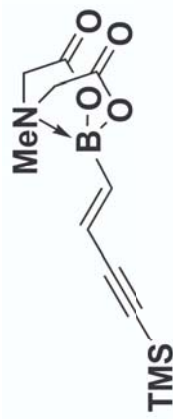

12

220 200 180 160 140 120 100 80 60 40 20 ppm



LSJI-22

expl s2pul

|                  |                |
|------------------|----------------|
| SAMPLE           | DEC. & VT      |
| date Sep 30 2007 | dfrq 499.702   |
| solvent CD3CN    | dn H1          |
| file exp         | dpwr 20        |
| ACQUISITION      | dof 0          |
| sfrq 499.702     | dm nnn         |
| tn H1            | dm c           |
| at 4.665         | dmf 200        |
| np 65536         | dseq           |
| sw 7024.9        | dres 1.0       |
| fb 4000          | homo n         |
| bs 4             | PROCESSING     |
| tpwr 63          | lb not used    |
| pw 6.5           | wtfile         |
| d1 0             | proc ft        |
| tof 2.0          | fn not used    |
| nt 16            | math f         |
| ct 16            |                |
| alock n          | werr           |
| gain not used    | wexp svf(nl)   |
| FLAGS            | wbs            |
| il n             | wnt wft('acq') |
| in n             |                |
| dp y             |                |
| hs nn            |                |
| DISPLAY          |                |
| sp 27.3          |                |
| wp 5413.8        |                |
| vs 10            |                |
| sc 0             |                |
| wc 250           |                |
| hzmm 21.66       |                |
| is 533.57        |                |
| rfl 1997.3       |                |
| rfp 964.4        |                |
| th 7             |                |
| ins 12.000       |                |
| ai ph            |                |

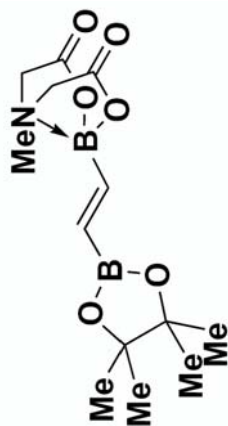

14

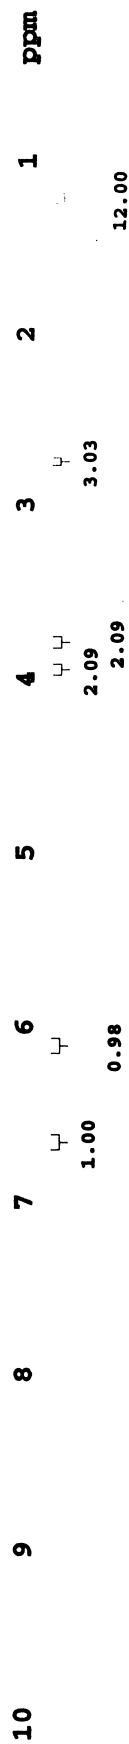

PCBE-CPIn(1year/5month old)

expl stdlh

|             |            |            |            |
|-------------|------------|------------|------------|
| date        | Sep 4 2007 | dn         | H1         |
| solvent     | CD3CN      | dof        | 0          |
| file        | exp        | dm         | nmn        |
| ACQUISITION | exp        | dmn        | C          |
| sfrq        | 399.953    | dmf        | 200        |
| tn          | H1         | dpwr       | 20         |
| at          | 4.096      | PROCESSING |            |
| np          | 65536      | lb         | not used   |
| sw          | 8000.0     | wtfile     |            |
| fb          | 4400       | proc       | ft         |
| bs          | 16         | fn         | not used   |
| tpwr        | 63         | math       | F          |
| PW          | 5.8        |            |            |
| dl          | 0          | werr       |            |
| tof         | -425.7     | wexp       | svf(n1)    |
| nt          | 16         | vbs        |            |
| ct          | 16         | wnt        | wft('acq') |
| alock       | n          | DISPLAY    |            |
| gain        | not used   | sp         | -16.2      |
| FLAGS       |            | wp         | 4400.5     |
| il          | n          | vs         | 151        |
| in          | n          | sc         | 0          |
| dp          | y          | wc         | 250        |
| hs          | nn         | hmm        | 17.60      |
|             |            | is         | 730.68     |
|             |            | rfl        | 2785.0     |
|             |            | rfp        | 771.9      |
|             |            | th         | 20         |
|             |            | ins        | 12.000     |
|             |            | nm         | ph         |

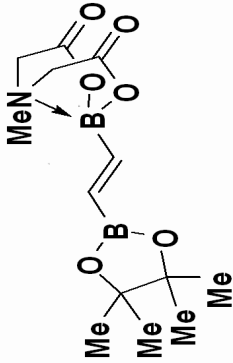

14

Storage for 1.5 years at 23°C under air

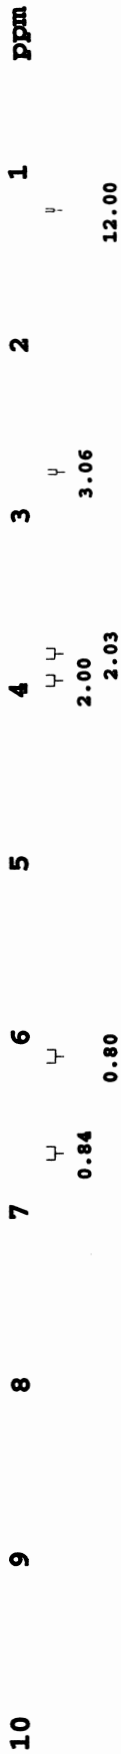

LSJ1-22-13C

exp1 s2pul

|             |             |            |          |
|-------------|-------------|------------|----------|
| SAMPLE      |             | DEC. & VT  |          |
| date        | Sep 30 2007 | dfrq       | 499.701  |
| solvent     | CD3CN       | dn         | H1       |
| file        | exp         | dpwr       | 44       |
| ACQUISITION |             | dof        | -827.6   |
| sfrq        | 125.663     | dm         | YFY      |
| tn          | C13         | dmm        | w        |
| at          | 1.086       | dmf        | 12000    |
| np          | 65536       | dseq       |          |
| sw          | 30165.9     | dres       | 90.0     |
| fb          | 16600       | homo       | n        |
| bs          | 16          | PROCESSING |          |
| ss          | 1           | lb         | 1.00     |
| tpwr        | 53          | wtfile     |          |
| pw          | 6.0         | proc       | ft       |
| d1          | 1.000       | fn         | not used |
| tof         | 1884.7      | math       | f        |
| nt          | 7777        |            |          |
| ct          | 3263        | werr       |          |
| alock       | n           | wexp       |          |
| gain        | not used    | wbs        |          |
| FLAGS       |             | wnt        |          |
| il          | n           |            |          |
| in          | n           |            |          |
| dp          | y           |            |          |
| hs          | nn          |            |          |
| DISPLAY     |             |            |          |
| sp          | -1131.0     |            |          |
| wp          | 28588.9     |            |          |
| vs          | 140         |            |          |
| sc          | 0           |            |          |
| wc          | 250         |            |          |
| hzmm        | 114.36      |            |          |
| is          | 500.00      |            |          |
| rf1         | 1337.7      |            |          |
| rfp         | 163.3       |            |          |
| th          | 68          |            |          |
| ins         | 100.000     |            |          |
| nm          | ph          |            |          |

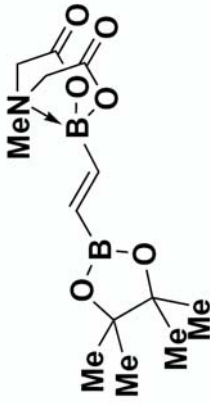

14

200 180 160 140 120 100 80 60 40 20 ppm

LSJI-22-B

exp2 s2pul

|             |         |             |          |          |         |
|-------------|---------|-------------|----------|----------|---------|
| SAMPLE      | date    | Sep 30 2007 | temp     | not used | SPECIAL |
| solvent     | CD3CN   | gain        | 52       |          |         |
| file        | exp     | spin        | not used |          |         |
| ACQUISITION | hst     | 0.008       |          |          |         |
| sw          | 80000.0 | pw90        | 5.500    |          |         |
| at          | 0.819   | alfa        | 0        |          |         |
| np          | 131072  | FLAGS       |          |          |         |
| fb          | 44000   | il          | n        |          |         |
| bs          | 8       | in          | n        |          |         |
| d1          | 1.000   | dp          | y        |          |         |
| nt          | 250     | hs          | n        |          |         |
| ct          | 250     | PROCESSING  |          |          |         |
| TRANSMITTER | lb      | 5.00        |          |          |         |
| tn          | B11     | fn          | not used |          |         |
| sfrq        | 96.289  | DISPLAY     |          |          |         |
| tof         | 0       | sp          | -3400.9  |          |         |
| tpwr        | 57      | wp          | 10986.3  |          |         |
| pw          | 2.139   | rfl         | 41873.8  |          |         |
| DECOUPLER   | rfp     | 0           |          |          |         |
| dn          | H1      | rp          | 147.1    |          |         |
| dof         | 0       | lp          | -0       |          |         |
| dm          | n       | PLOT        |          |          |         |
| decwave     | w       | wc          | 250      |          |         |
| dpwr        | 38      | sc          | 0        |          |         |
| dmf         | 15000   | vs          | 147      |          |         |
|             |         | th          | 4        |          |         |
|             |         | ai          | cdc      |          |         |
|             |         | ph          |          |          |         |

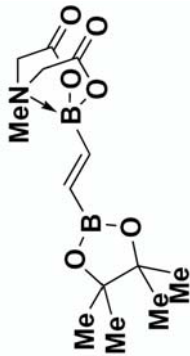

14

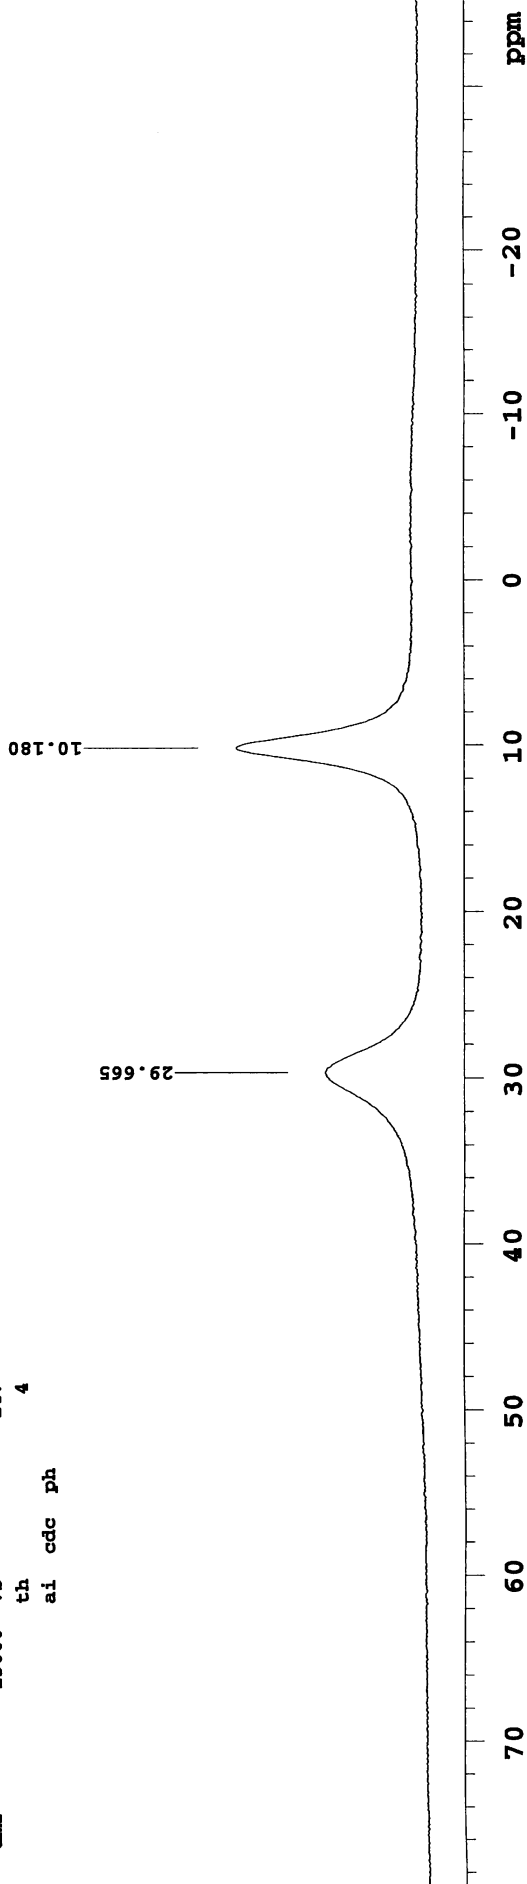

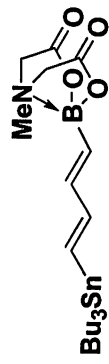

16

$^1\text{H}$ , UI500NB, 500 MHz  
23 °C, acetone- $d_6$

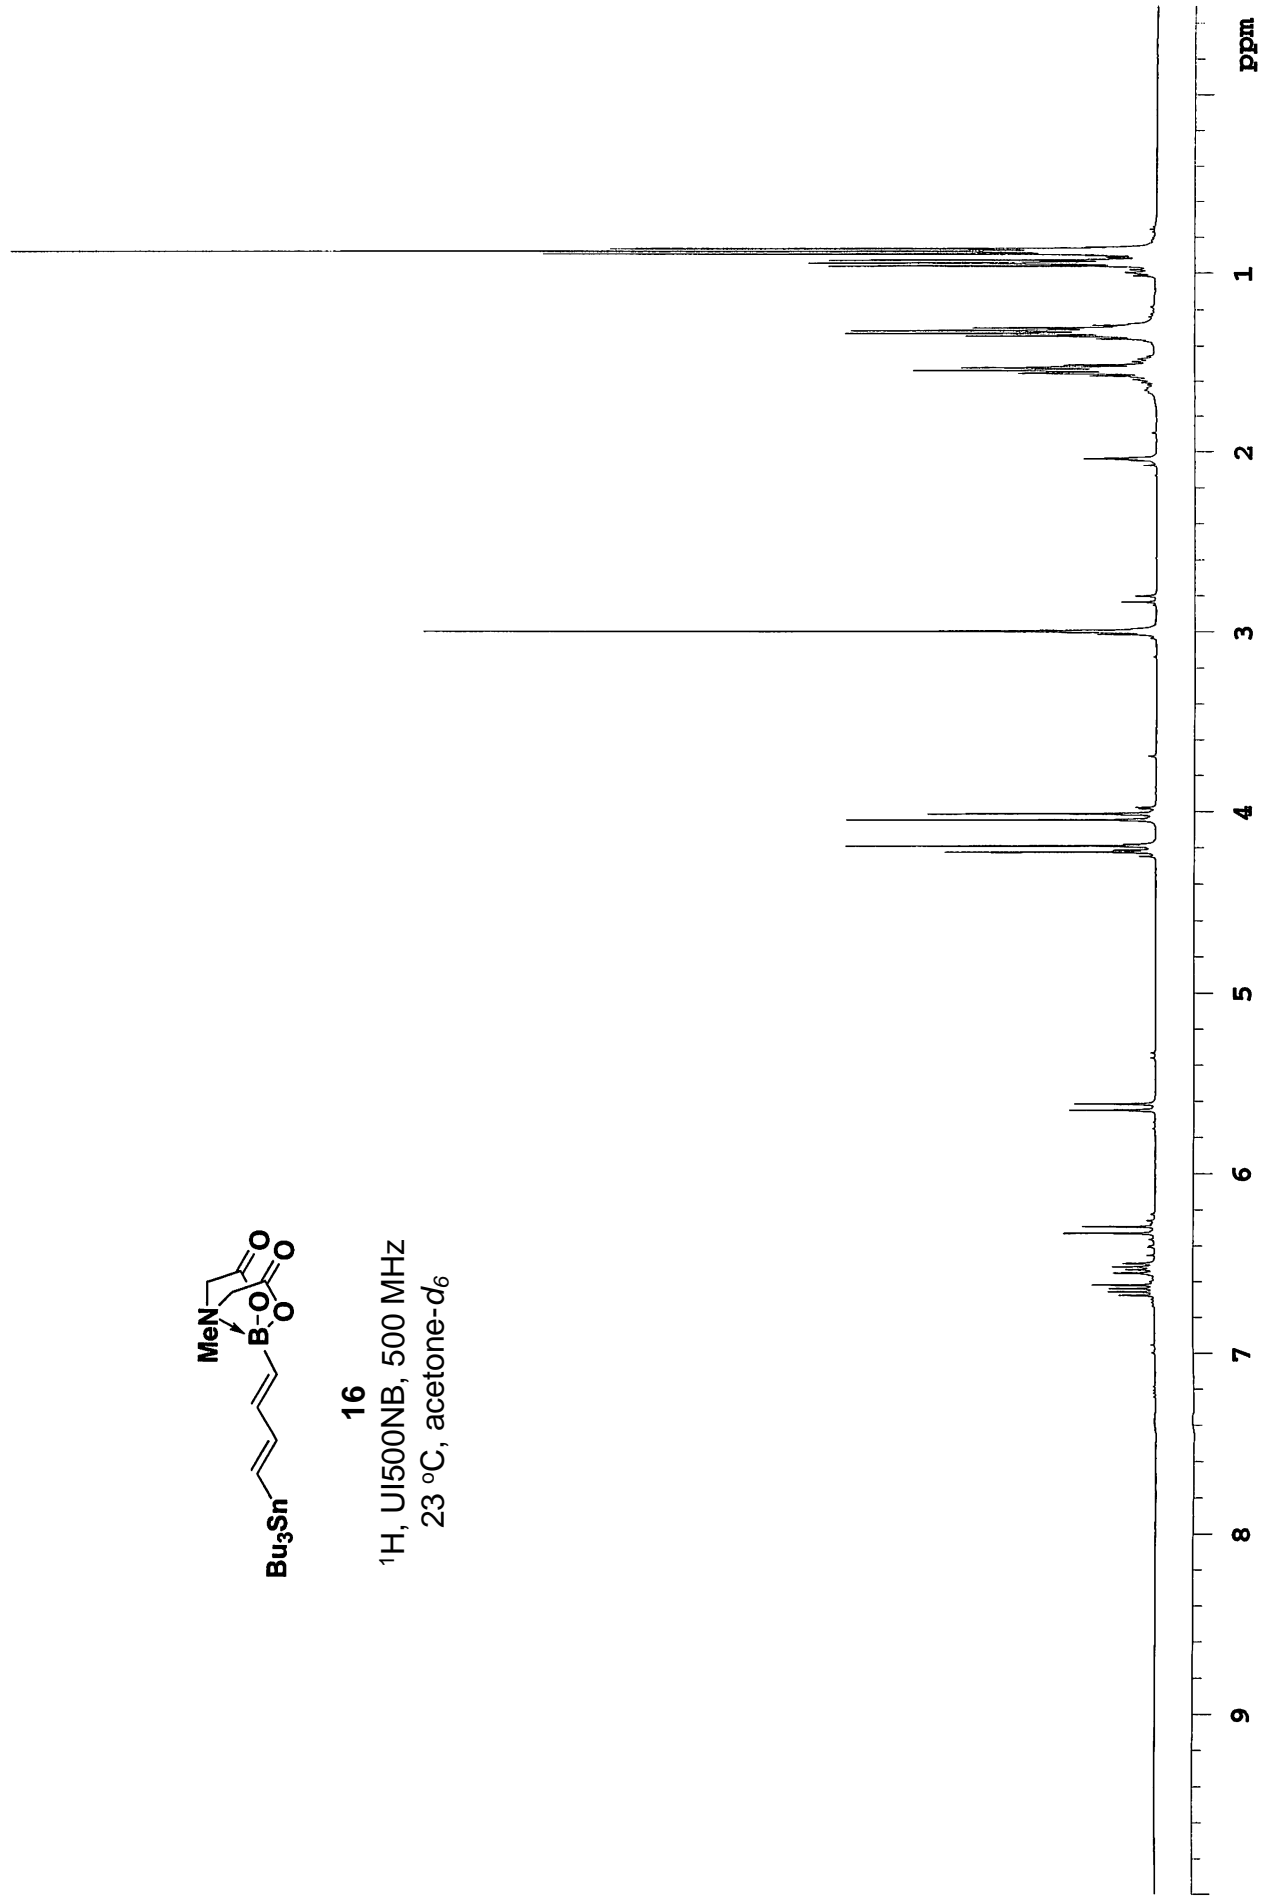

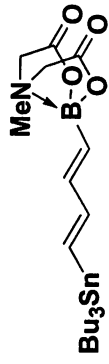

**16**

$^{13}\text{C}$ , VXR500, 125 MHz  
23 °C, acetone- $d_6$

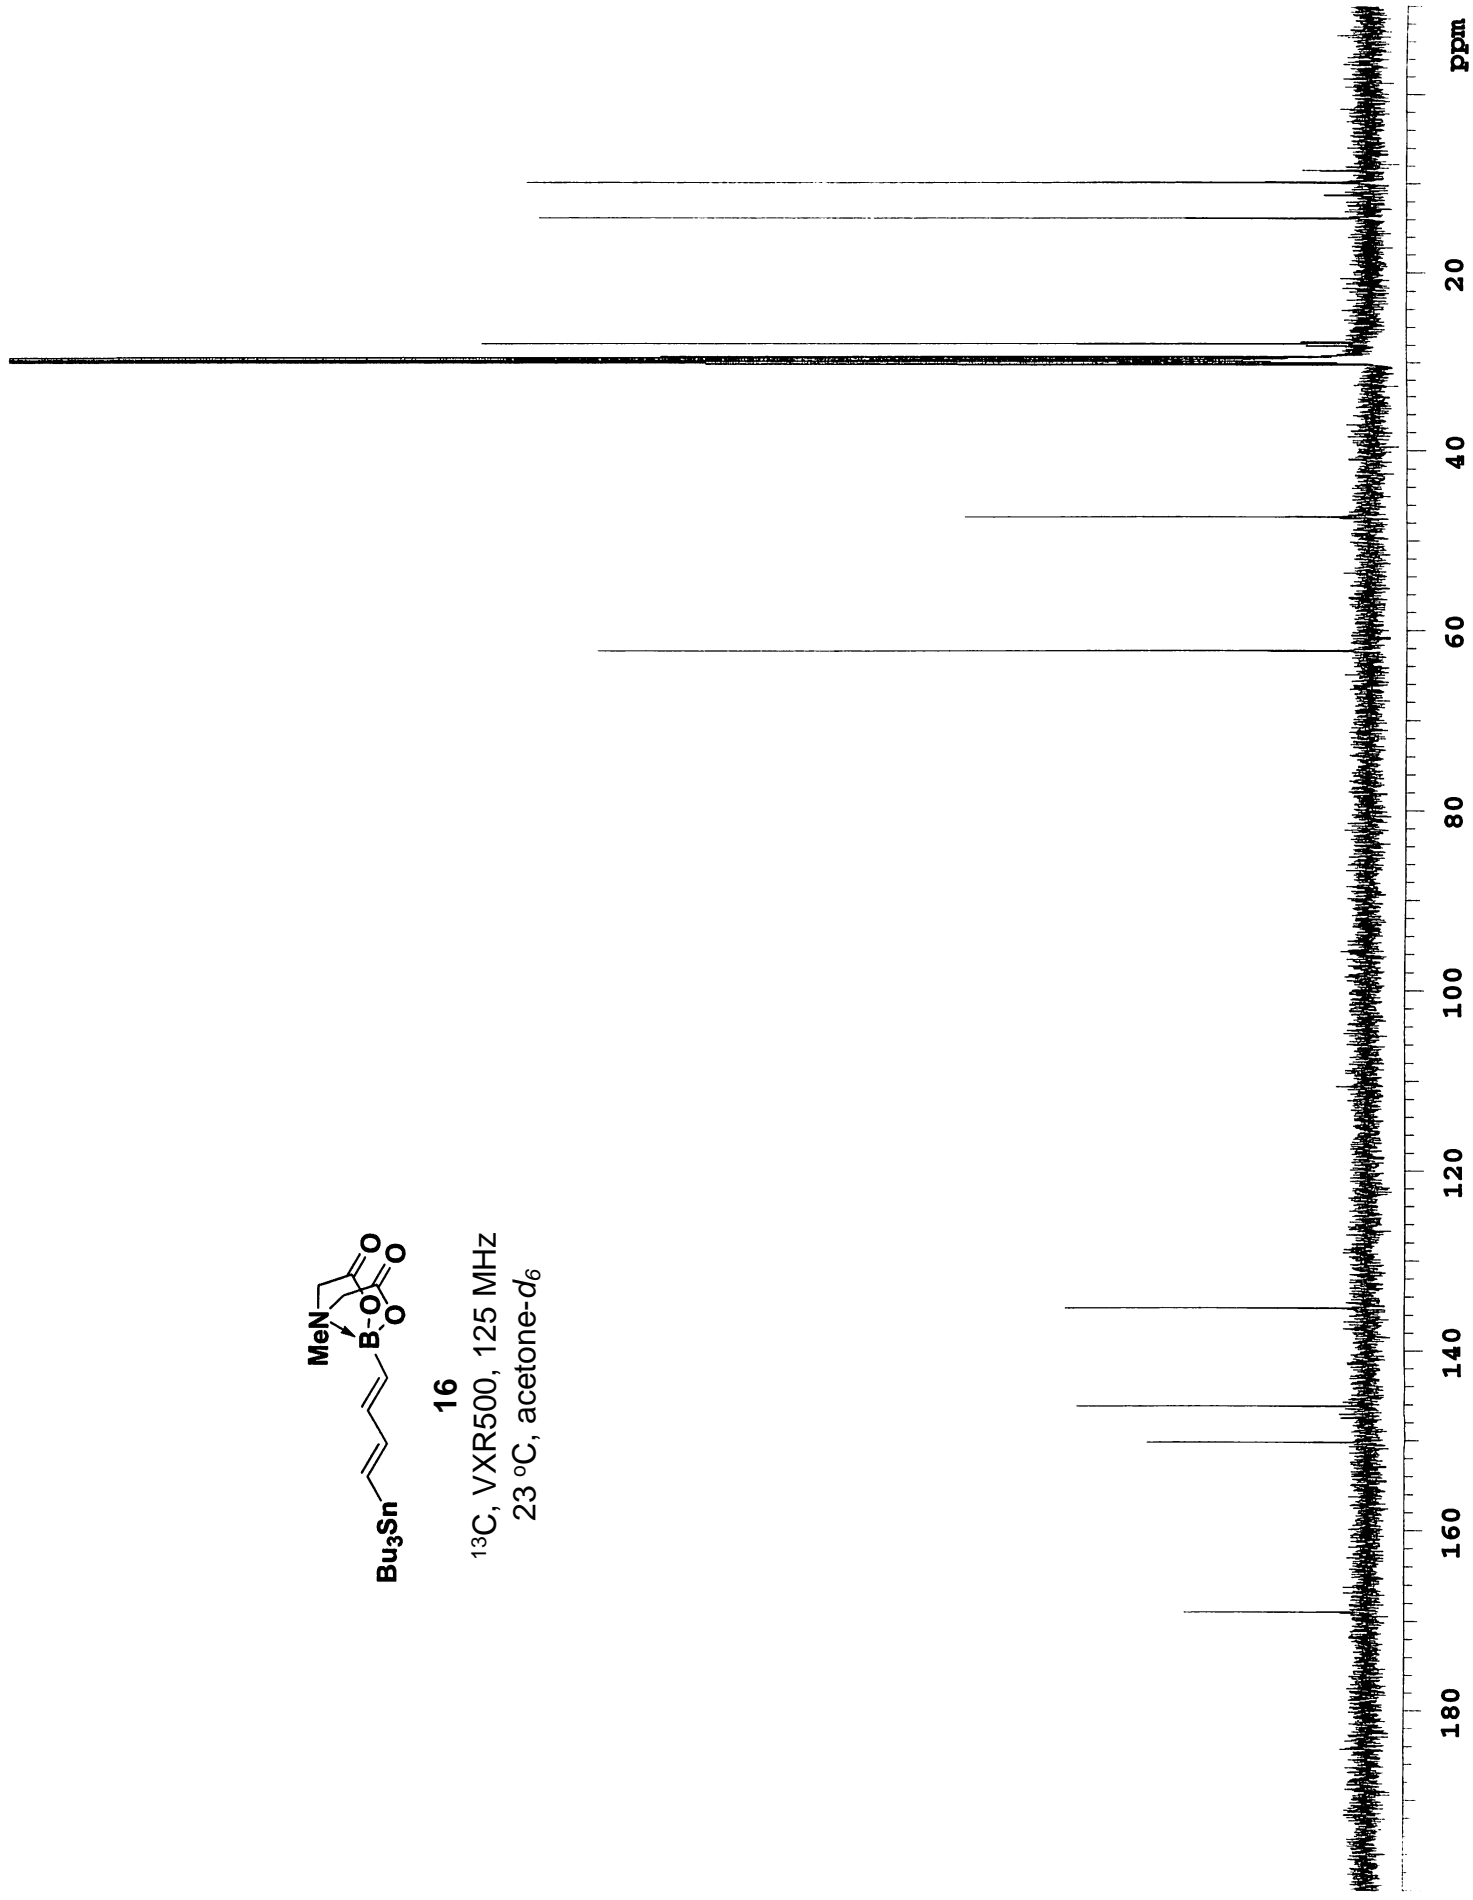

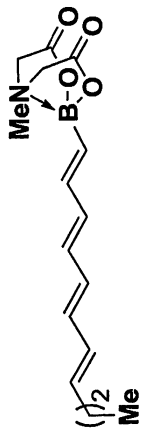

19

<sup>1</sup>H, VXR500, 500 MHz,  
23 °C, acetone-d<sub>6</sub>

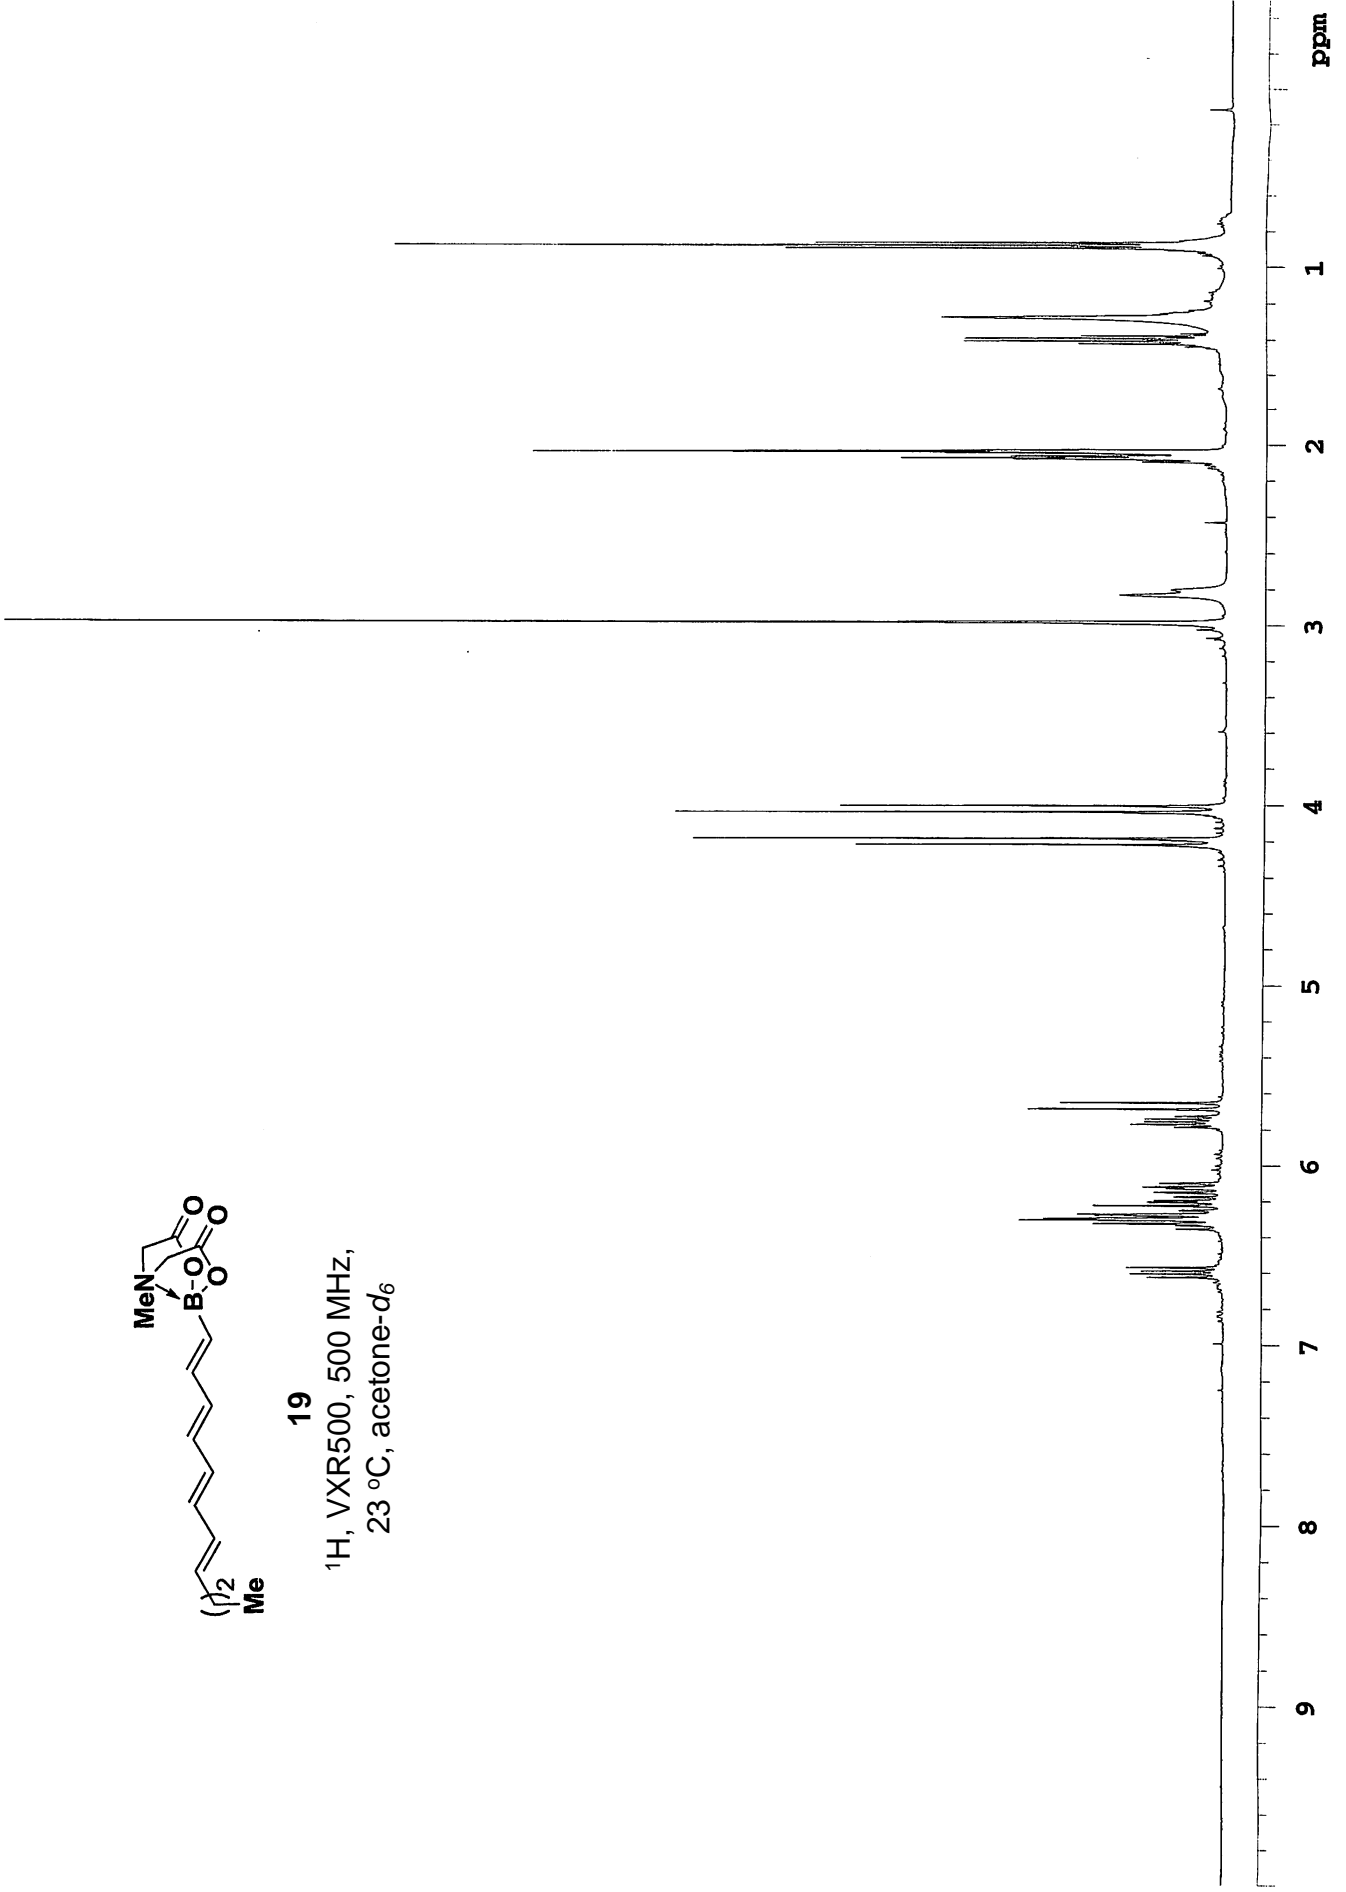

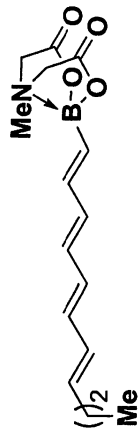

19

$^{13}\text{C}$ , VXR500, 125 MHz  
23 °C, acetone- $d_6$

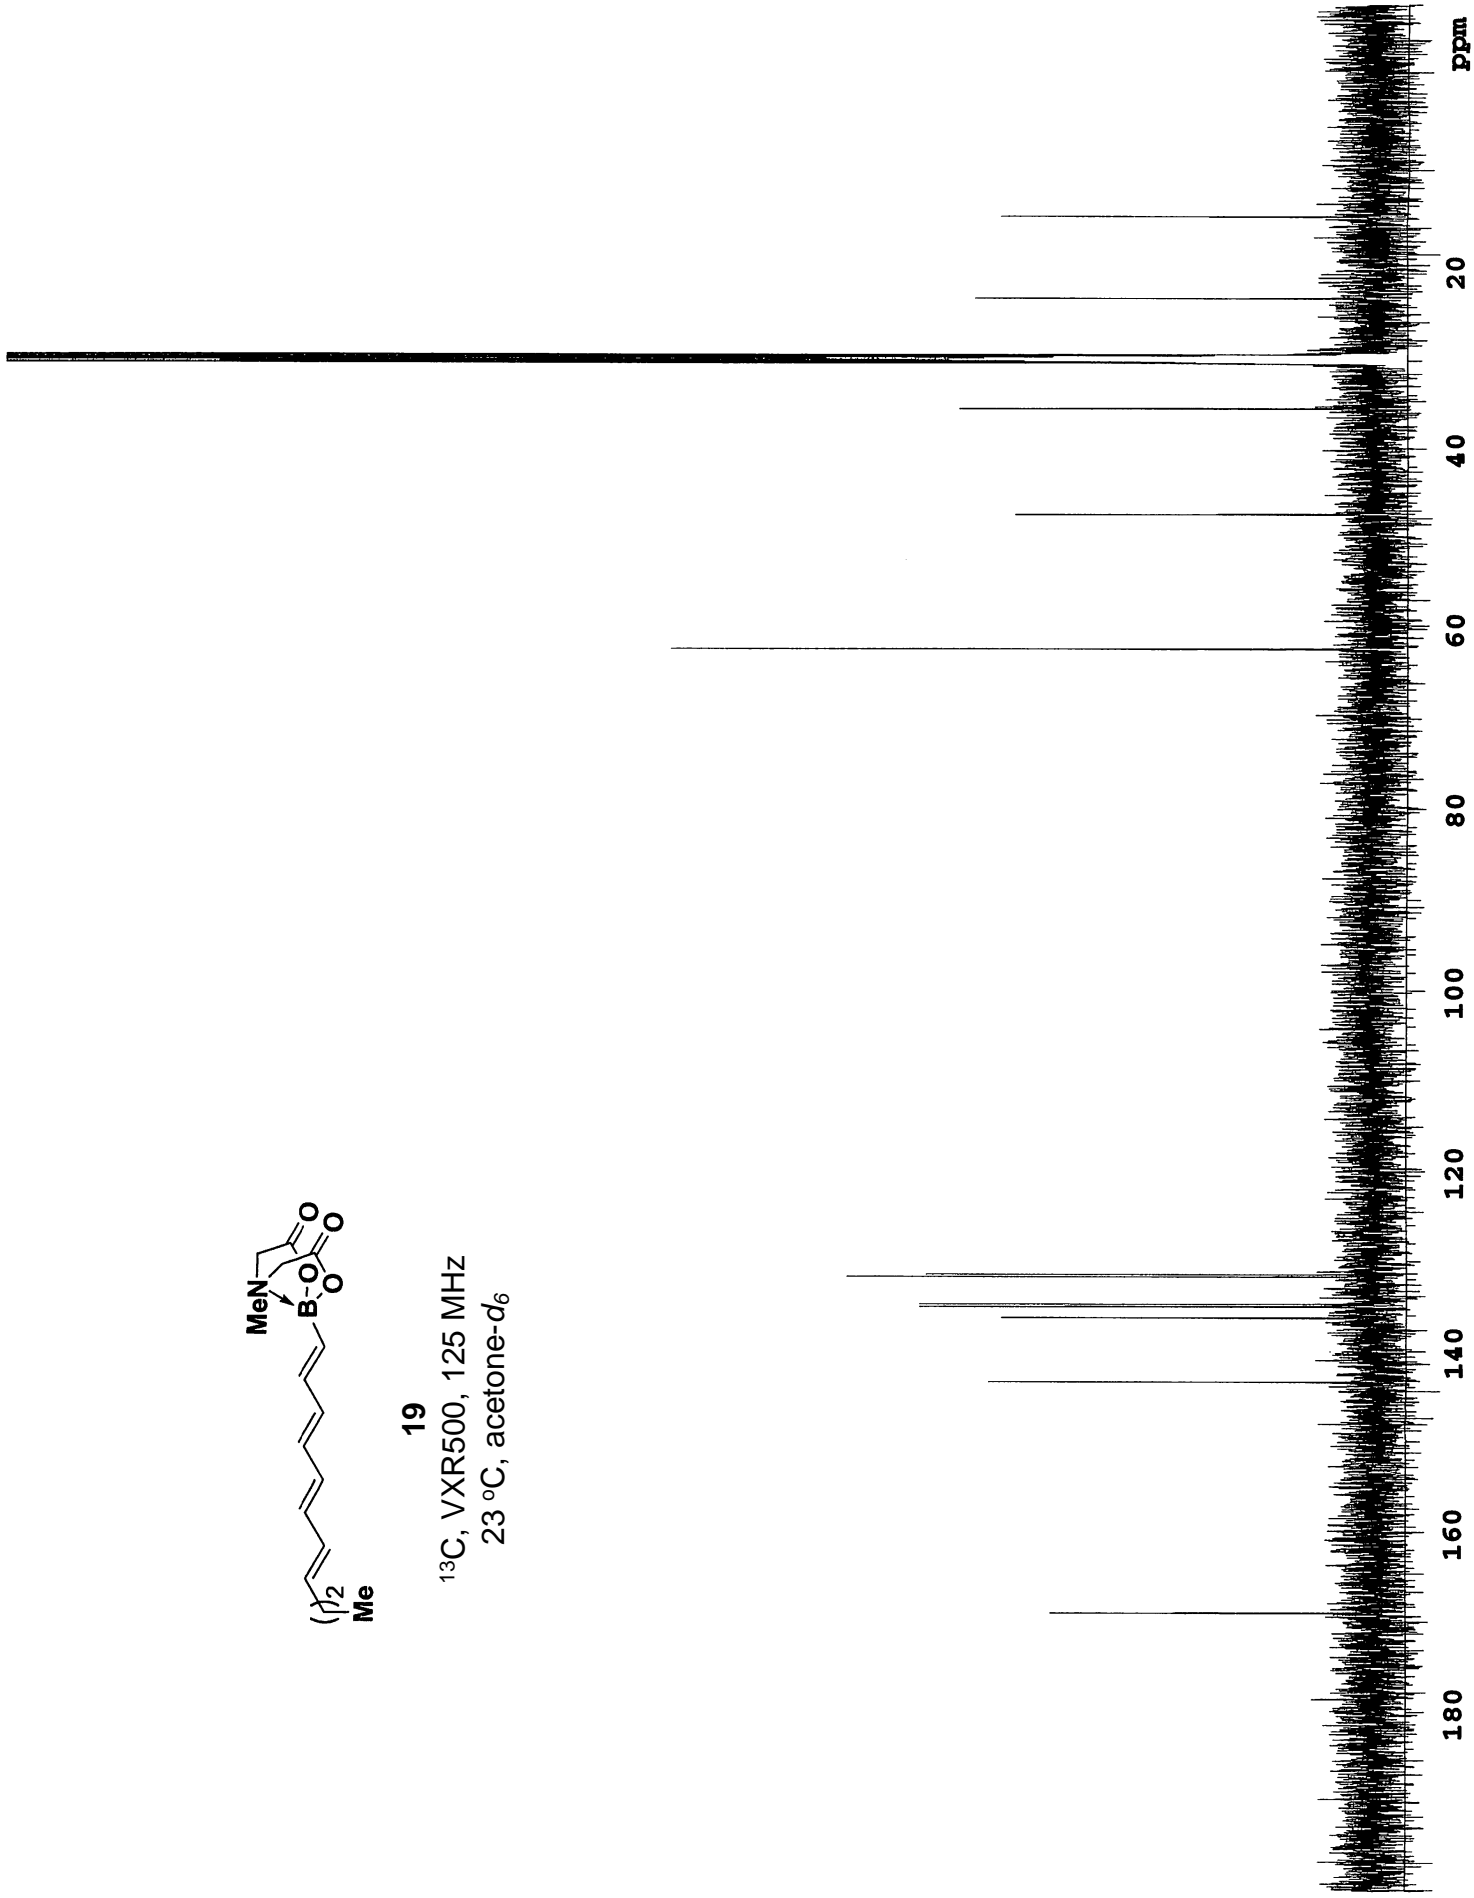



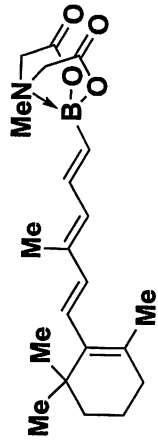

21

<sup>1</sup>H, VXR500, 500 MHz,  
23 °C, acetone-*d*<sub>6</sub>

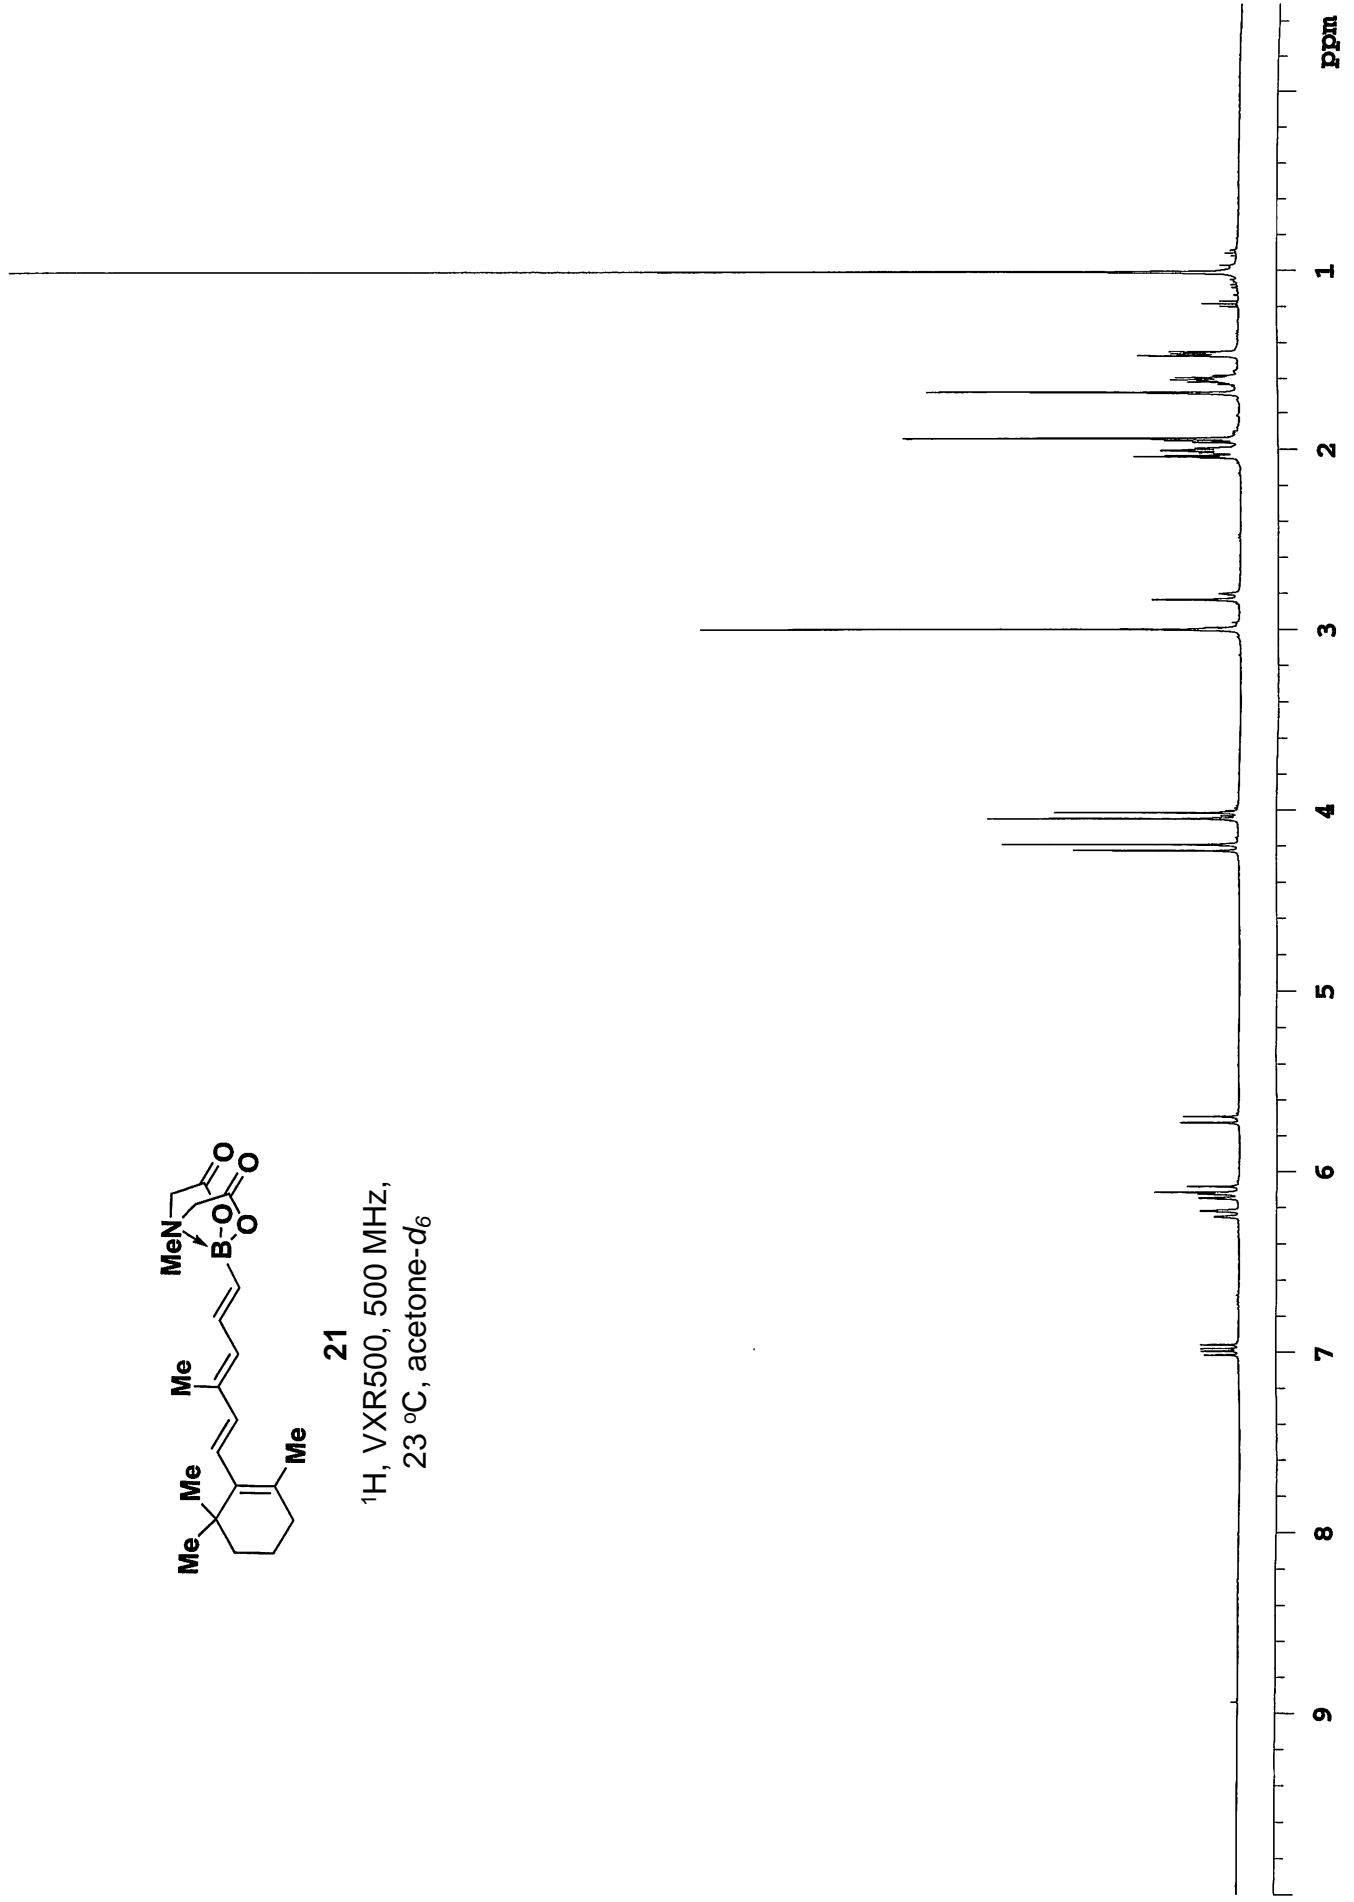

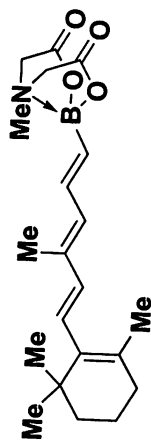

21

$^{13}\text{C}$ , VXR500, 125 MHz,  
23 °C, acetone- $d_6$

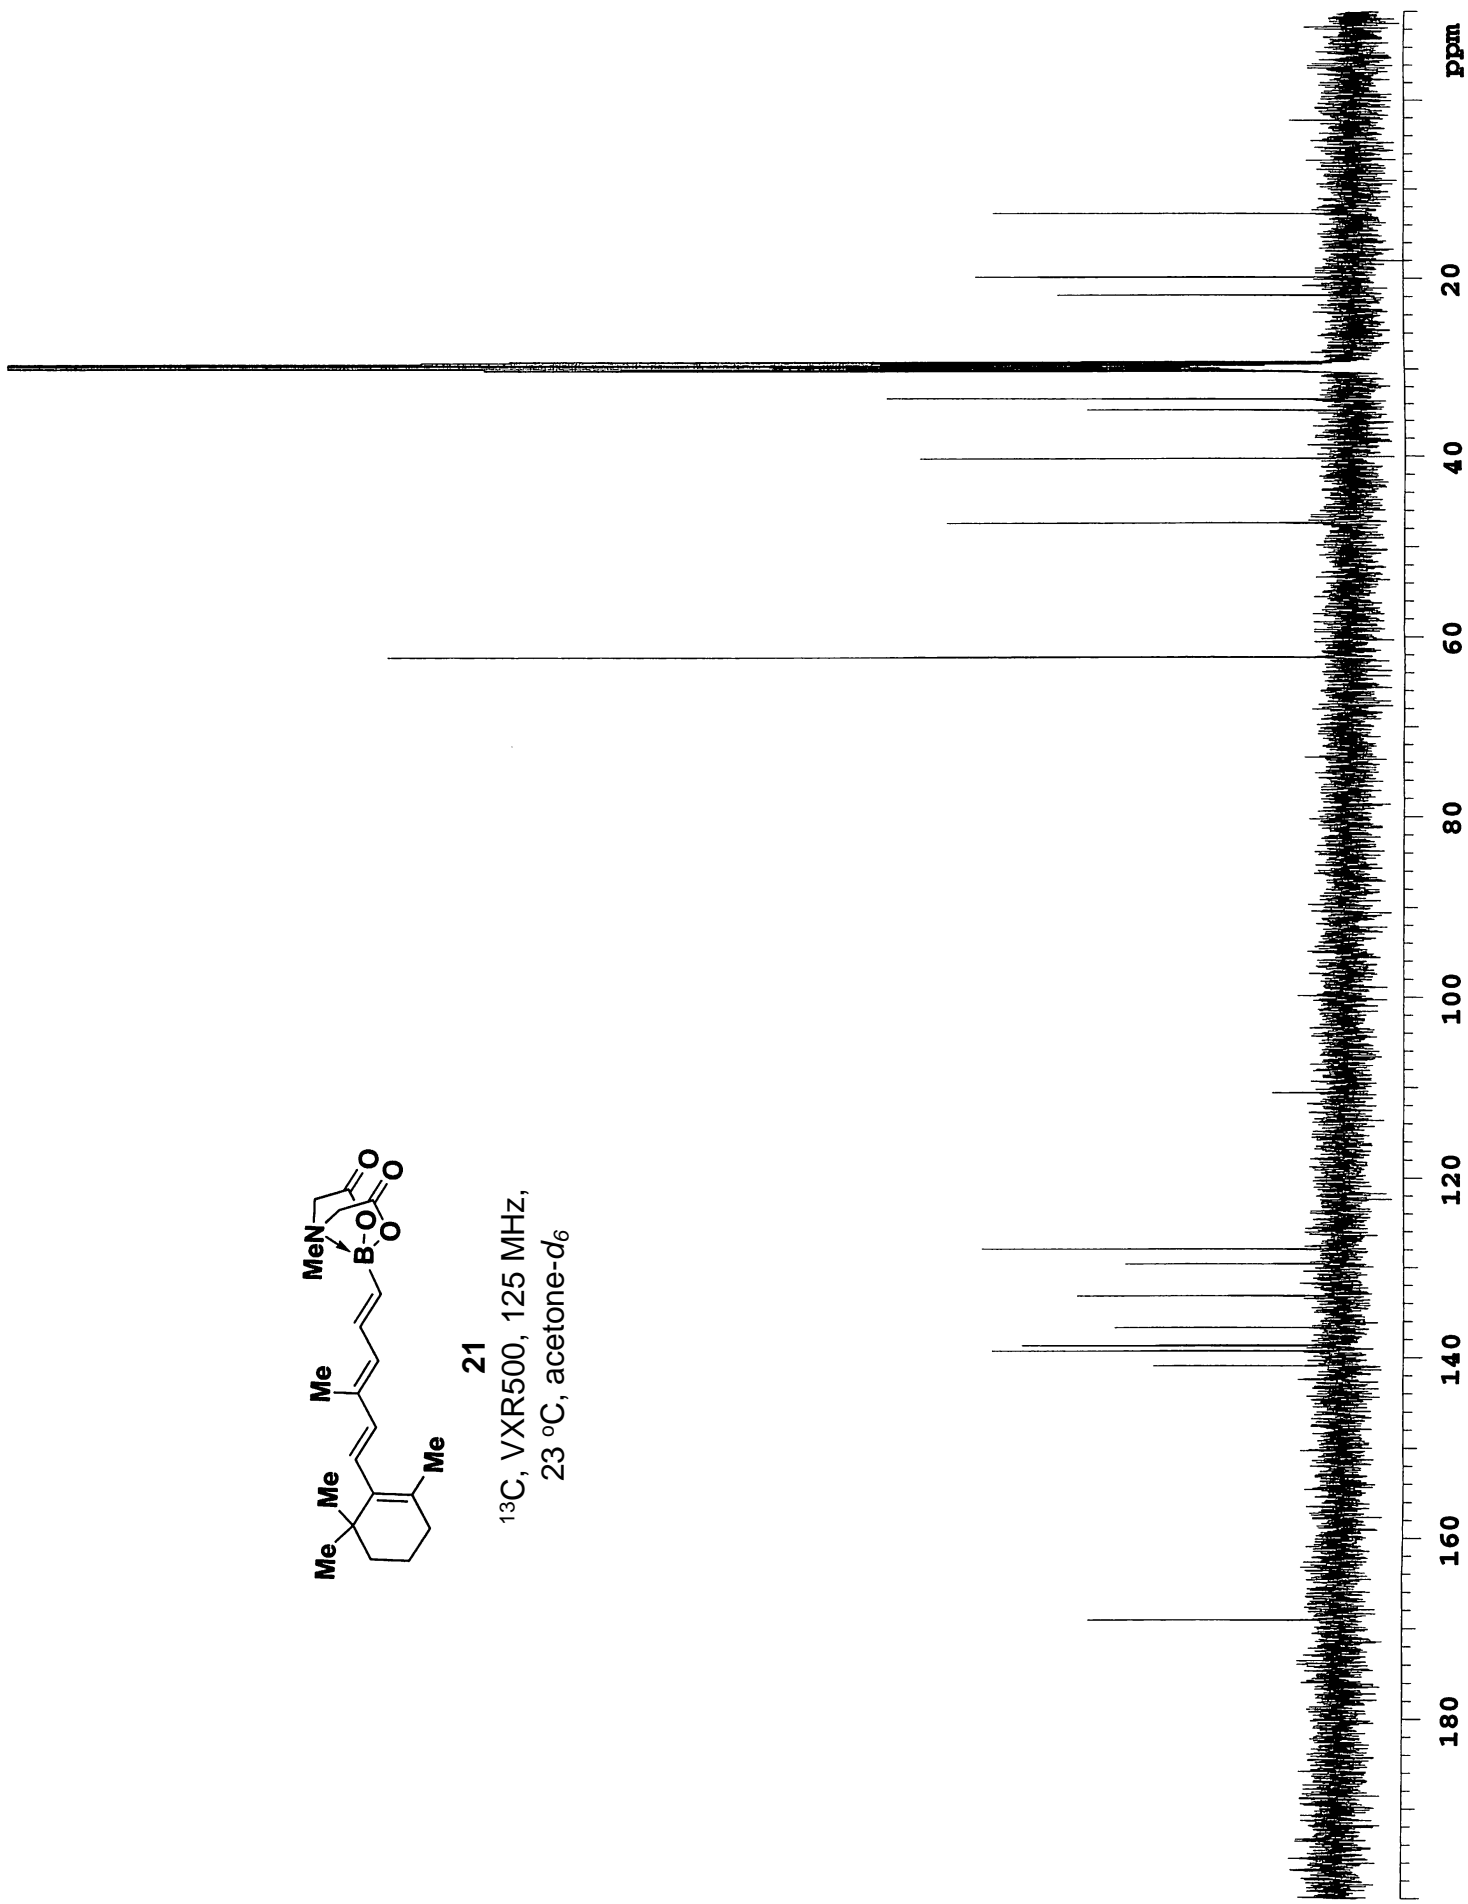

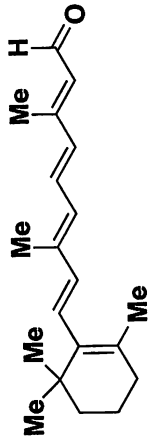

23

<sup>1</sup>H, U400, 400 MHz,  
23 °C, CDCl<sub>3</sub>

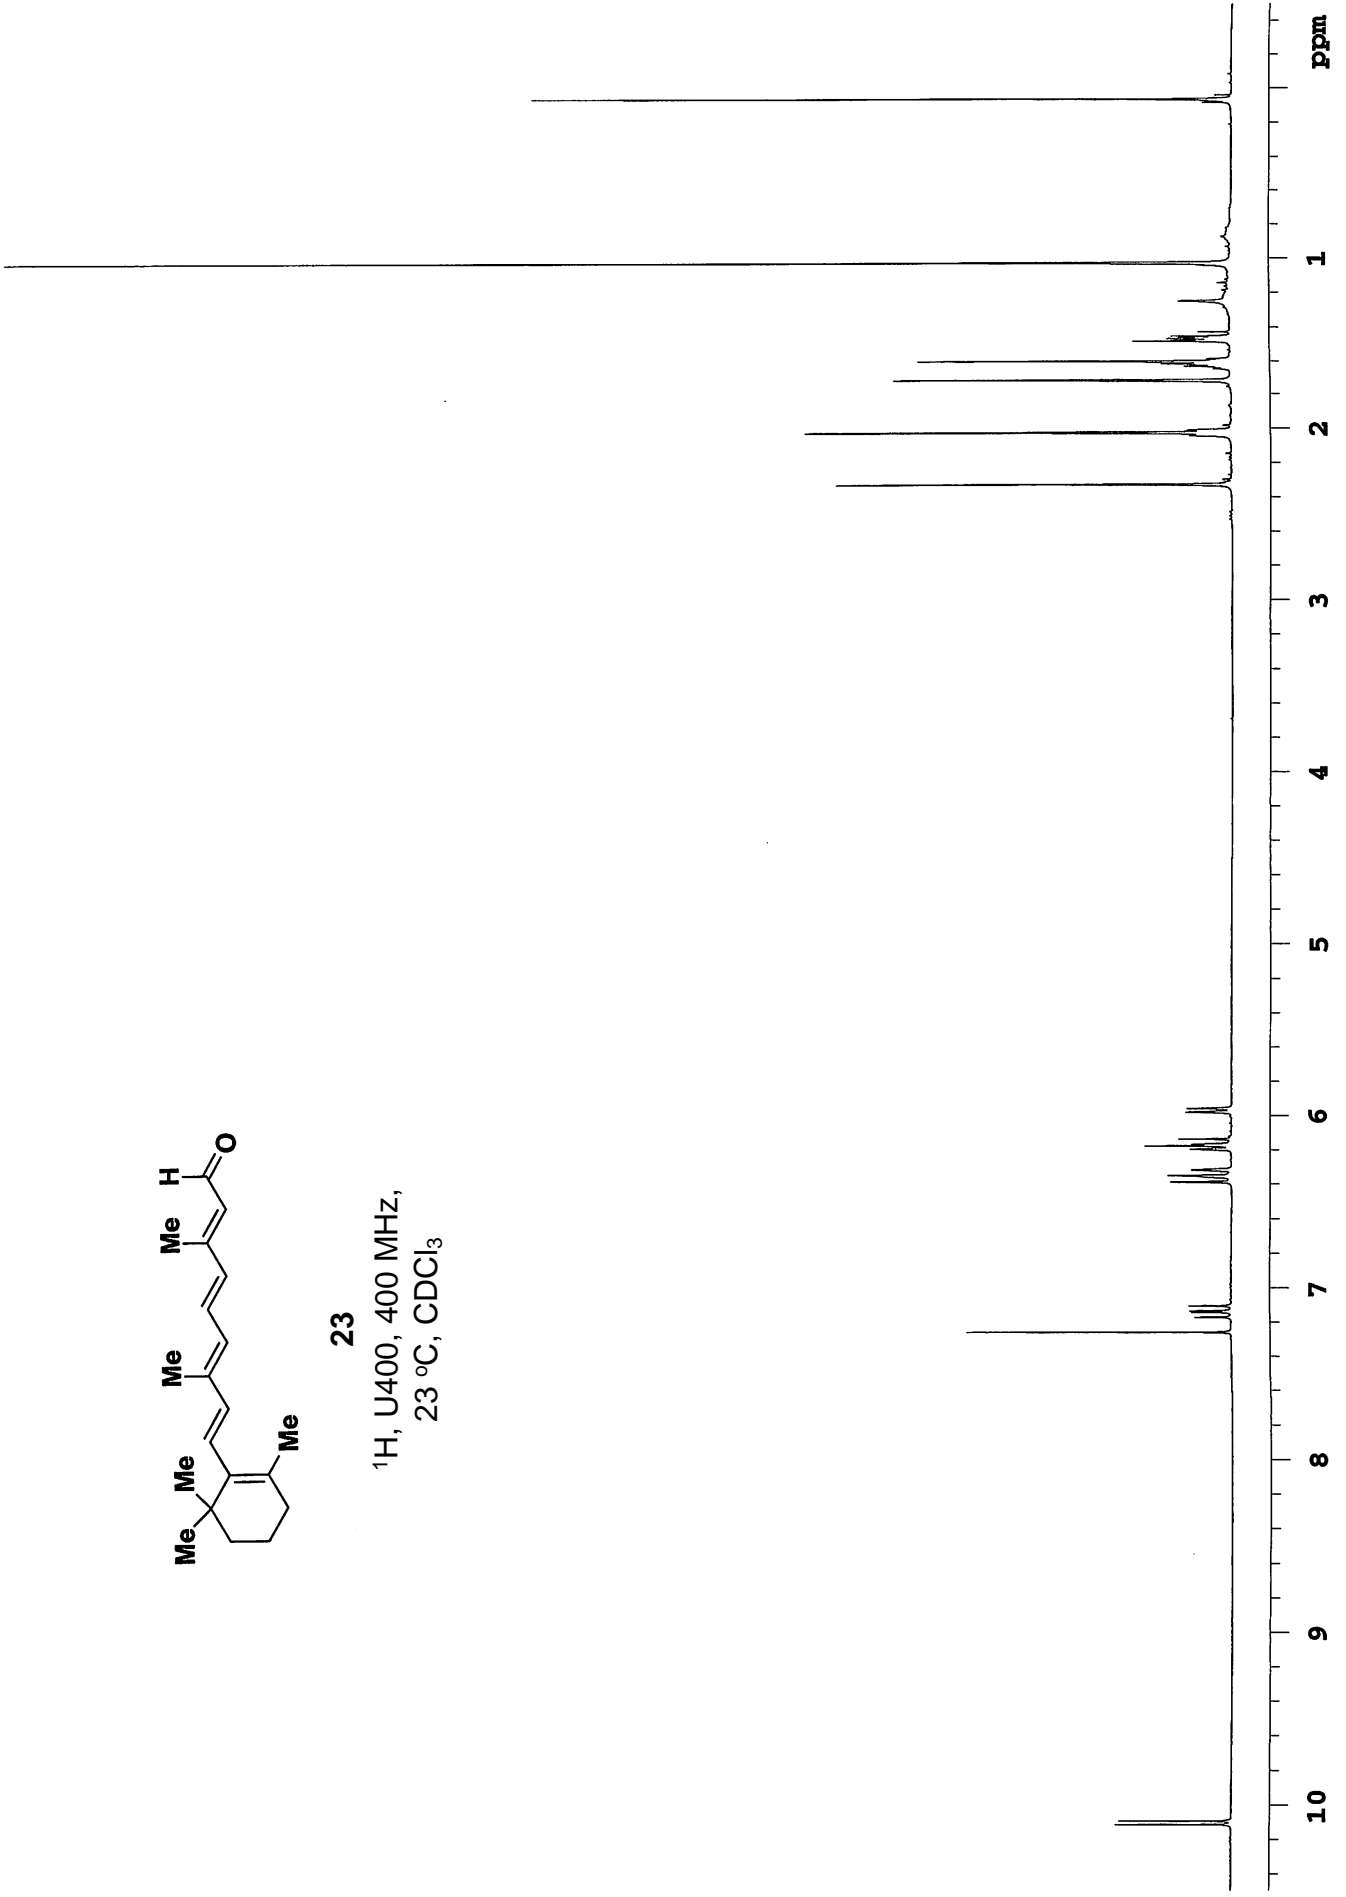

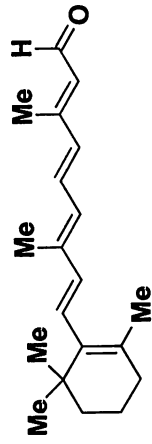

23

$^{13}\text{C}$ , VXR500, 125 MHz,  
23 °C,  $\text{CDCl}_3$

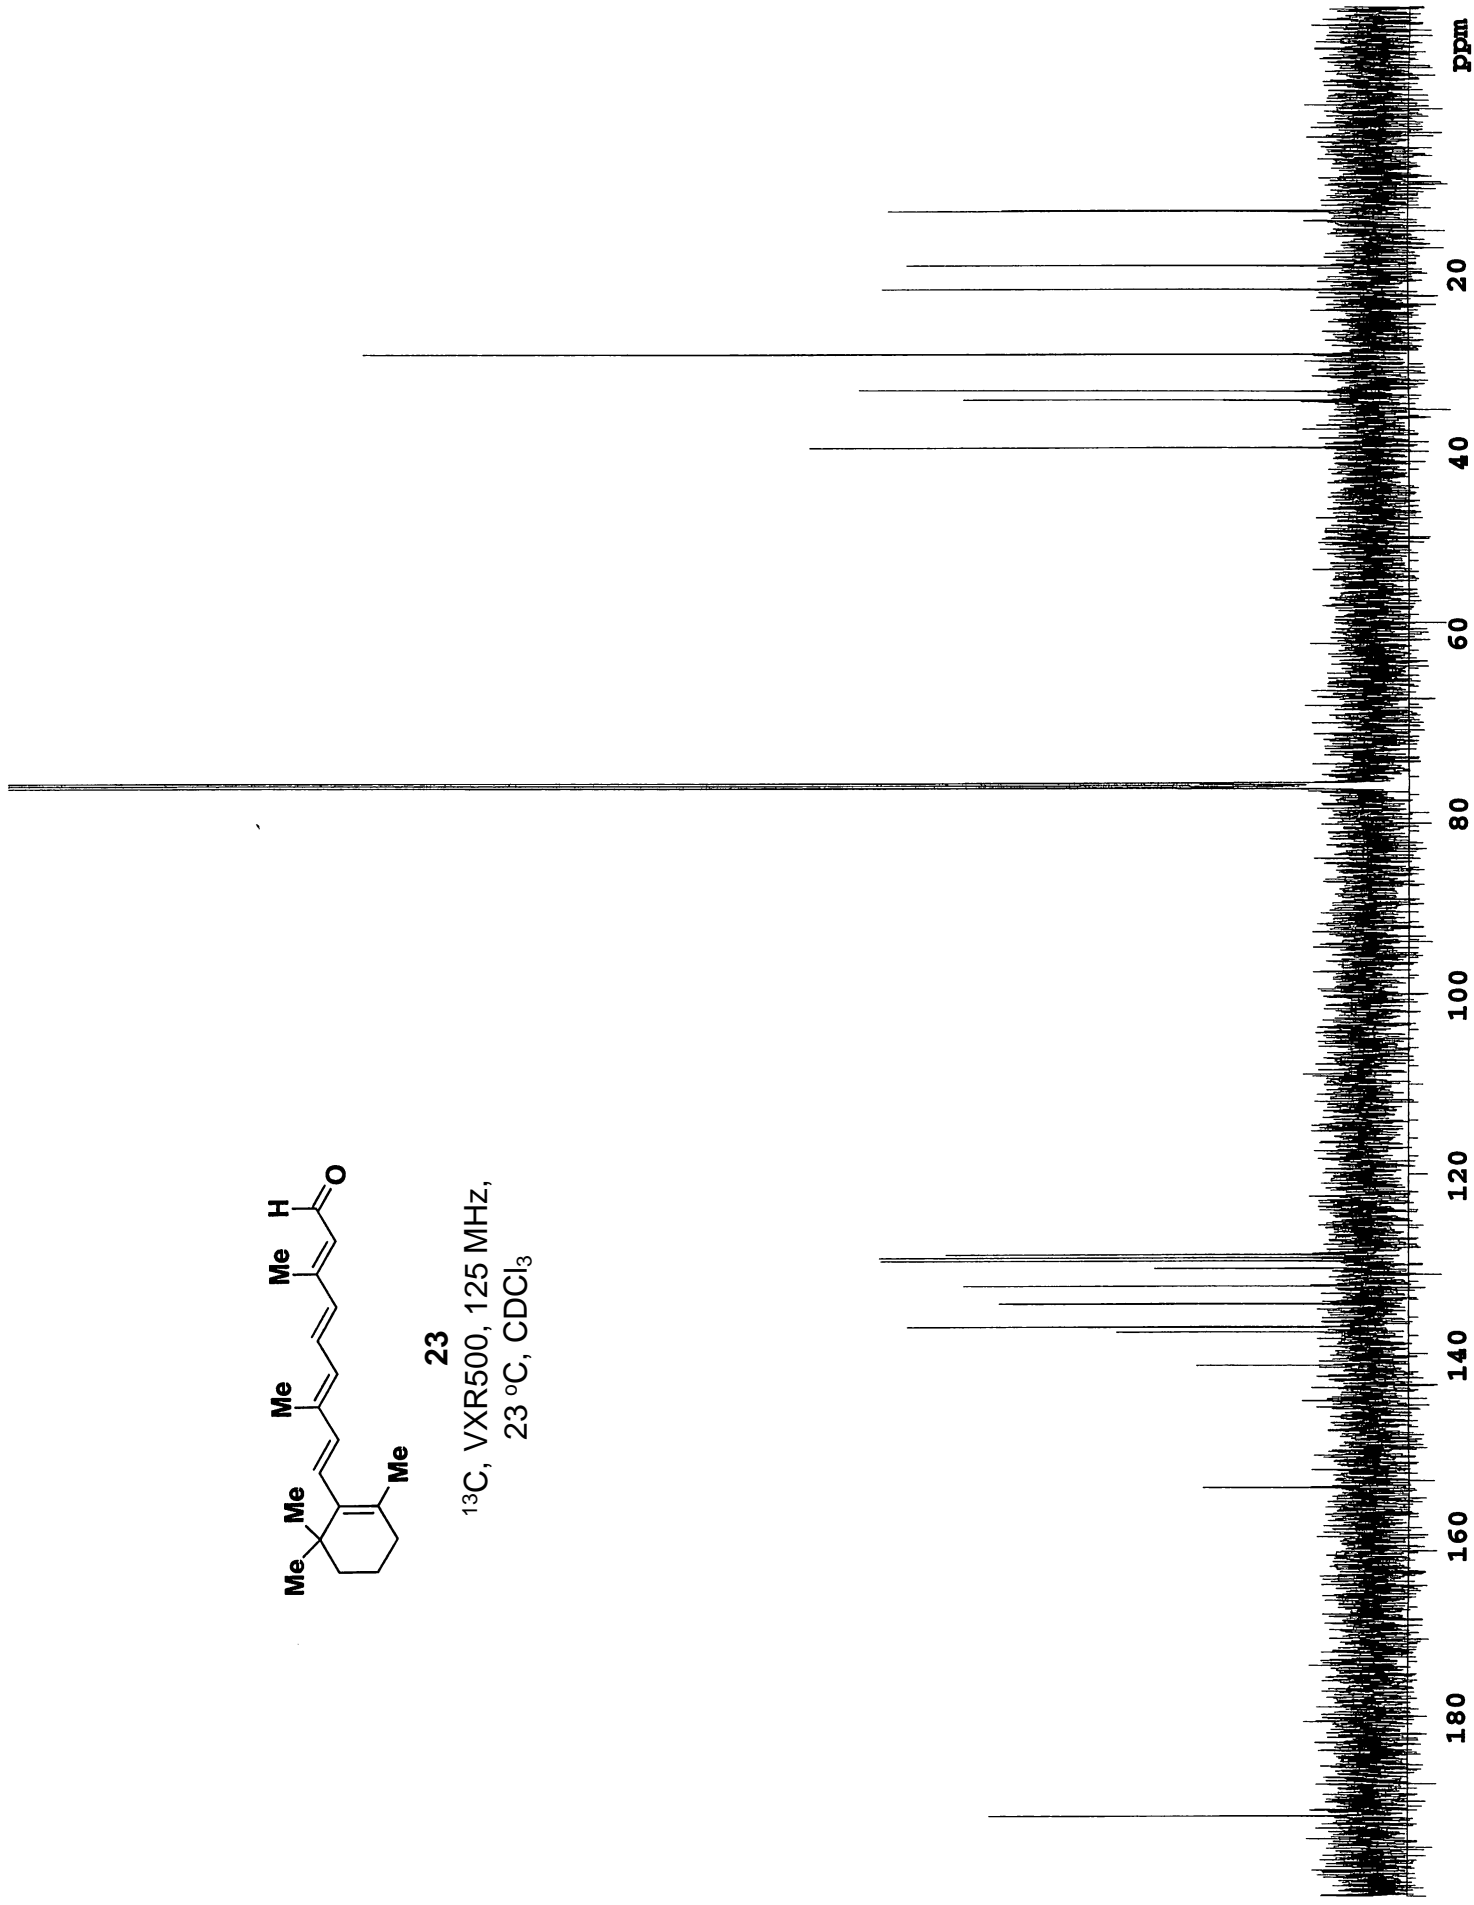

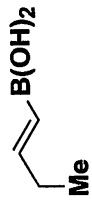

24

<sup>1</sup>H, UI500NB, 500 MHz,  
23 °C, DMSO-*d*<sub>6</sub>:D<sub>2</sub>O 95:5

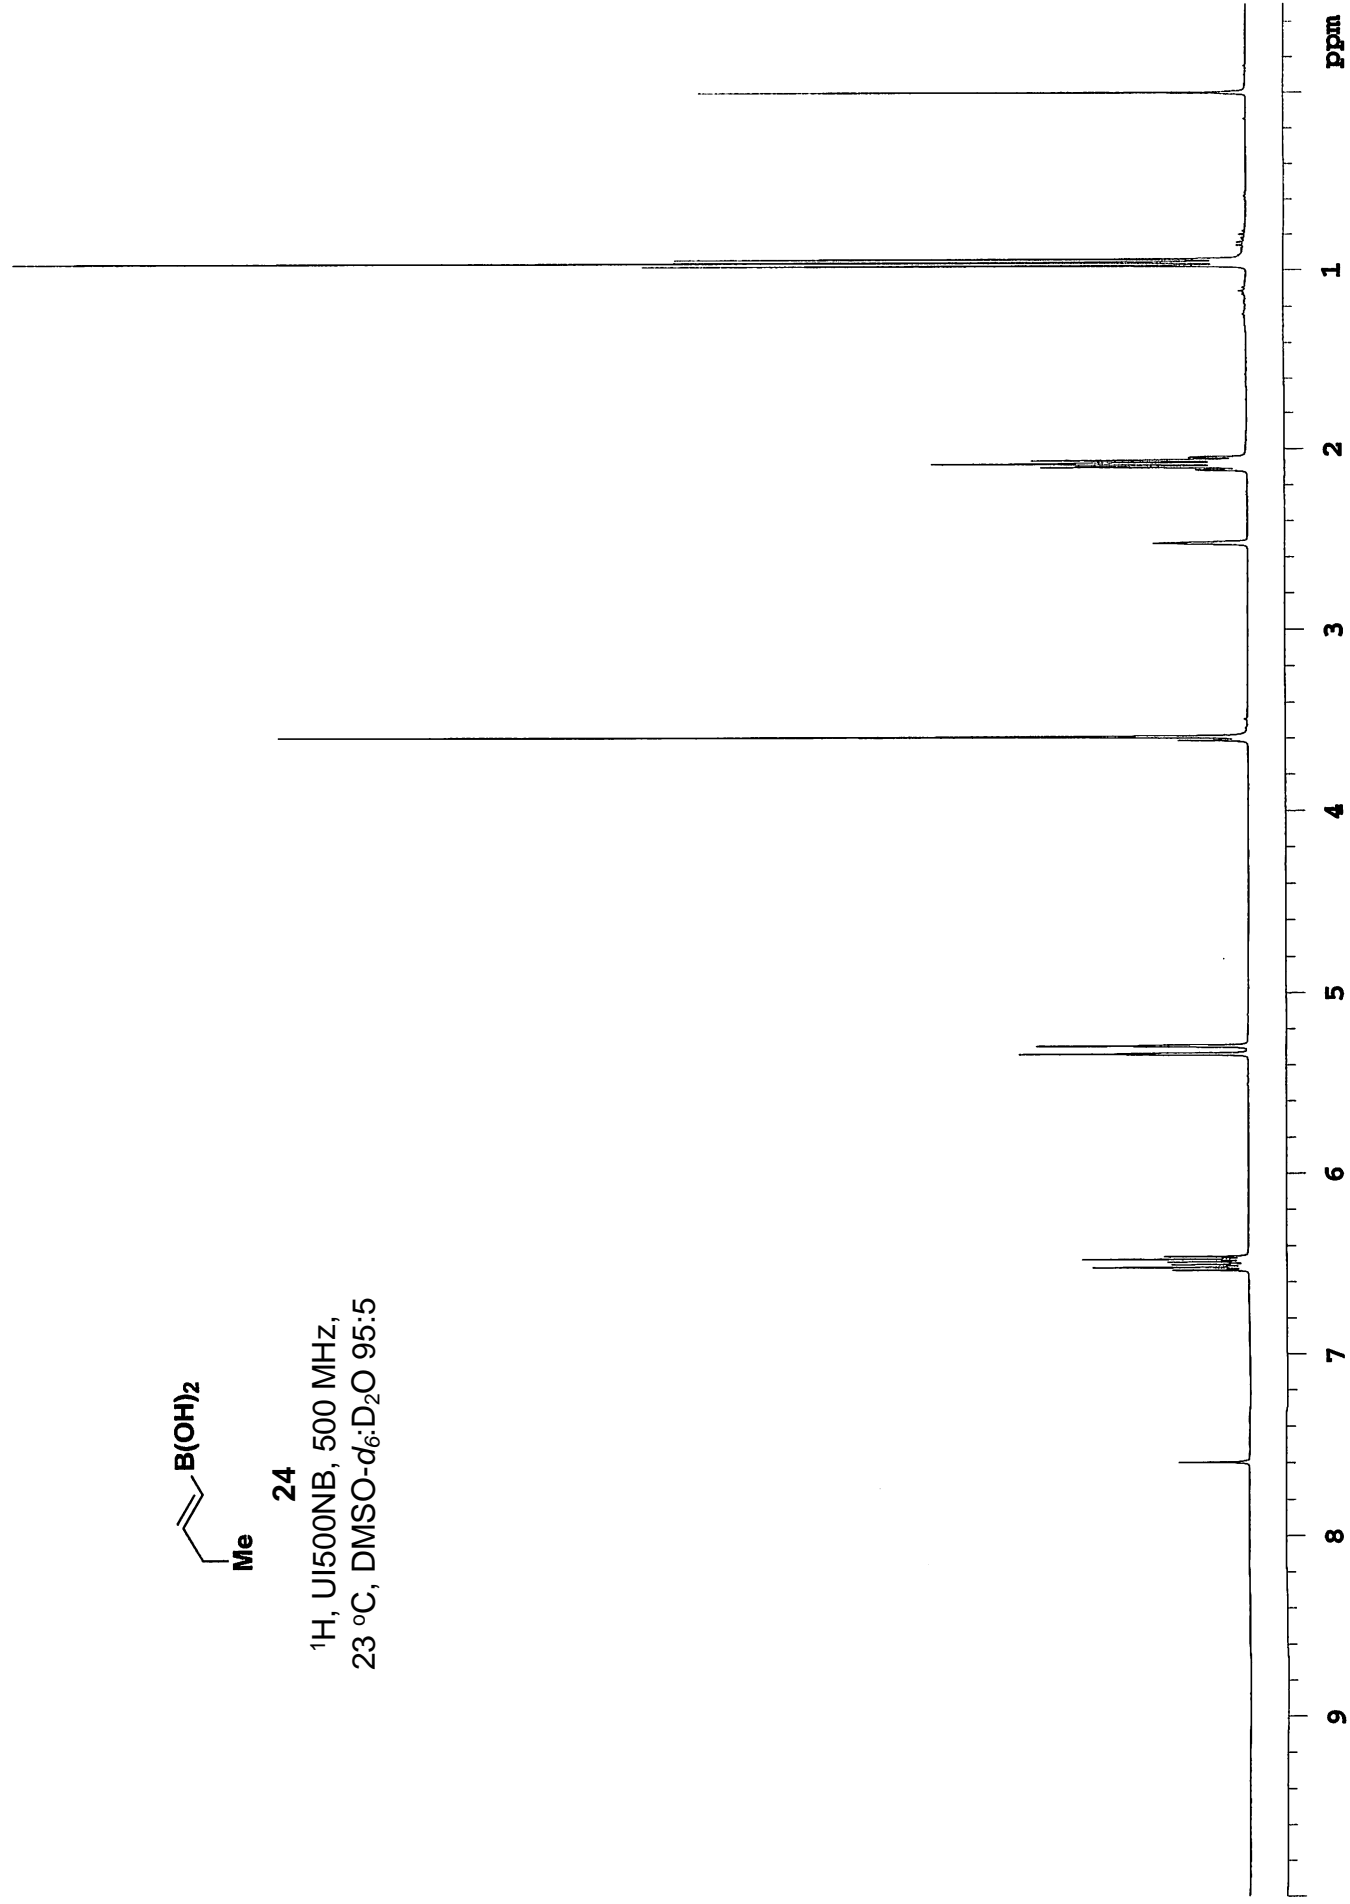

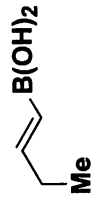

24

$^{13}\text{C}$ , U400, 100 MHz,  
23 °C, DMSO- $d_6$ :D $_2$ O 95:5

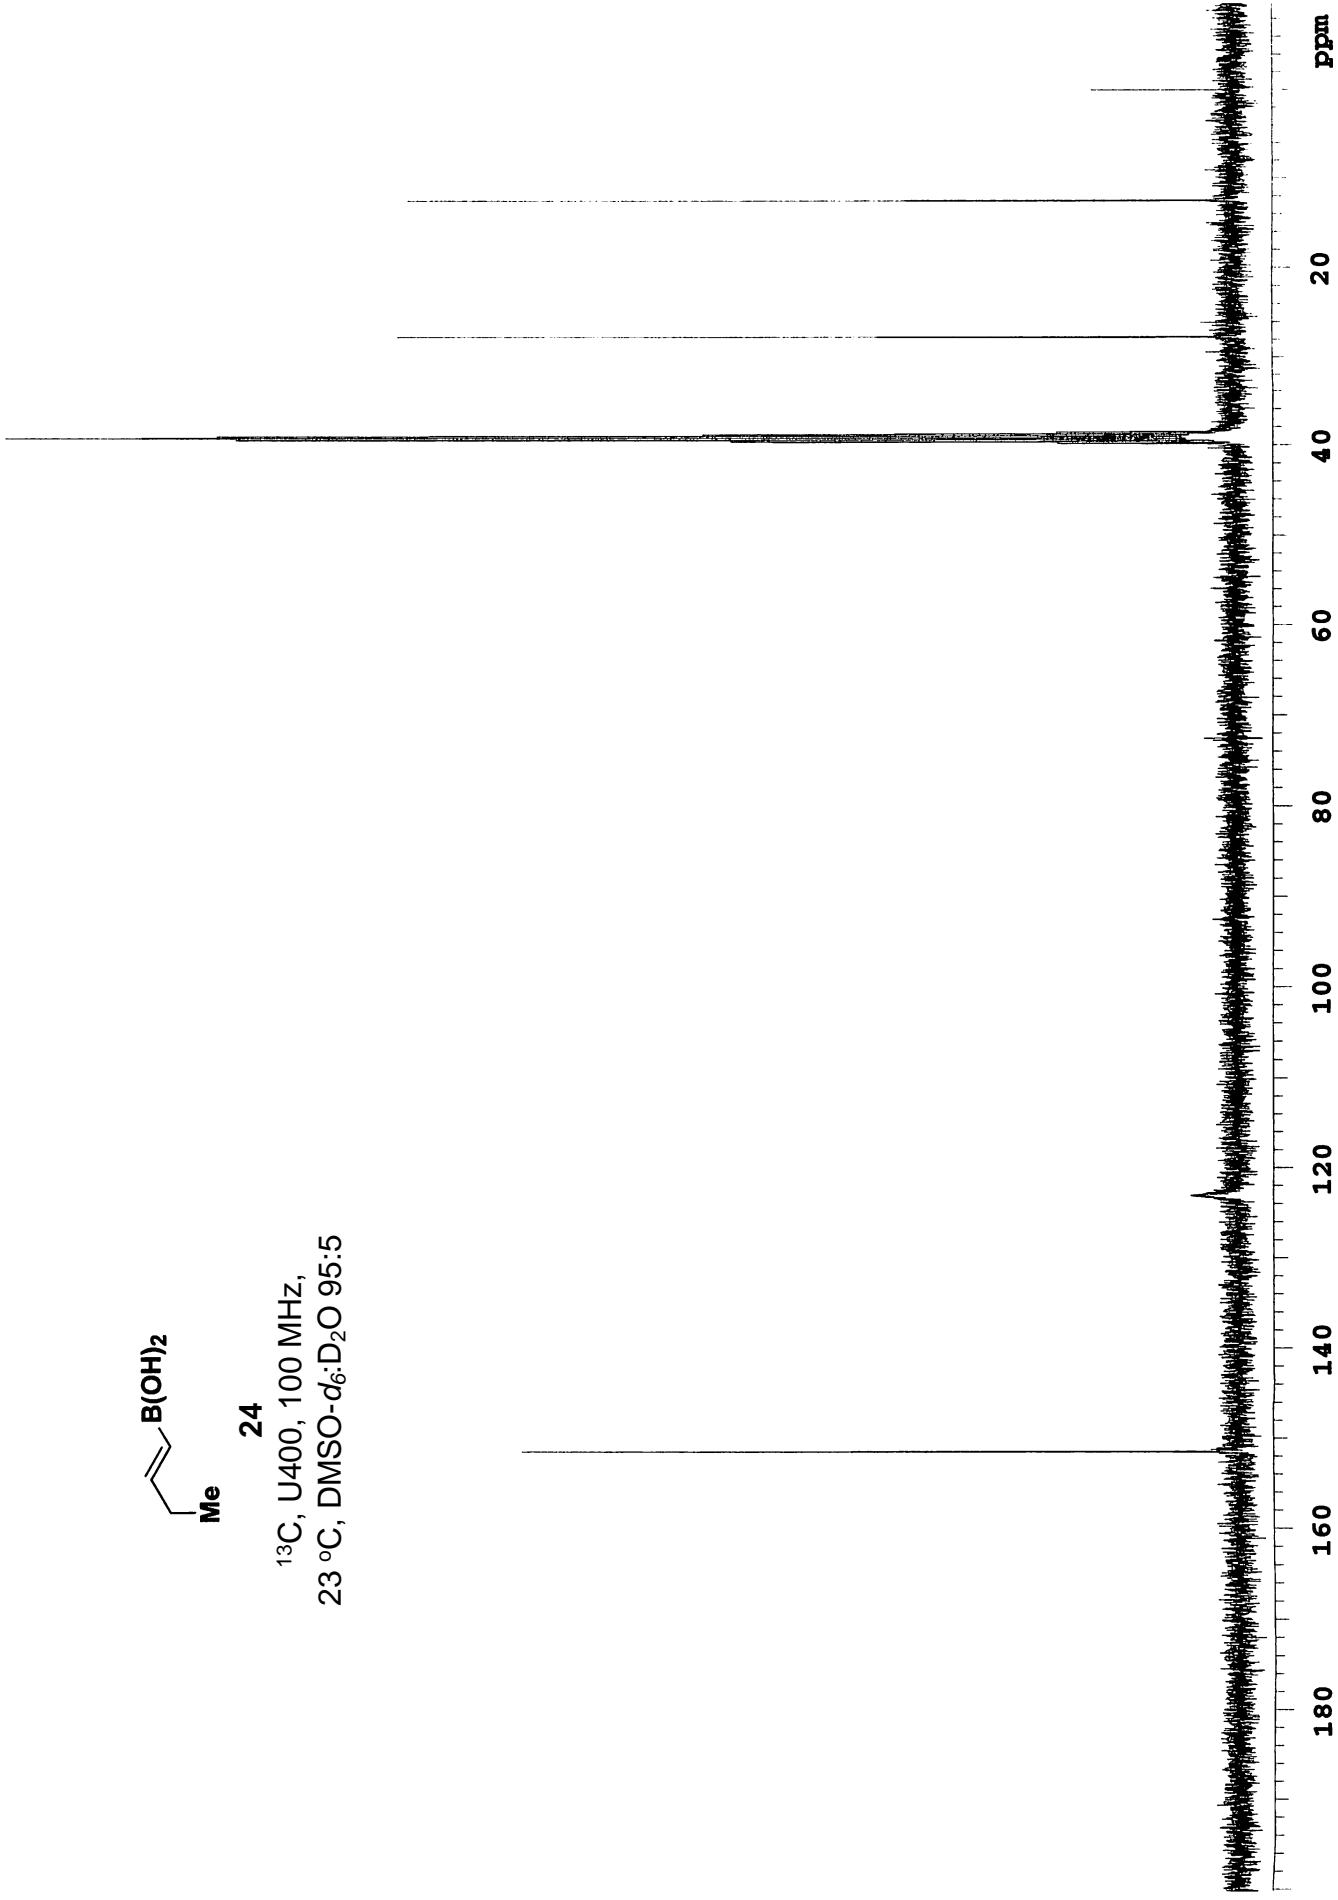

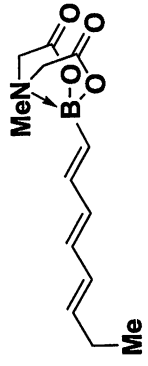

25

$^1\text{H}$ , VXR500, 500 MHz,  
23 °C, acetone- $d_6$

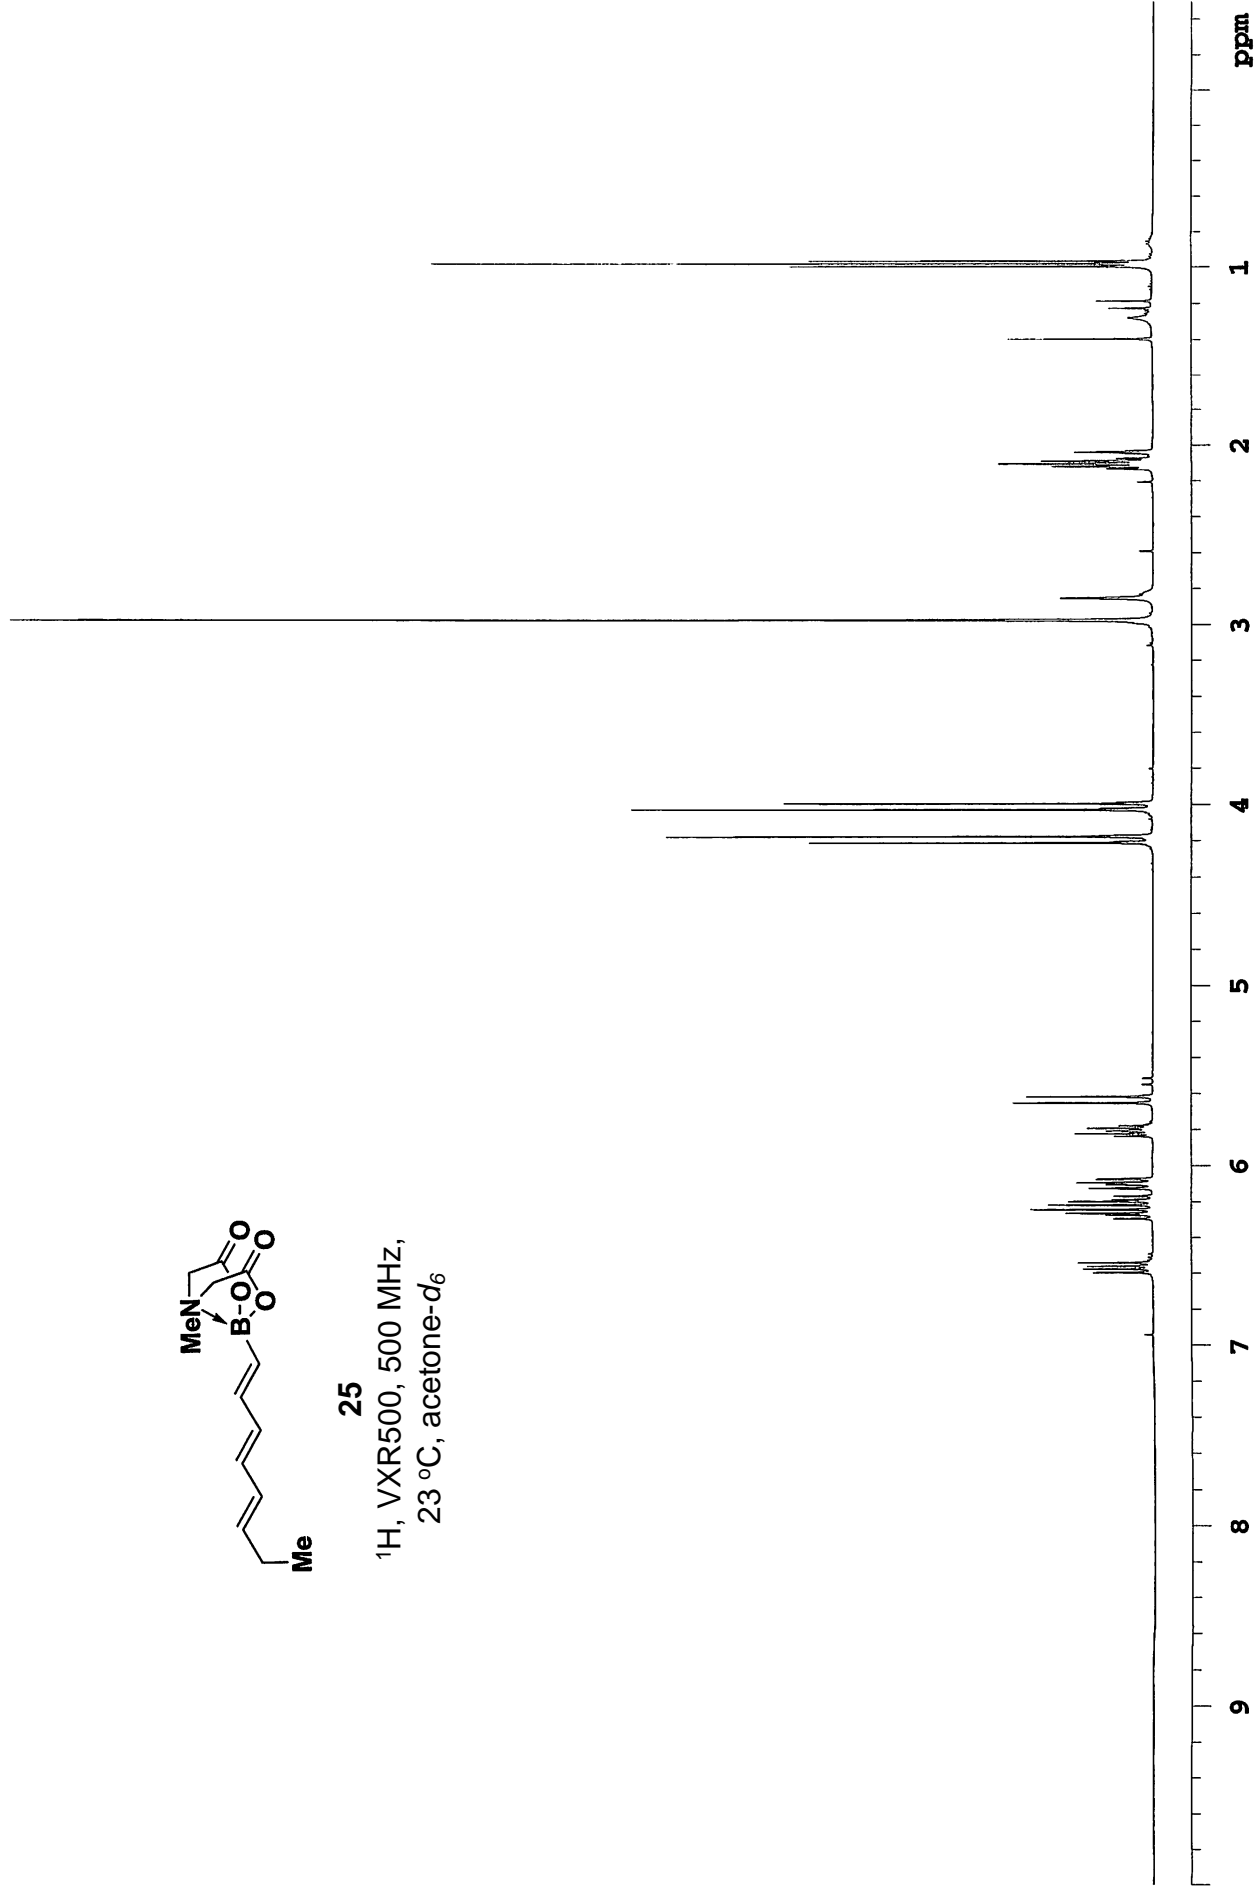

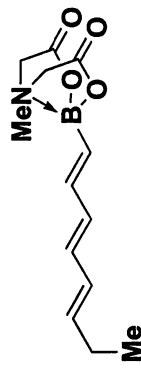

**25**

$^{13}\text{C}$ , VXR500, 125 MHz,  
23 °C, acetone- $d_6$

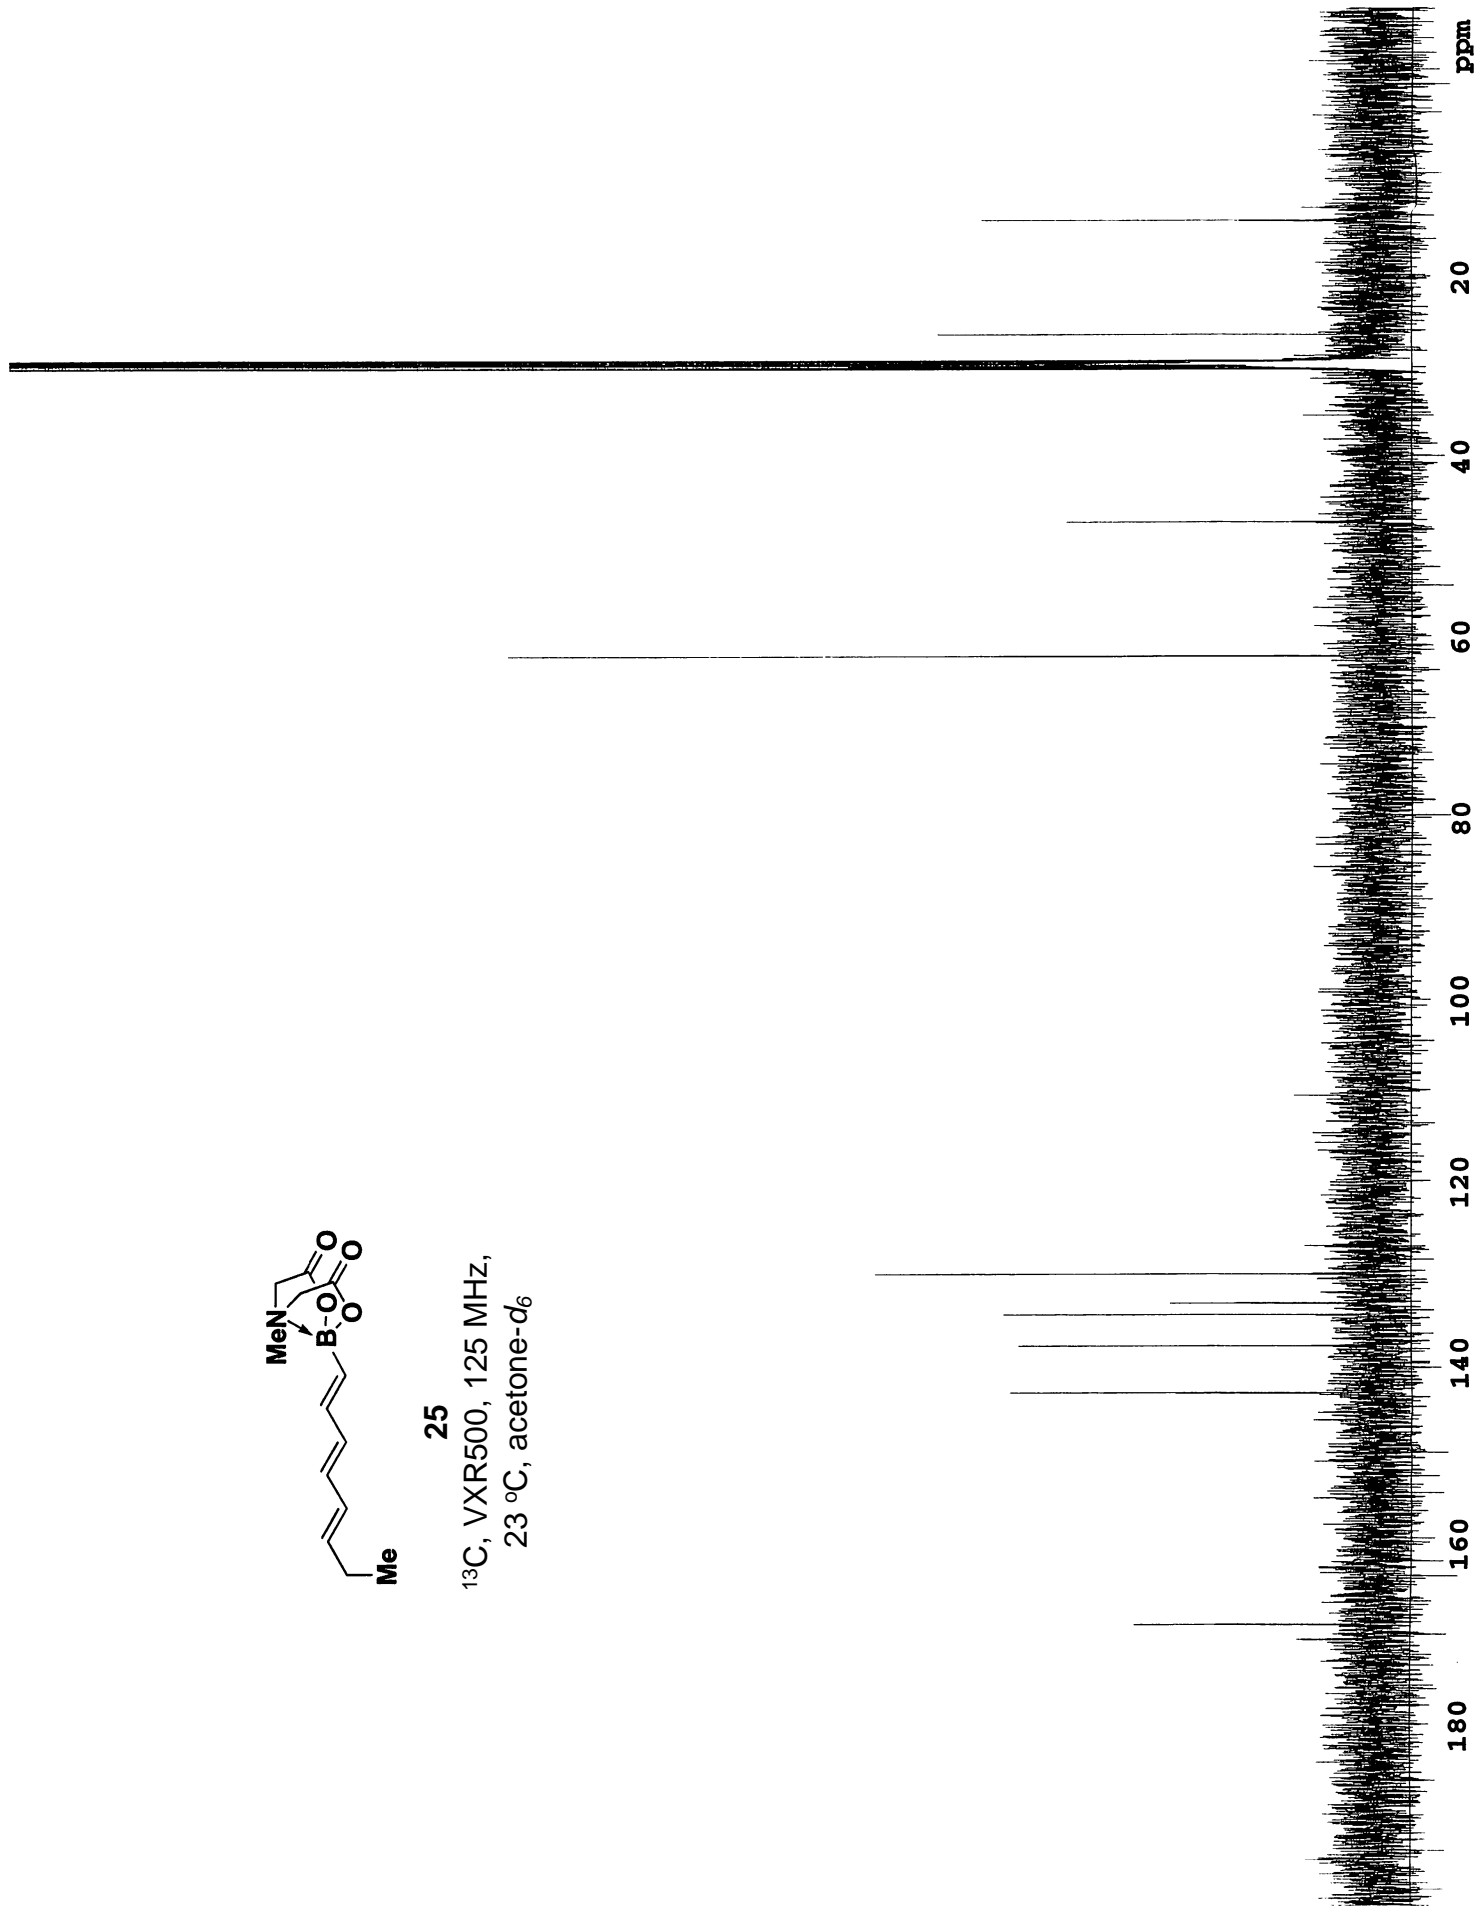



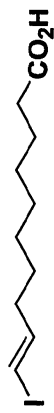

26

<sup>1</sup>H, U400, 400 MHz,  
23 °C, CDCl<sub>3</sub>

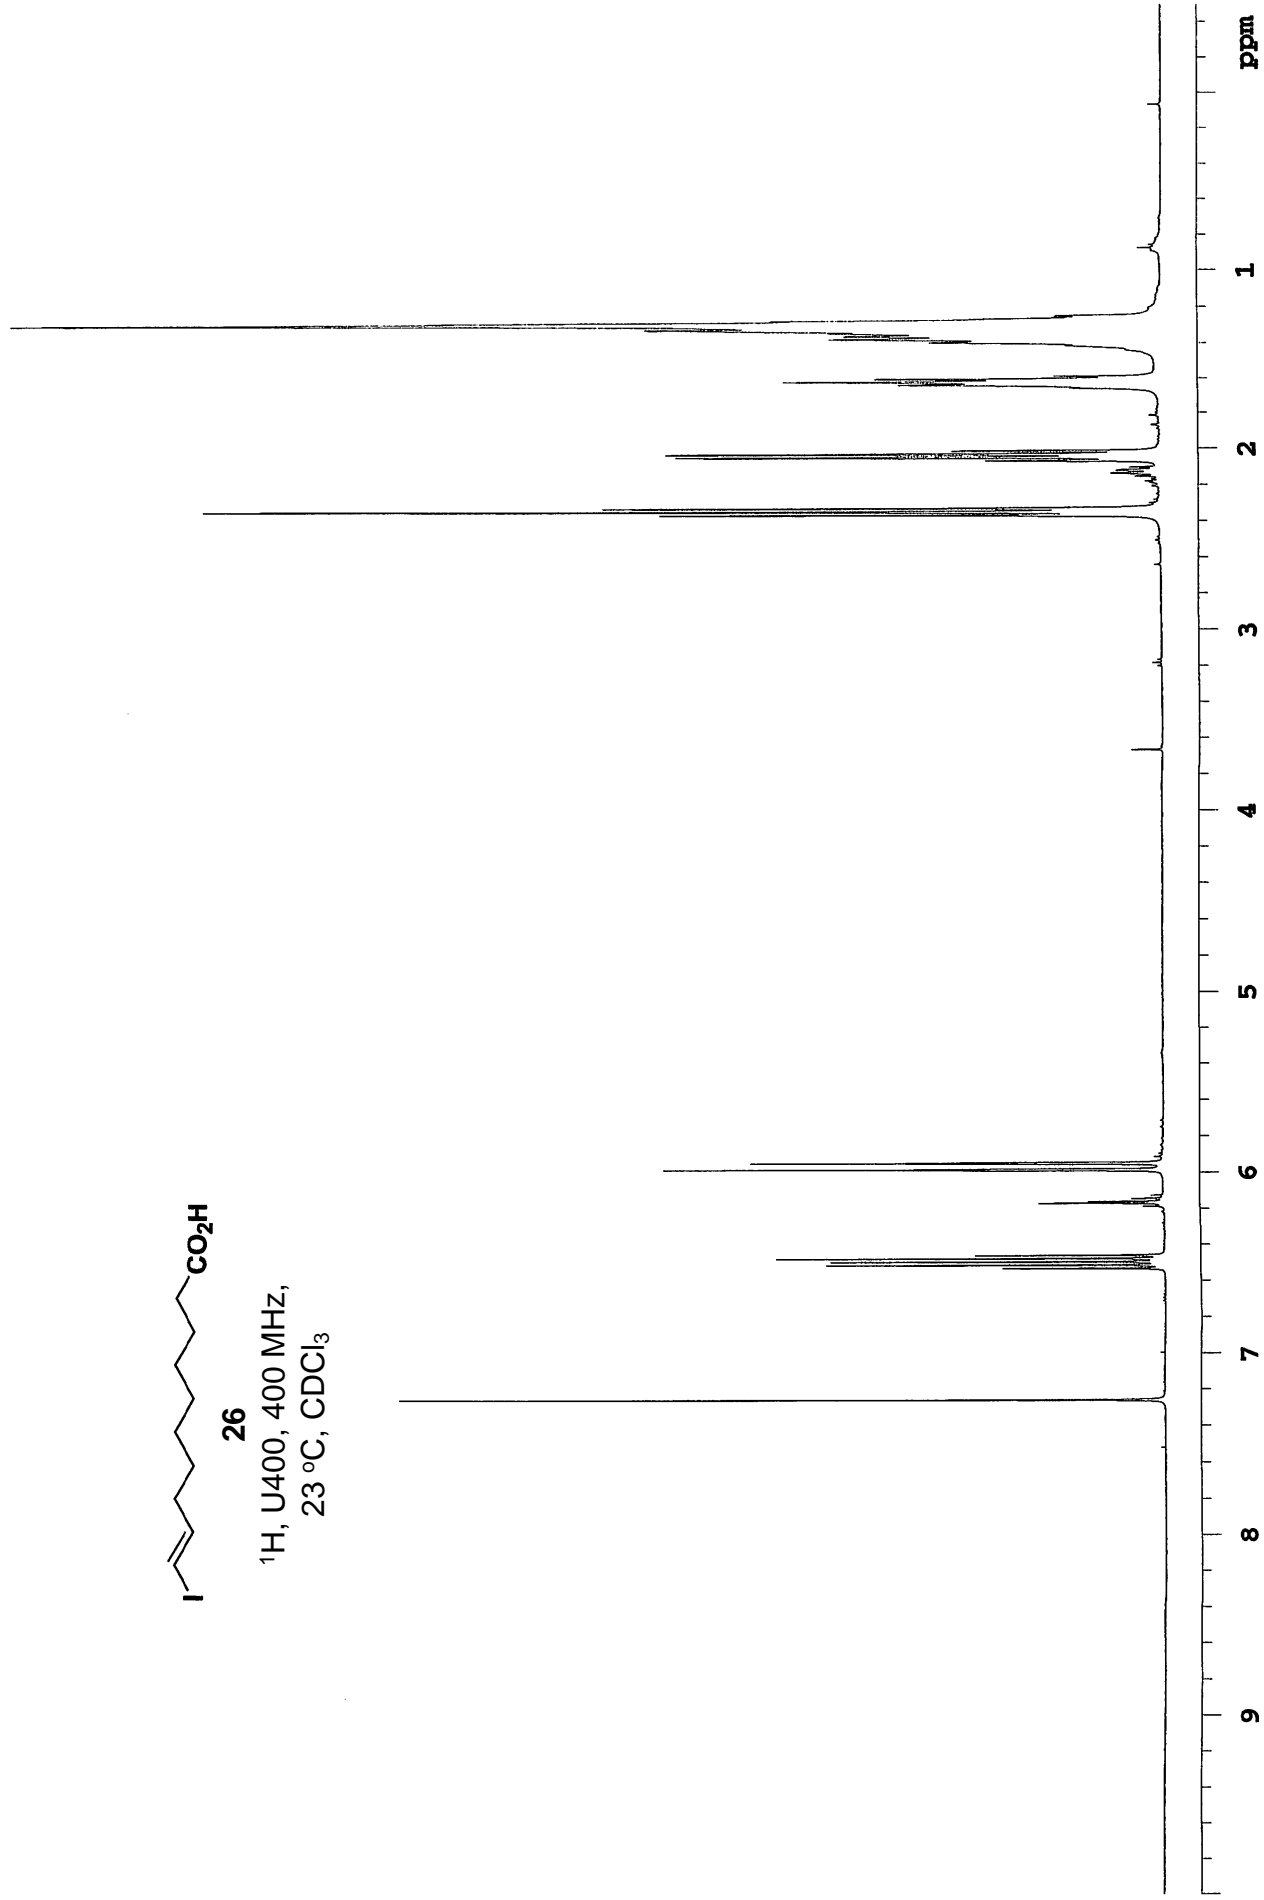

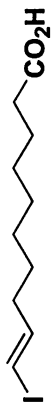

**26**

$^{13}\text{C}$ , U400, 100 MHz,  
23 °C,  $\text{CDCl}_3$

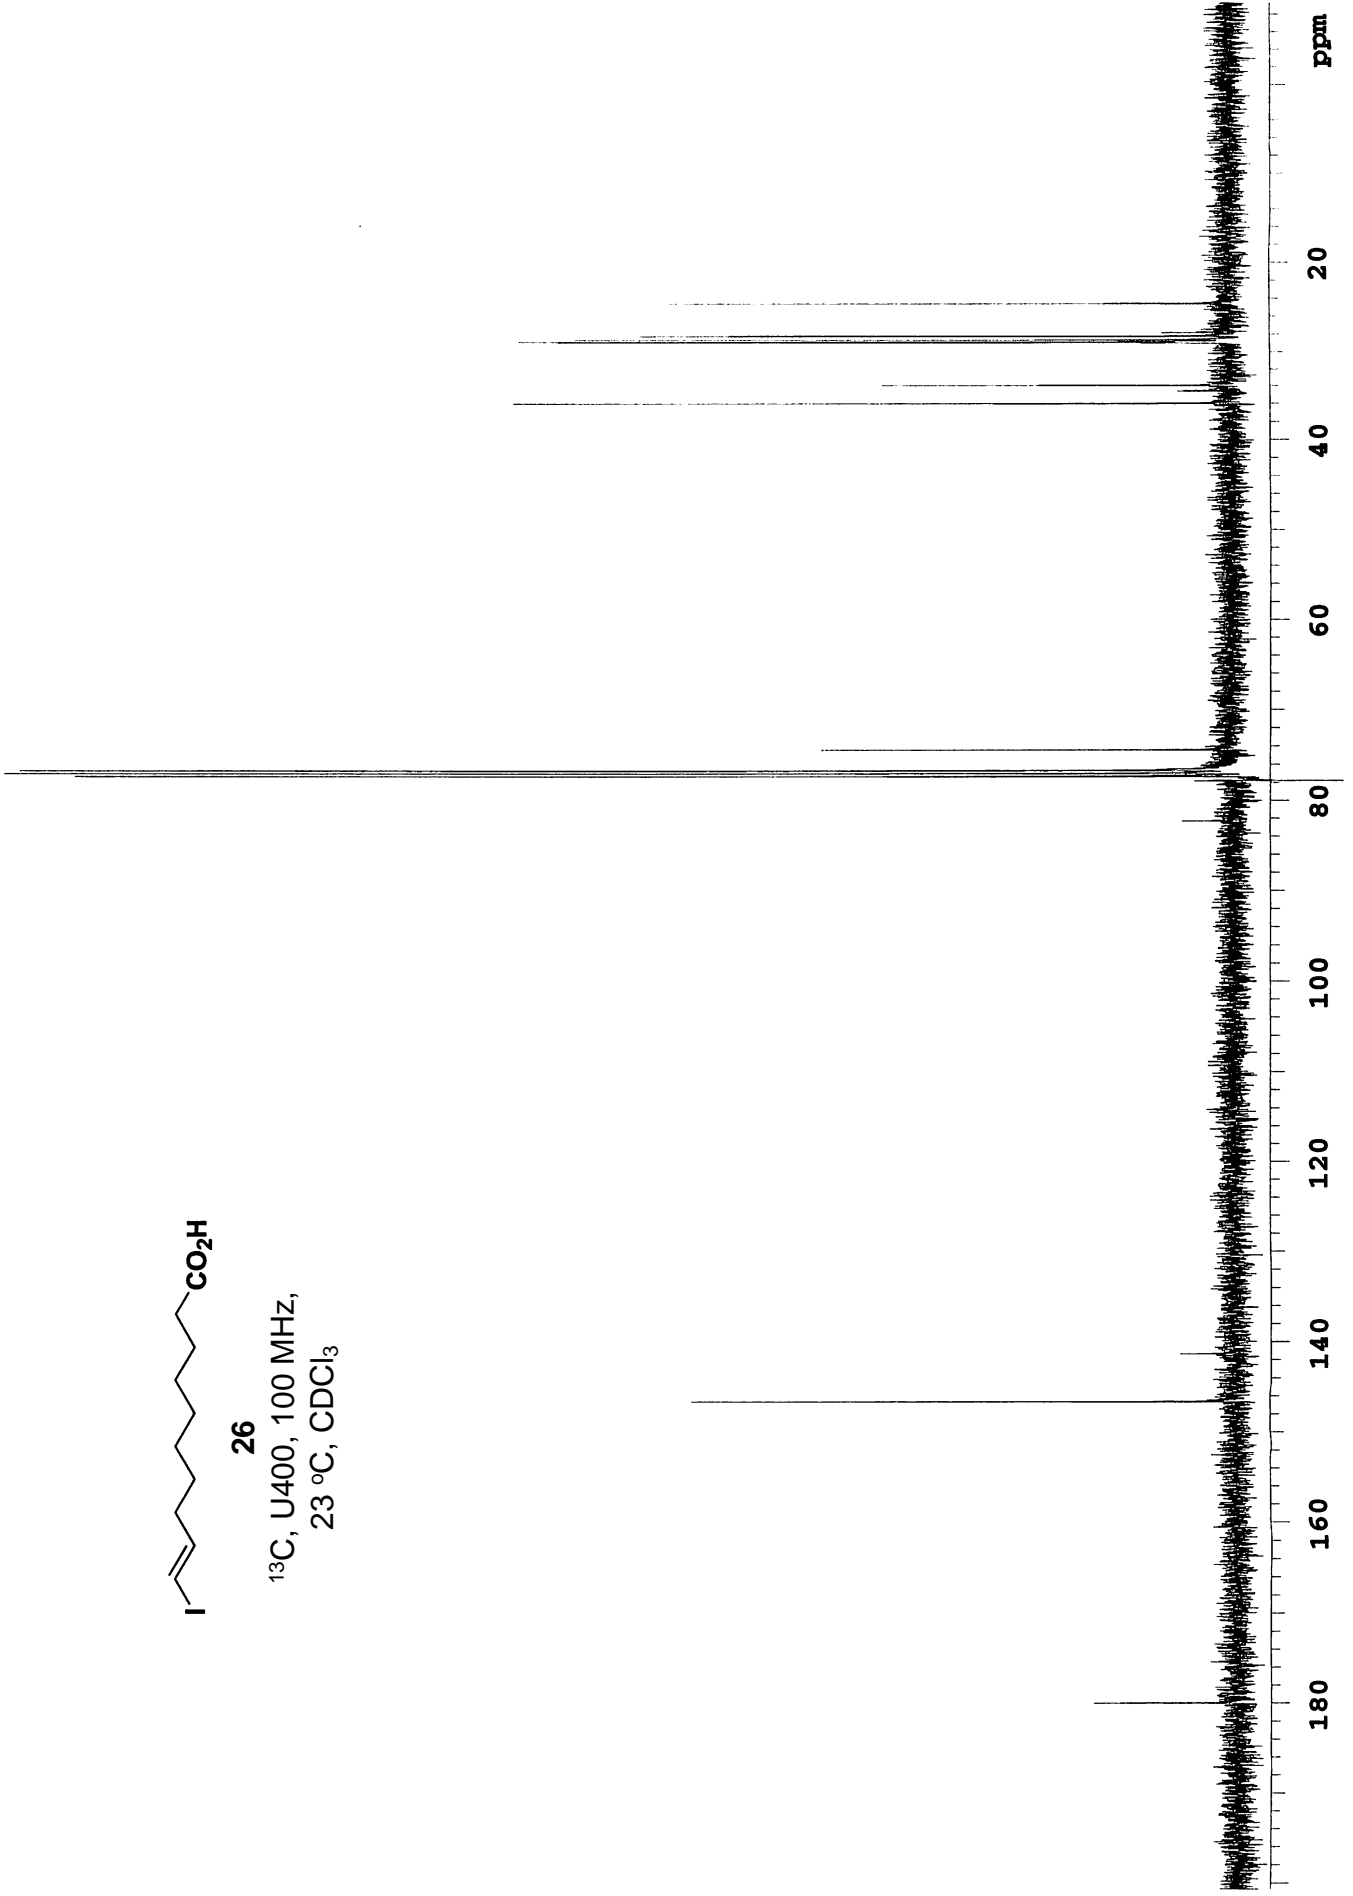

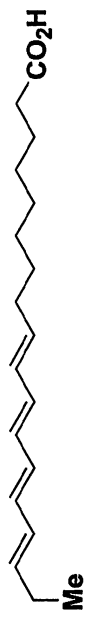

27

<sup>1</sup>H, VXR500, 500 MHz,  
23 °C, CDCl<sub>3</sub>

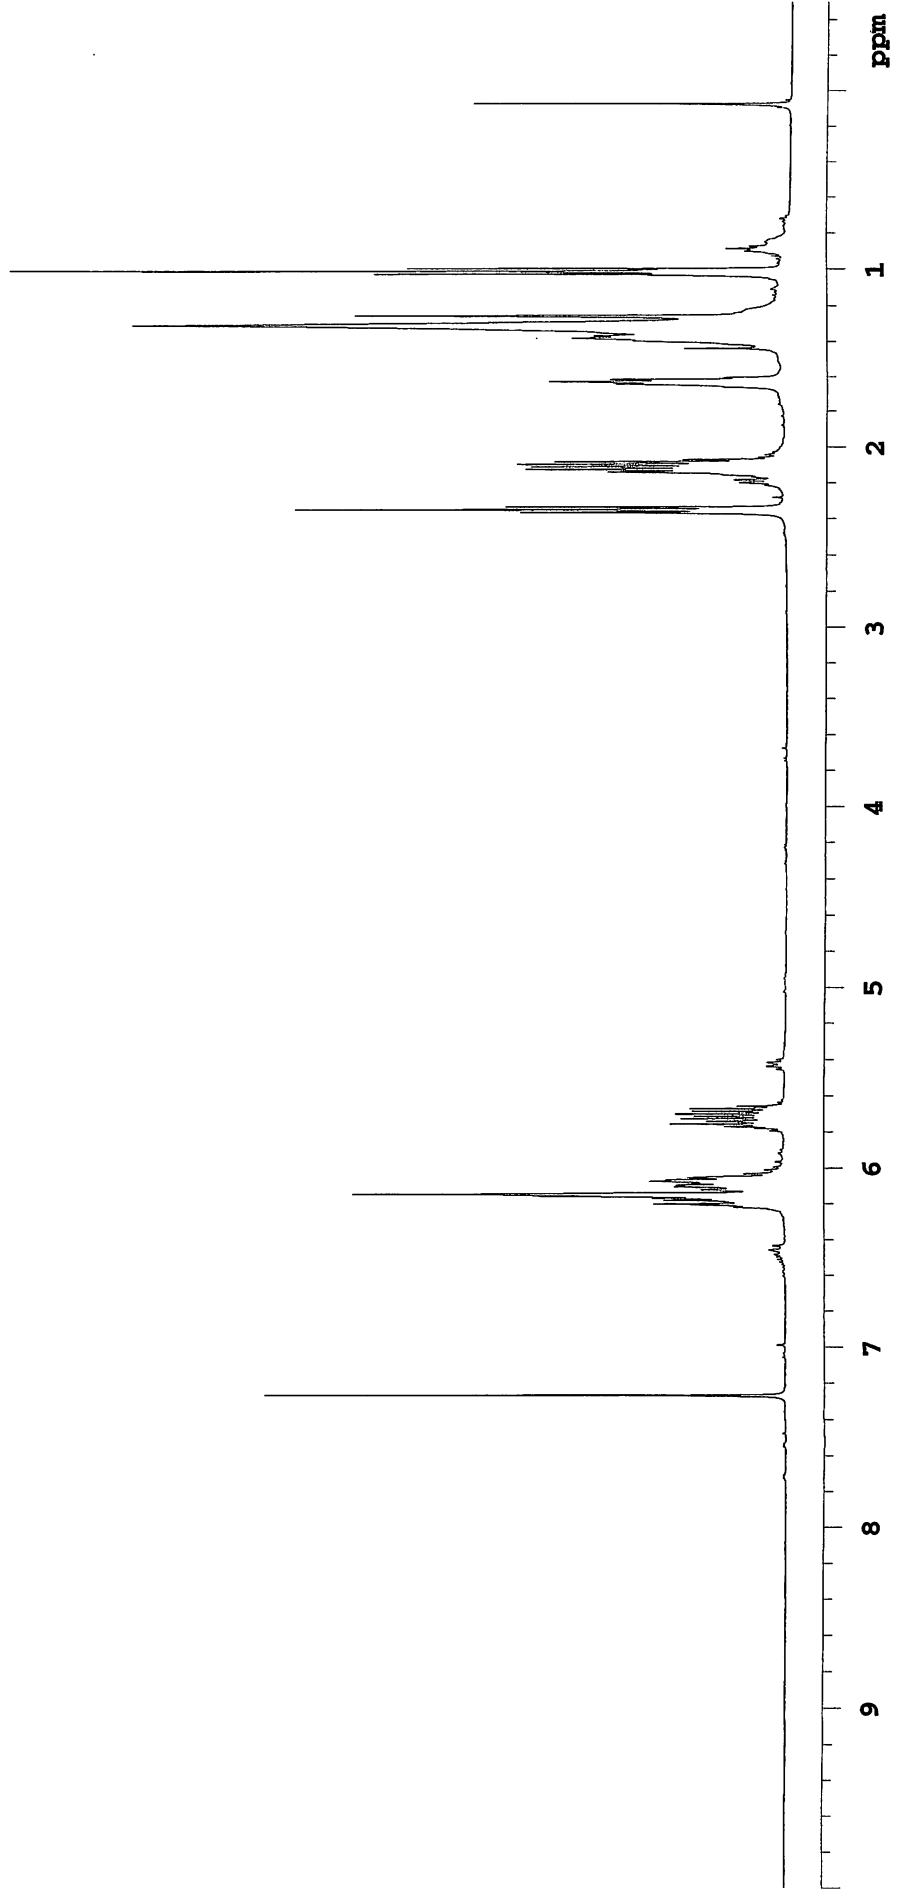

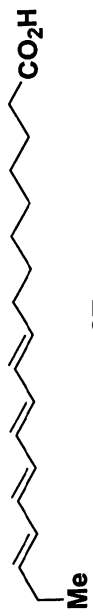

**27**

<sup>13</sup>C, VXR500, 125 MHz,  
23 °C, CDCl<sub>3</sub>

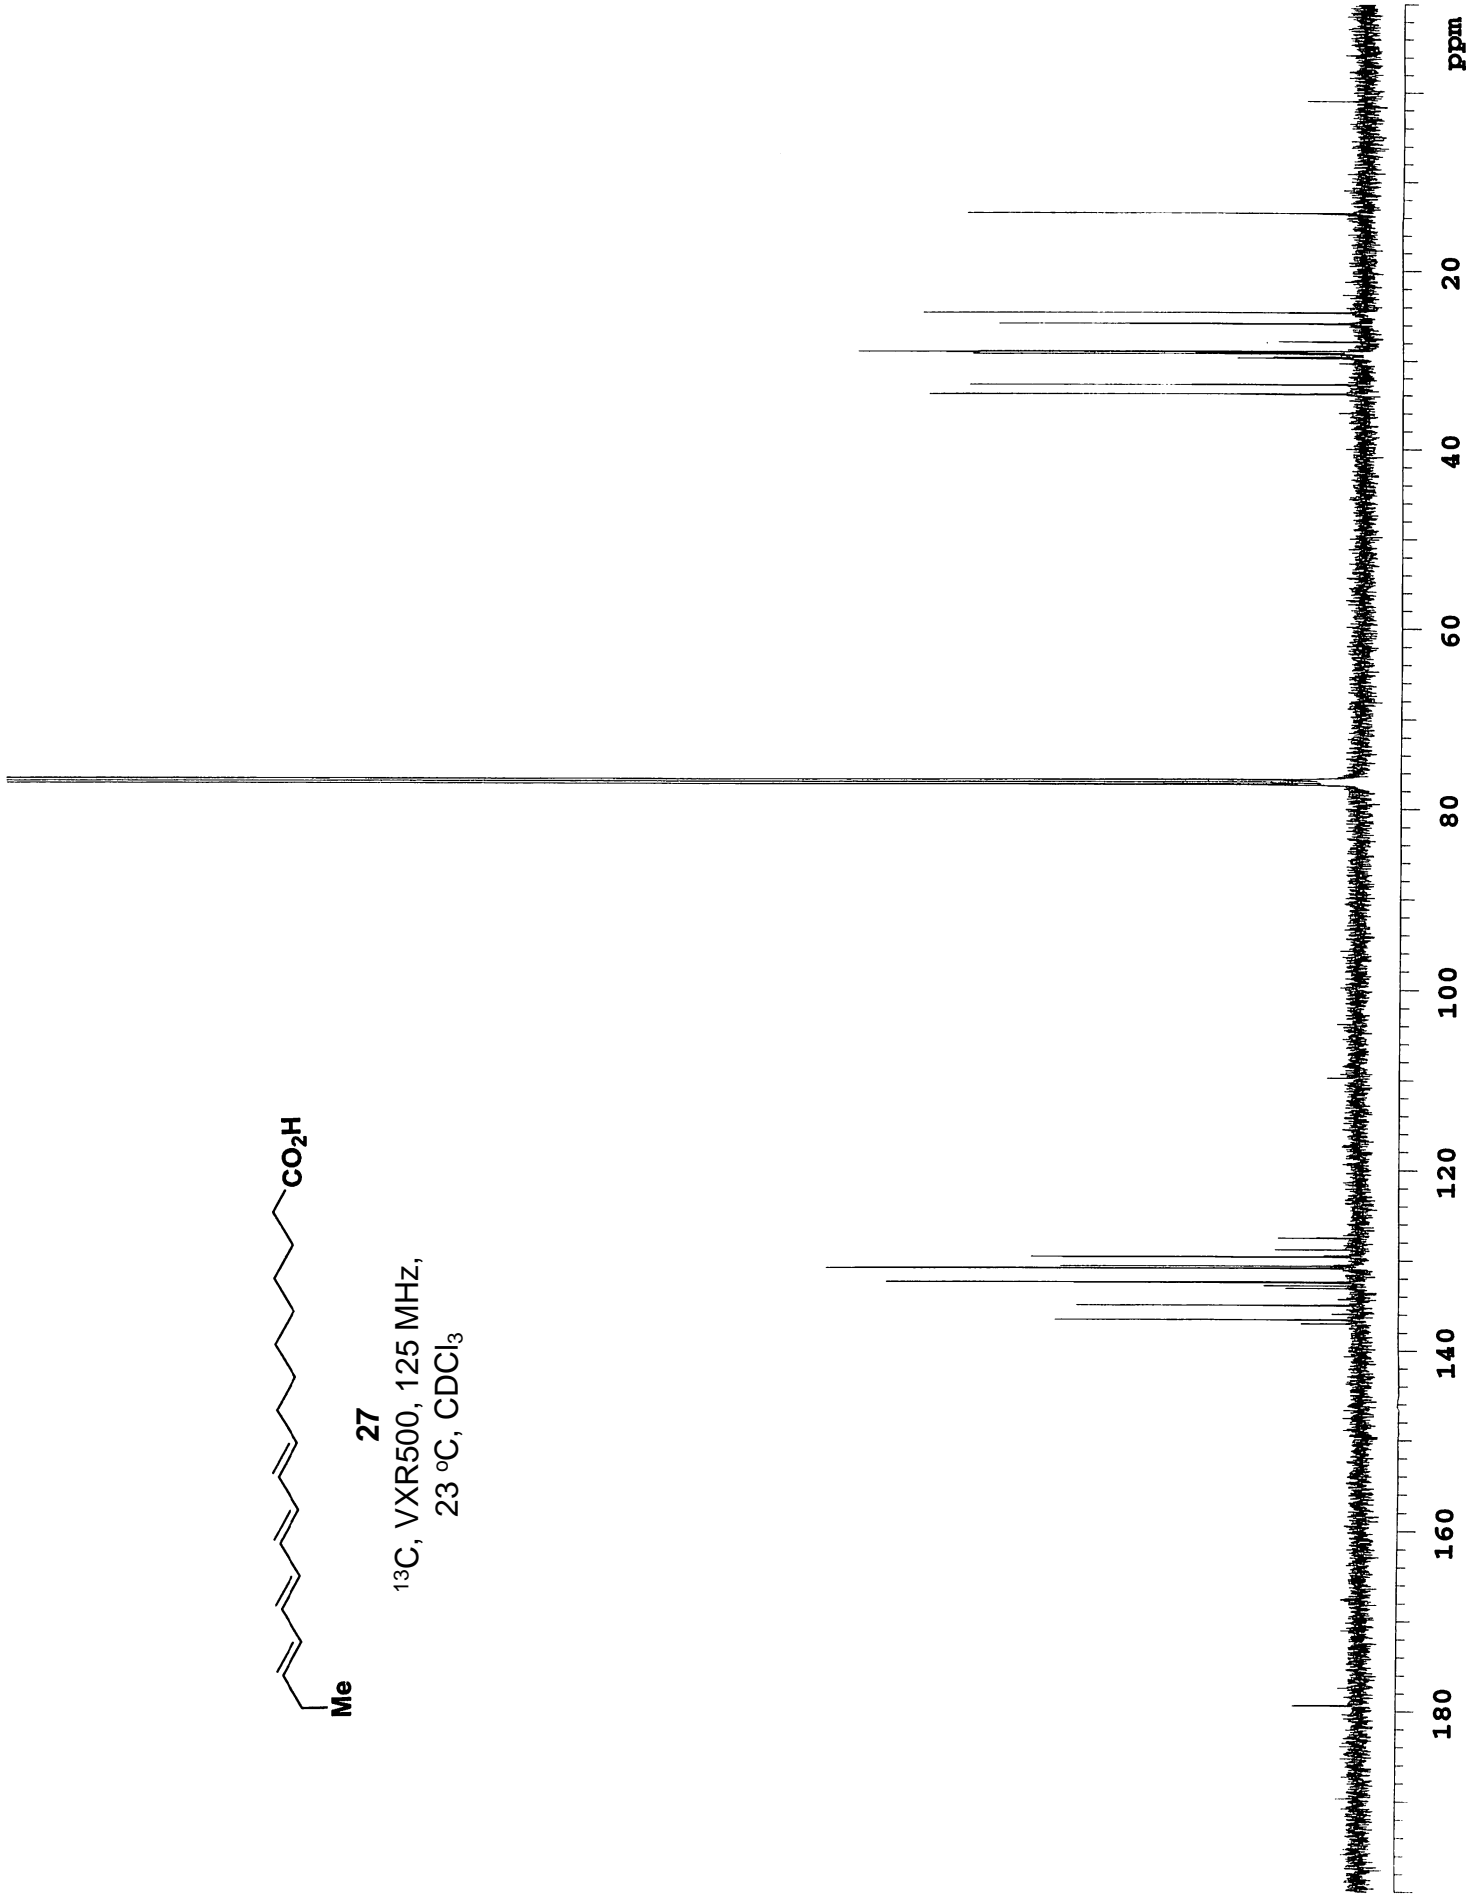

LSJI-20

exp1 s2pul

```

SAMPLE          DEC. & VT
date  May 22 2007  dfrq  499.699
solvent  CDC13  dn      H1
file     exp  dpwr  20
ACQUISITION  dof      0
sfrq      499.699  dm      nnn
tn         H1  dnm      c
at         4.665  dmf      200
xp         65536  dseq
sw         7024.9  dres      1.0
fb         4000  homo      n
bs         4      PROCESSING
tpwr      63  lb      not used
pw        6.5  wtfile
dl         0  proc      ft
tof        2.0  fn      not used
nt         16  math      f
ct         16
alock      n  weir
gain      not used  wexp  svf(ml)
FLAGS      wbs
il         n  wnt      wft('acq')
in         n
dp         y
hs         nn
DISPLAY
sp        -250.7
vp        5693.8
vs         115
sc         0
wc         250
hzmm      22.78
is        1494.45
rf1       4641.6
rfp       3617.8
th         7
ims       3.000
ai        ph

```

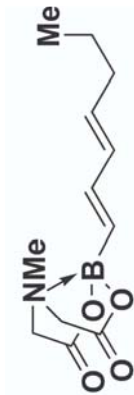

28

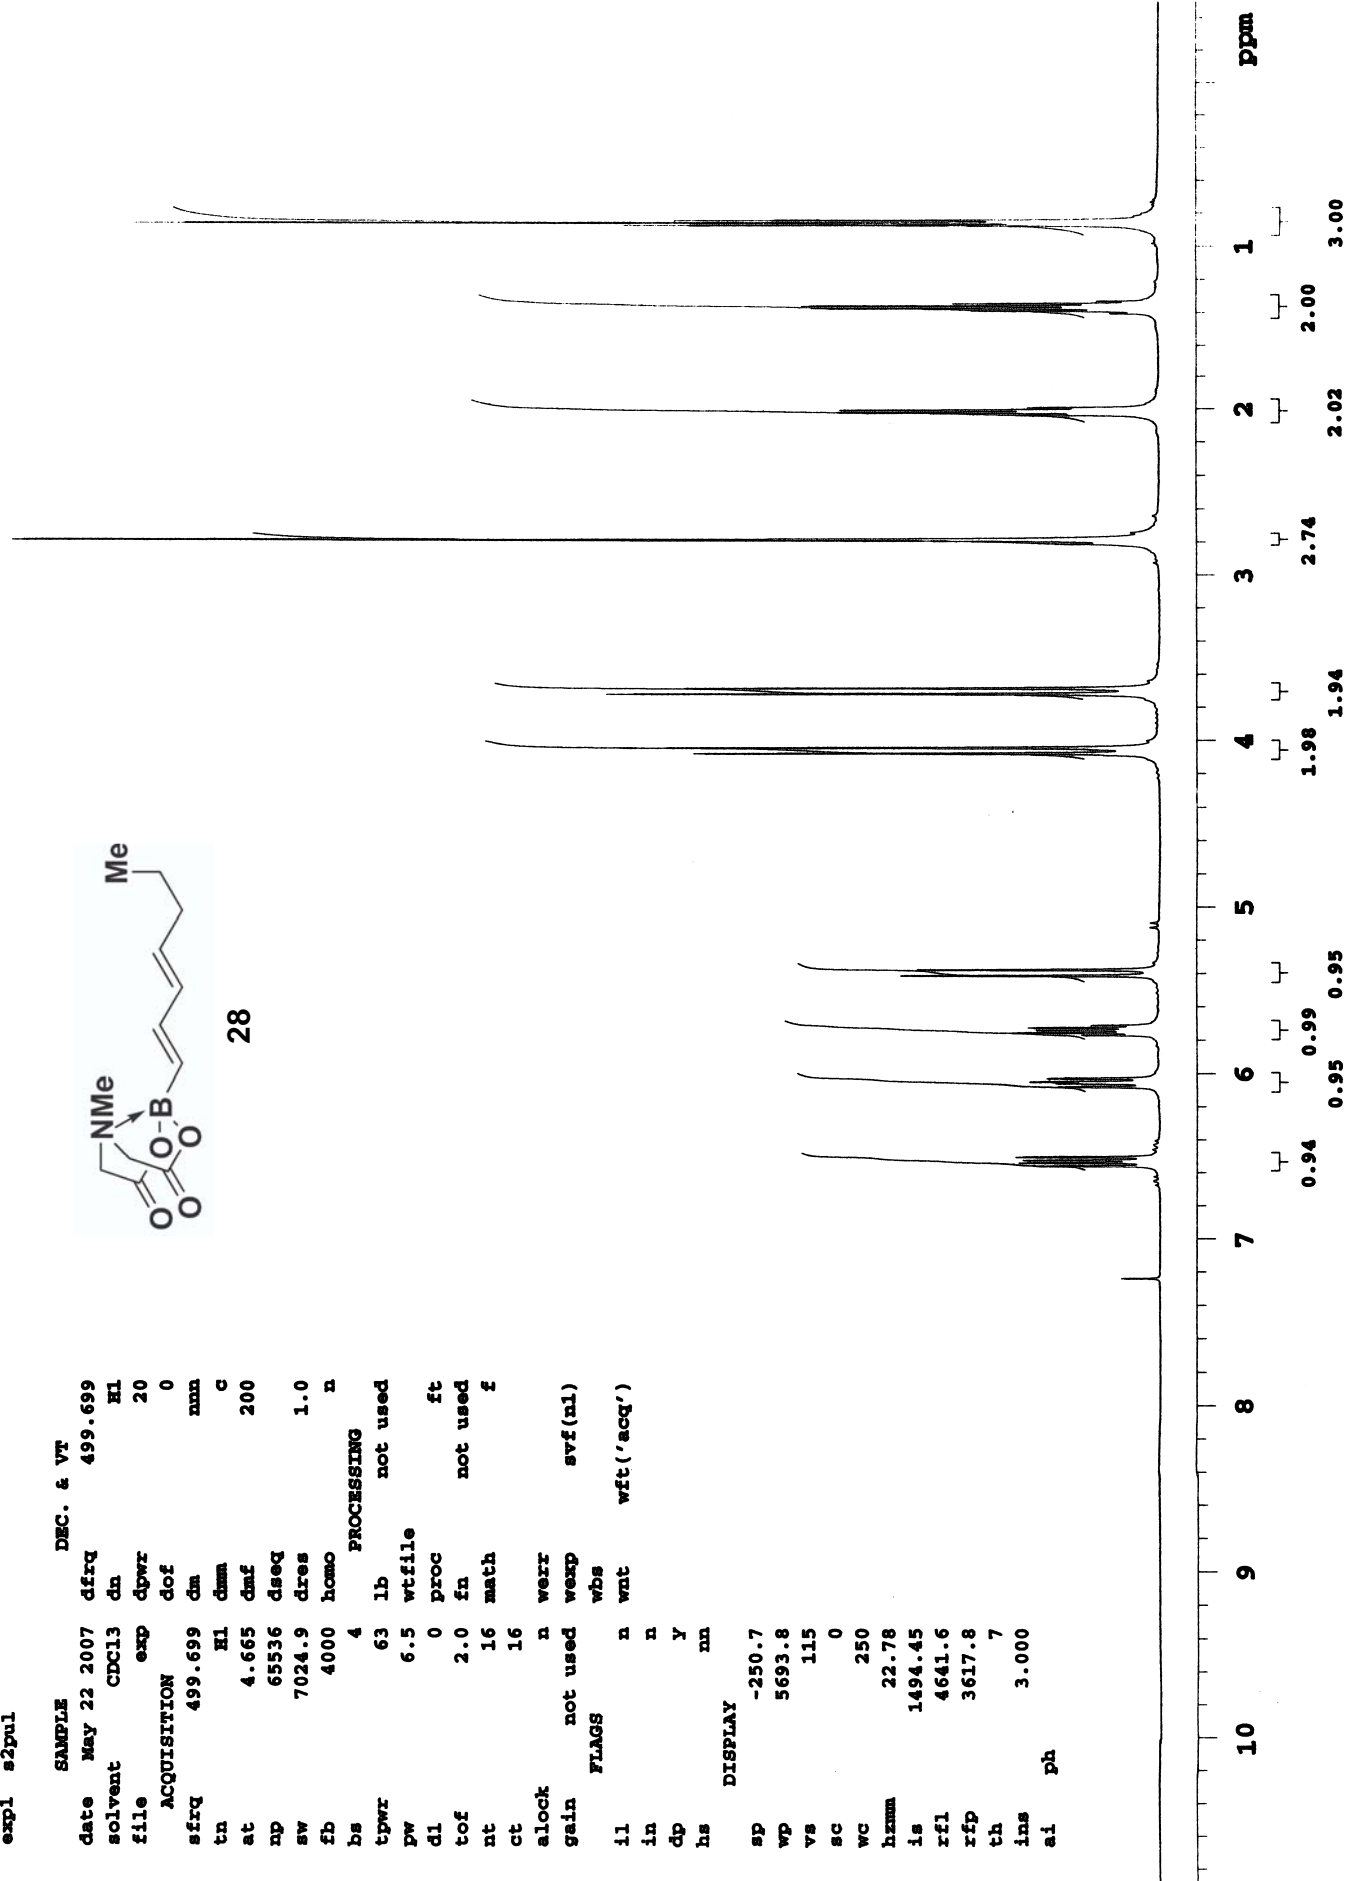

10 9 8 7 6 5 4 3 2 1 ppm

0.94 0.95 0.95 1.94 1.98 2.02 2.74 2.00 3.00

LSJI-20-13C

exp1 s2pul

|             |             |            |          |
|-------------|-------------|------------|----------|
| SAMPLE      |             | DEC. & VT  |          |
| date        | May 22 2007 | dfrq       | 499.698  |
| solvent     | CDCl3       | dn         | H1       |
| file        | exp         | dpwr       | 44       |
| ACQUISITION |             | dof        | -827.6   |
| sfrq        | 125.663     | dm         | yyy      |
| tn          | C13         | dmm        | w        |
| at          | 1.086       | dmf        | 12000    |
| np          | 65536       | dseq       |          |
| sw          | 30165.9     | dres       | 90.0     |
| fb          | 16600       | homo       | n        |
| bs          | 16          | PROCESSING |          |
| ss          | 1           | lb         | 1.00     |
| tpwr        | 53          | wtfile     |          |
| pw          | 6.0         | proc       | ft       |
| dl          | 1.000       | fn         | not used |
| tof         | 1884.7      | math       | f        |
| nt          | 2000        |            |          |
| ct          | 1553        | weir       |          |
| alock       | n           | wexp       |          |
| gain        | not used    | wbs        |          |
| FLAGS       |             | wnt        |          |
| il          | n           |            |          |
| in          | n           |            |          |
| dp          | y           |            |          |
| hs          | nn          |            |          |
| DISPLAY     |             |            |          |
| sp          | 627.1       |            |          |
| wp          | 28239.1     |            |          |
| vs          | 140         |            |          |
| sc          | 0           |            |          |
| wc          | 250         |            |          |
| hzmm        | 112.96      |            |          |
| is          | 500.00      |            |          |
| rfl         | 10973.8     |            |          |
| rfp         | 9675.0      |            |          |
| th          | 159         |            |          |
| ins         | 100.000     |            |          |
| nm          | ph          |            |          |

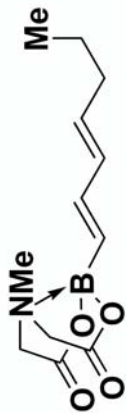

28

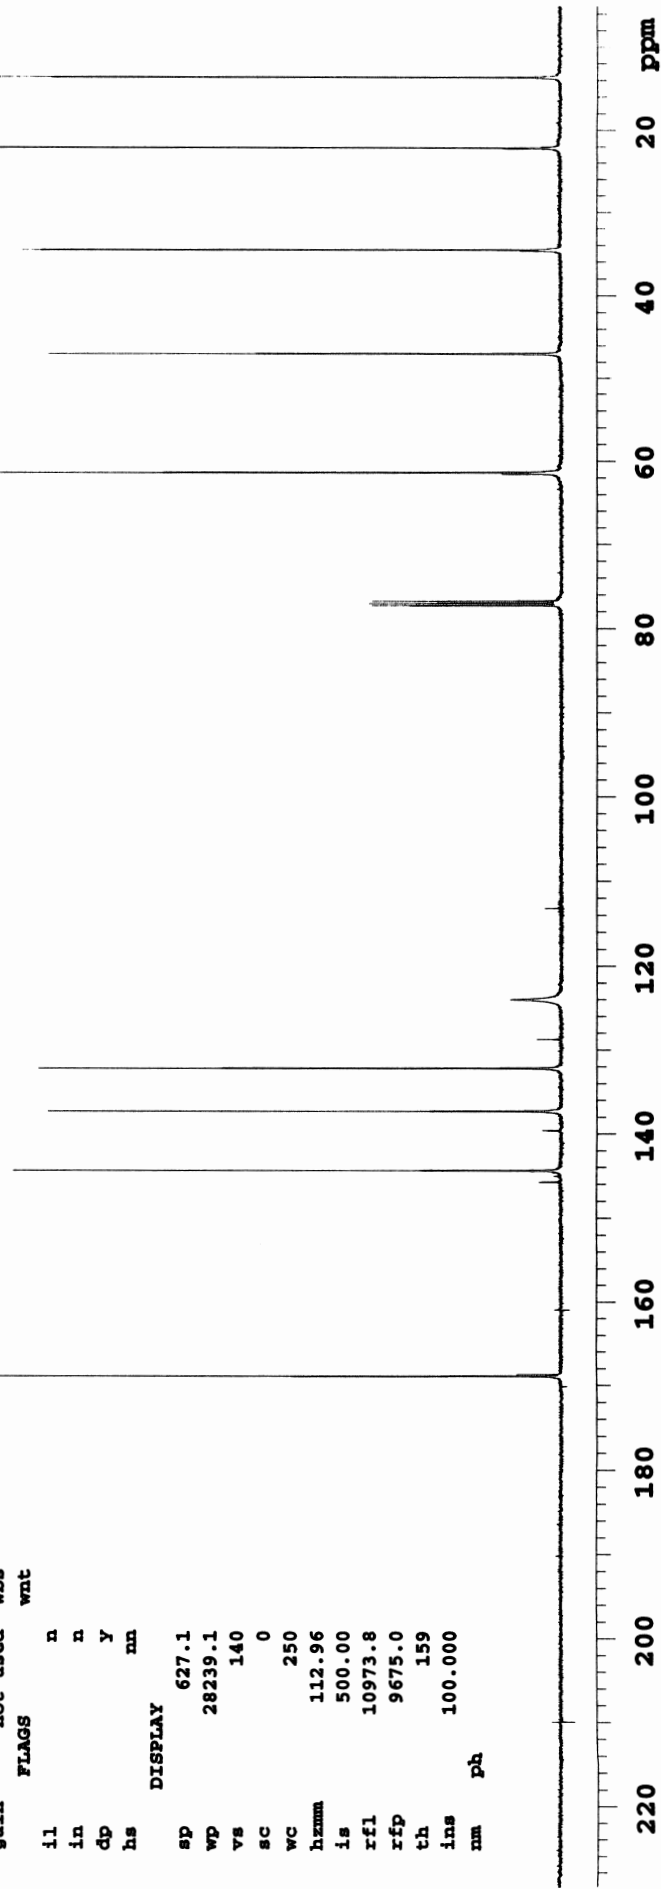

LSJII-15

expl stdlh

|         |             |            |            |
|---------|-------------|------------|------------|
| date    | Oct 15 2007 | dn         | H1         |
| solvent | CD3CN       | dof        | 0          |
| file    | exp         | dm         | nnn        |
|         |             | dmm        | c          |
| sfrq    | 399.953     | dmf        | 200        |
| tn      | H1          | dpwr       | 20         |
| at      | 4.096       | PROCESSING |            |
| np      | 65536       | lb         | not used   |
| sw      | 8000.0      | wtfile     |            |
| fb      | 4400        | proc       | ft         |
| bs      | 16          | fn         | not used   |
| tpwr    | 63          | math       | f          |
| pw      | 5.8         |            |            |
| d1      | 0           | werr       |            |
| tof     | -425.7      | wexp       | svf(nl)    |
| nt      | 32          | wbs        |            |
| ct      | 32          | wnt        | wft('acq') |
| alock   | n           | DISPLAY    |            |
| gain    | not used    | sp         | 18.7       |
| FLAGS   |             | wp         | 4354.1     |
| il      | n           | vs         | 151        |
| in      | n           | sc         | 0          |
| dp      | y           | wc         | 250        |
| hs      | nn          | hzmm       | 17.42      |
|         |             | is         | 2565.06    |
|         |             | rfl        | 2785.0     |
|         |             | rfp        | 771.9      |
|         |             | th         | 20         |
|         |             | ins        | 1.000      |
|         |             | nm         | ph         |

29

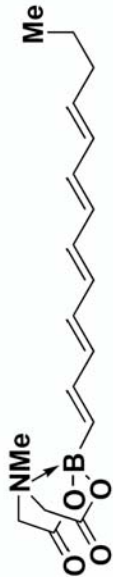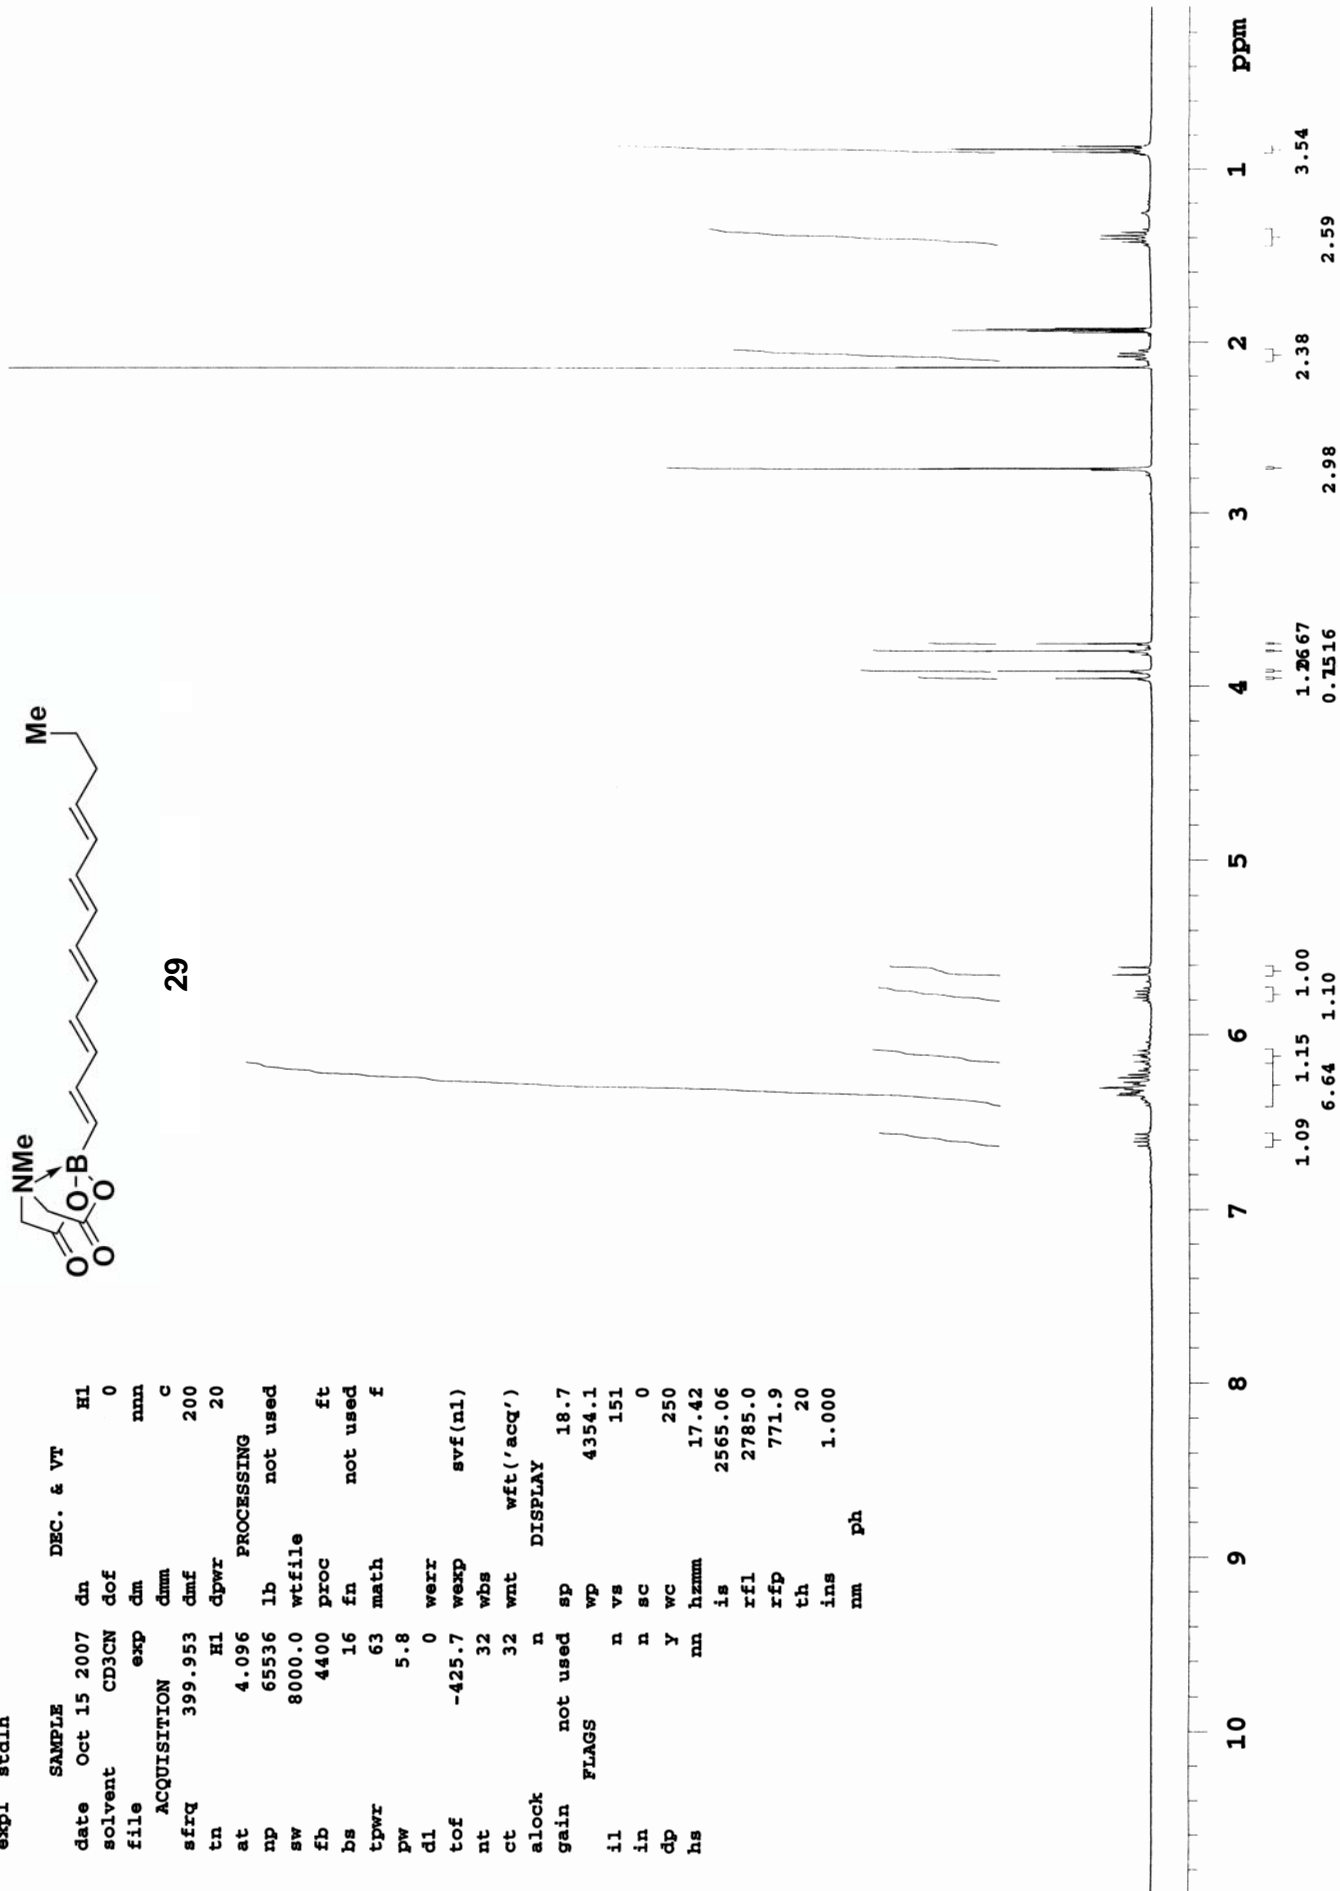

LSJII-15-13C

expl std13c

| SAMPLE           | DEC. & VT          |
|------------------|--------------------|
| date Oct 14 2007 | dn H1              |
| solvent CD3CN    | dof -1092.3        |
| file             | exp dm YYY         |
| ACQUISITION      |                    |
| sfrq 100.579     | dmf 13889          |
| tn               | C13 dpwr 48        |
| at               | 1.311 PROCESSING   |
| np               | 65536 lb 1.00      |
| sw               | 25000.0 wtfile     |
| fb               | 13800 proc ft      |
| bs               | 16 fn not used     |
| tpwr             | 54 math f          |
| pw               | 5.1                |
| dl               | 1.000 werr         |
| tof              | 1966.4 wexp        |
| nt               | 7777 wbs           |
| ct               | 2429 wnt           |
| alock            | n DISPLAY          |
| gain             | not used sp -839.0 |
| FLAGS            | wp 21879.5         |
| il               | n vs 100           |
| in               | n sc 0             |
| dp               | y wc 250           |
| hs               | nn hznm 87.52      |
|                  | is 500.00          |
|                  | rfl 969.7          |
|                  | rfp 130.7          |
|                  | th 2               |
|                  | ins 100.000        |
|                  | nm ph              |

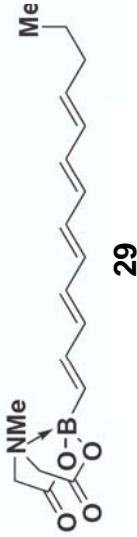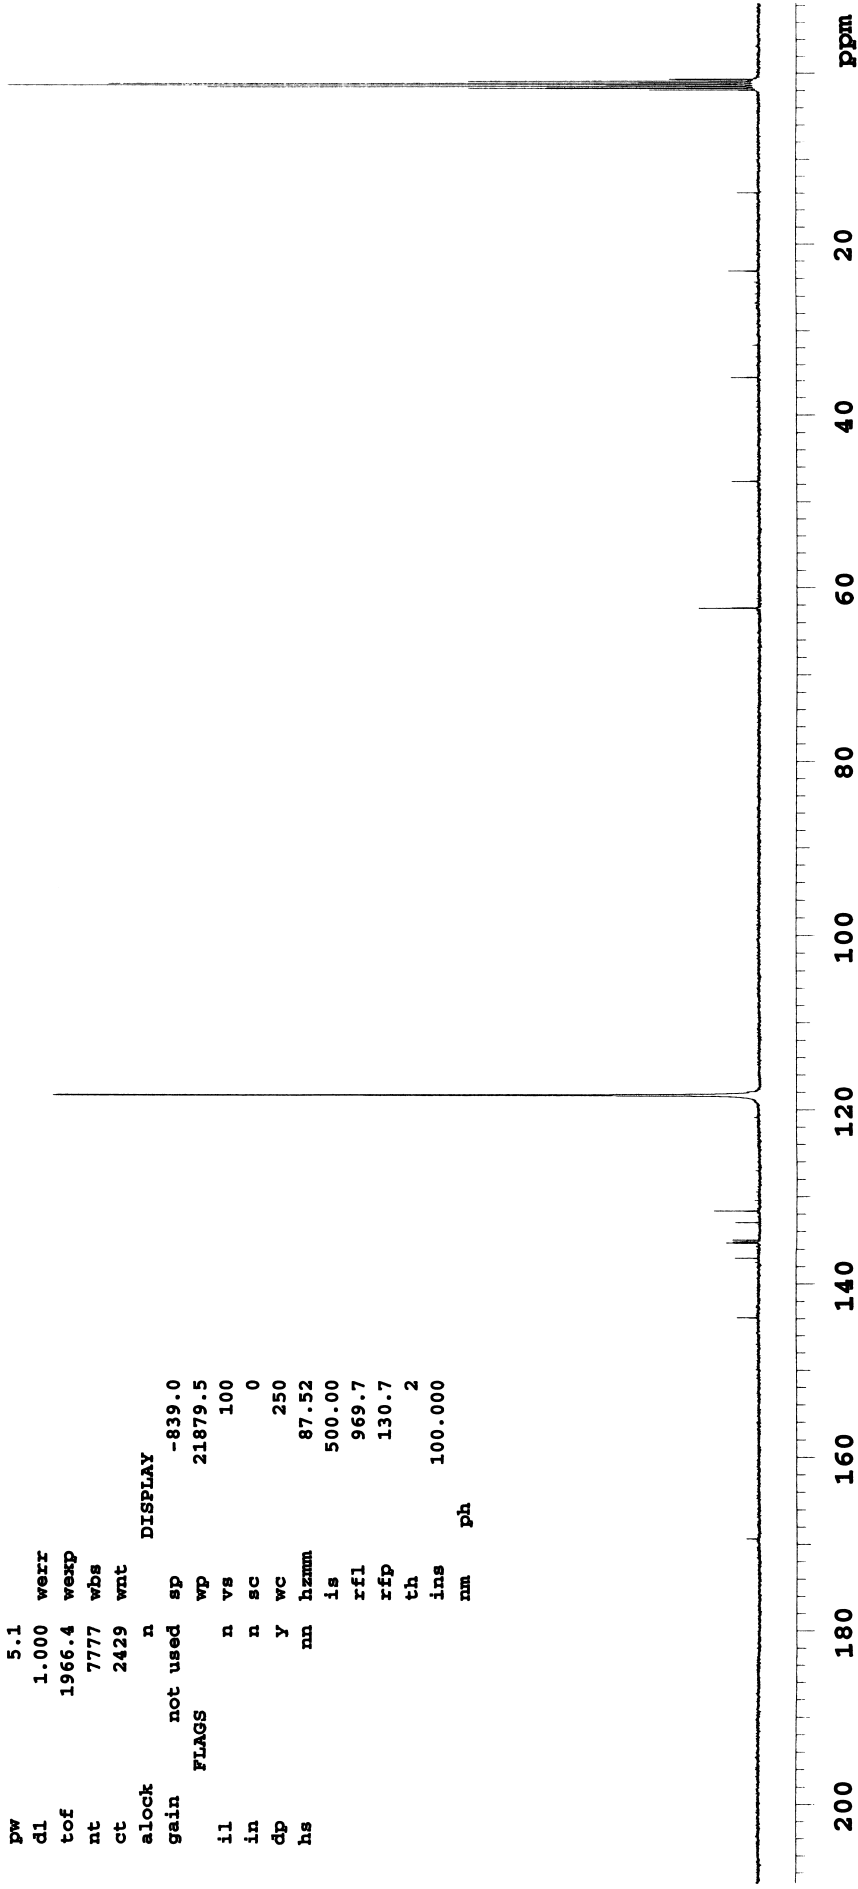



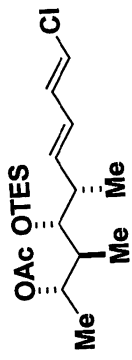

30

$^1\text{H}$ , VXR500, 500 MHz,  
23 °C,  $\text{CDCl}_3$

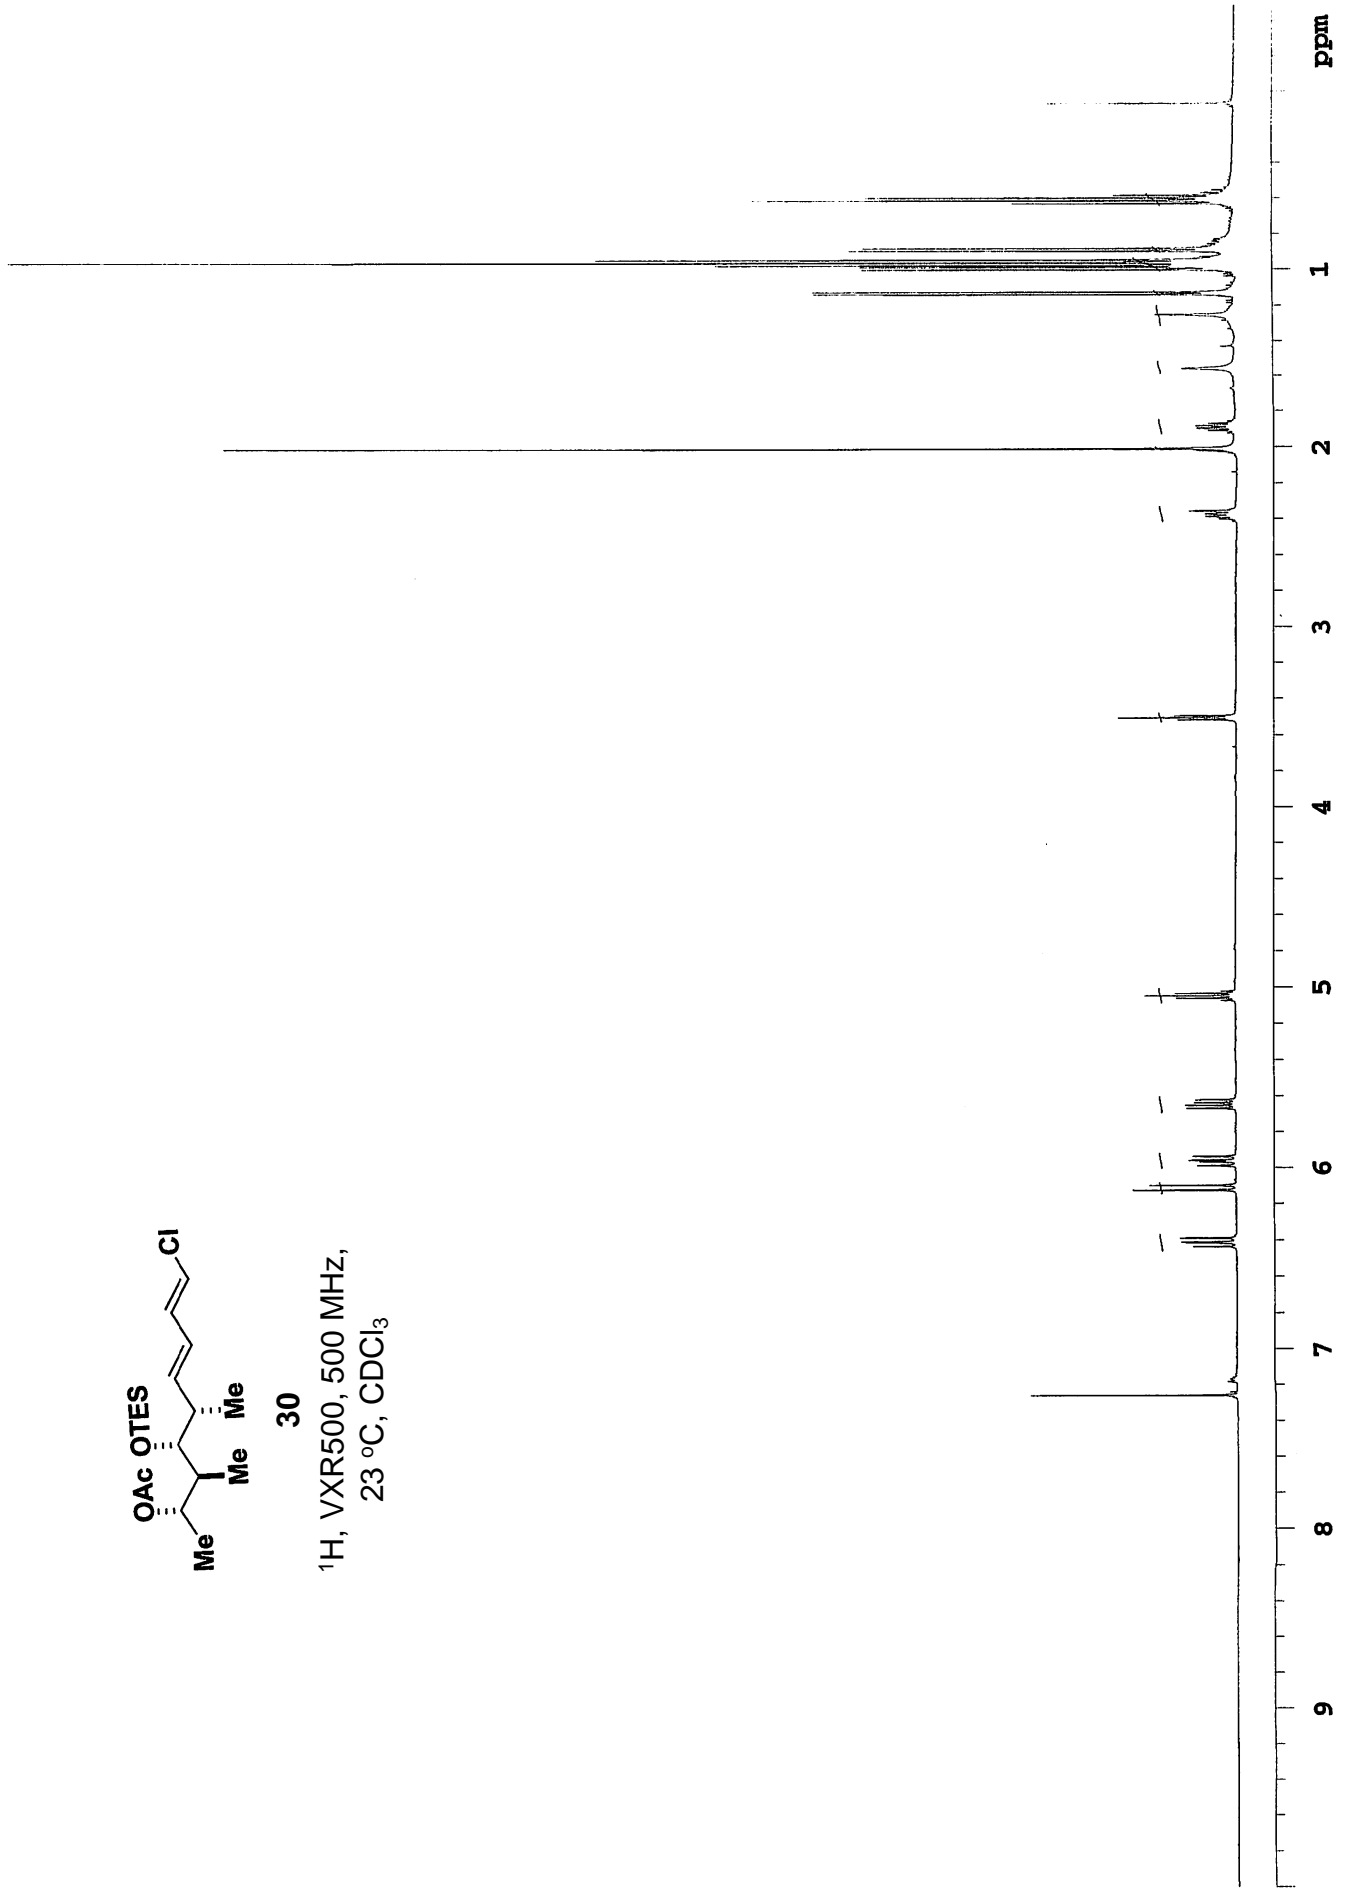

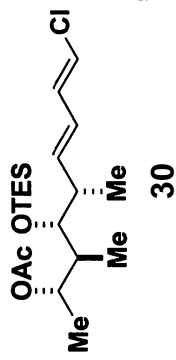

$^{13}\text{C}$ , VXR500, 125 MHz,  
23 °C,  $\text{CDCl}_3$

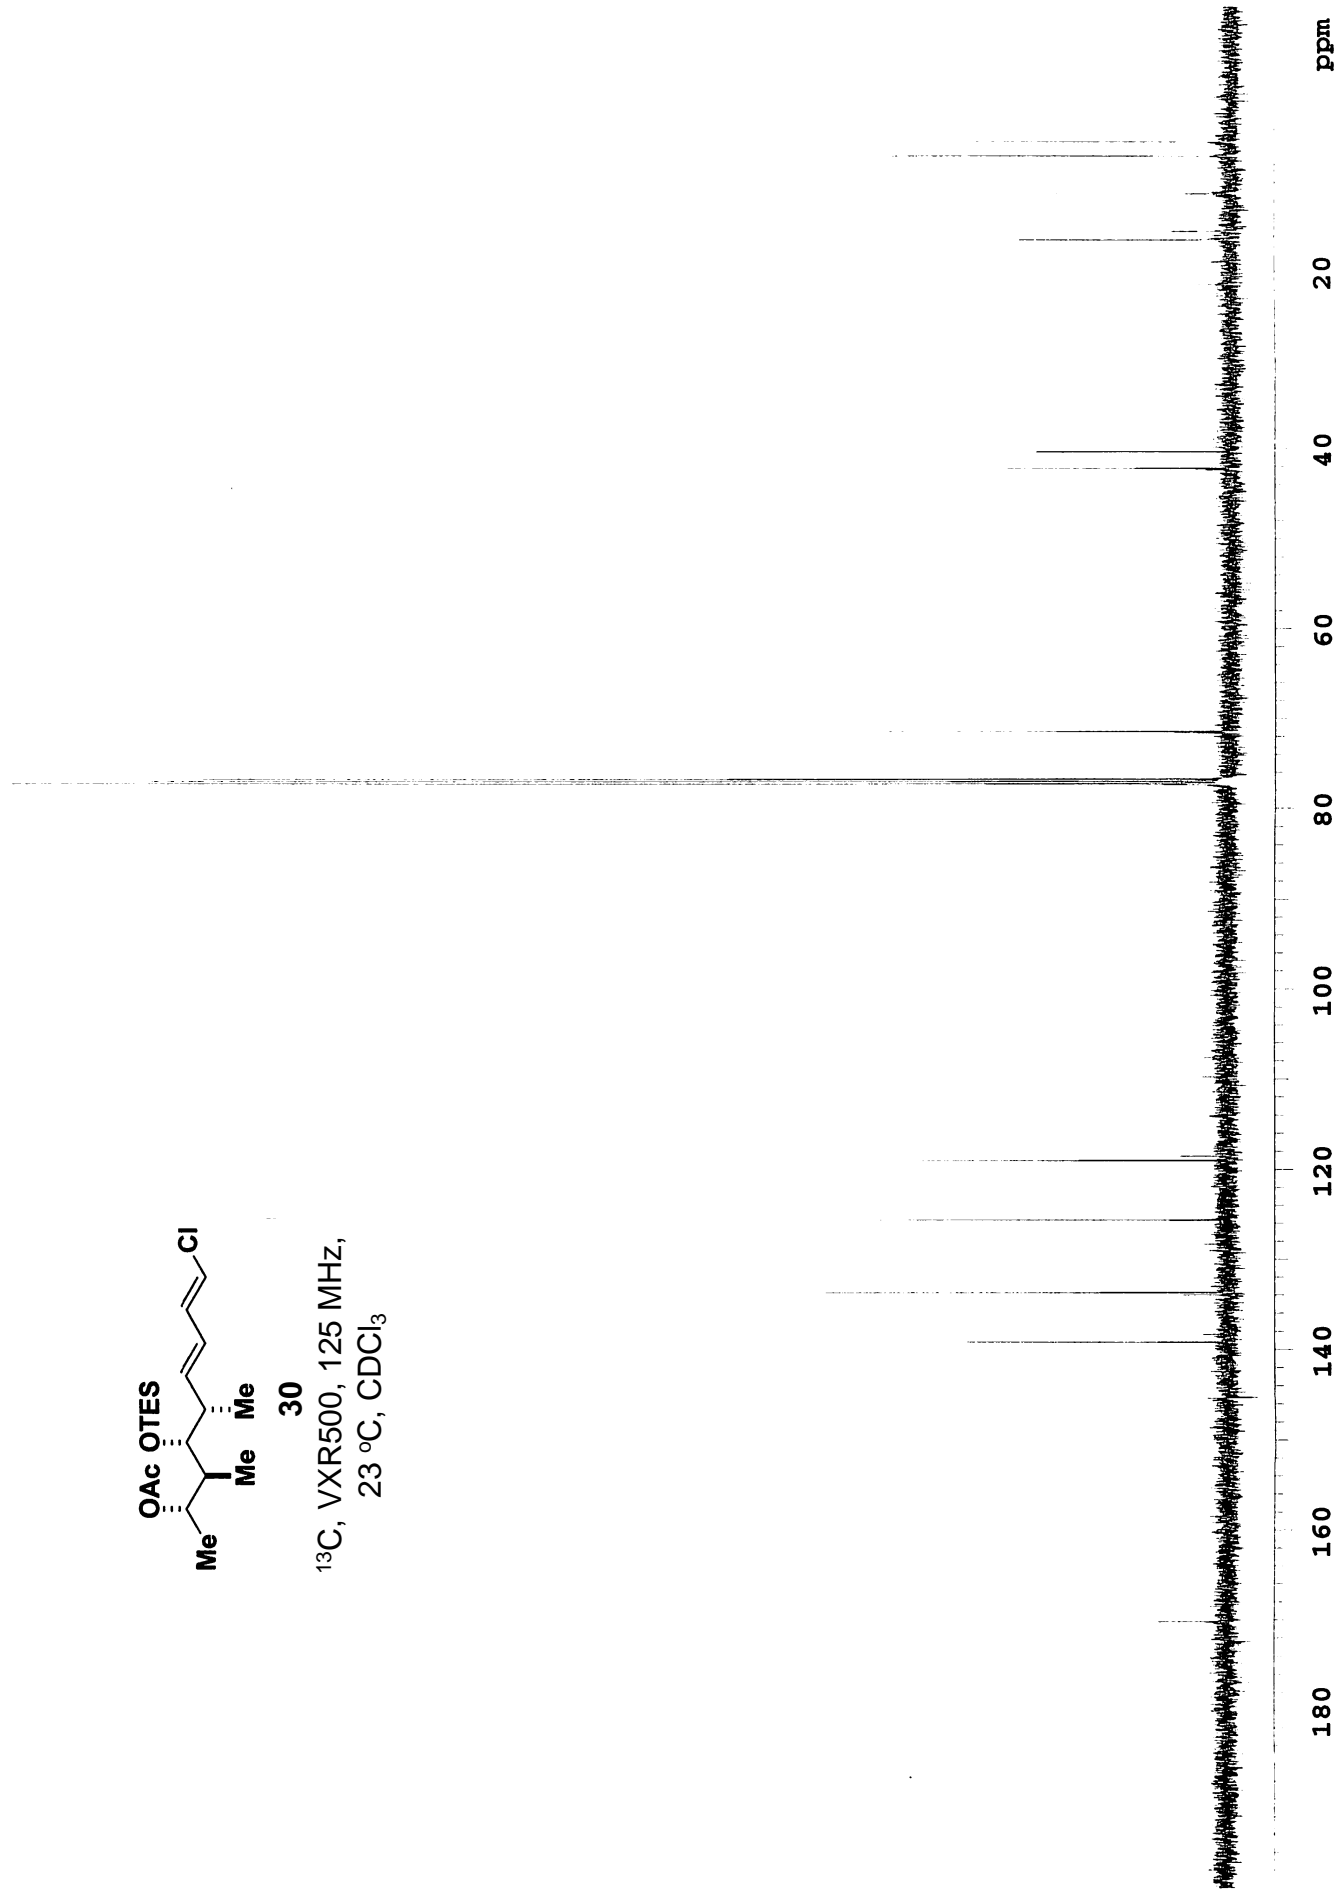





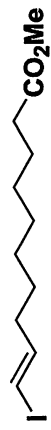

35

$^1\text{H}$ , U400, 400 MHz,  
23 °C,  $\text{CDCl}_3$

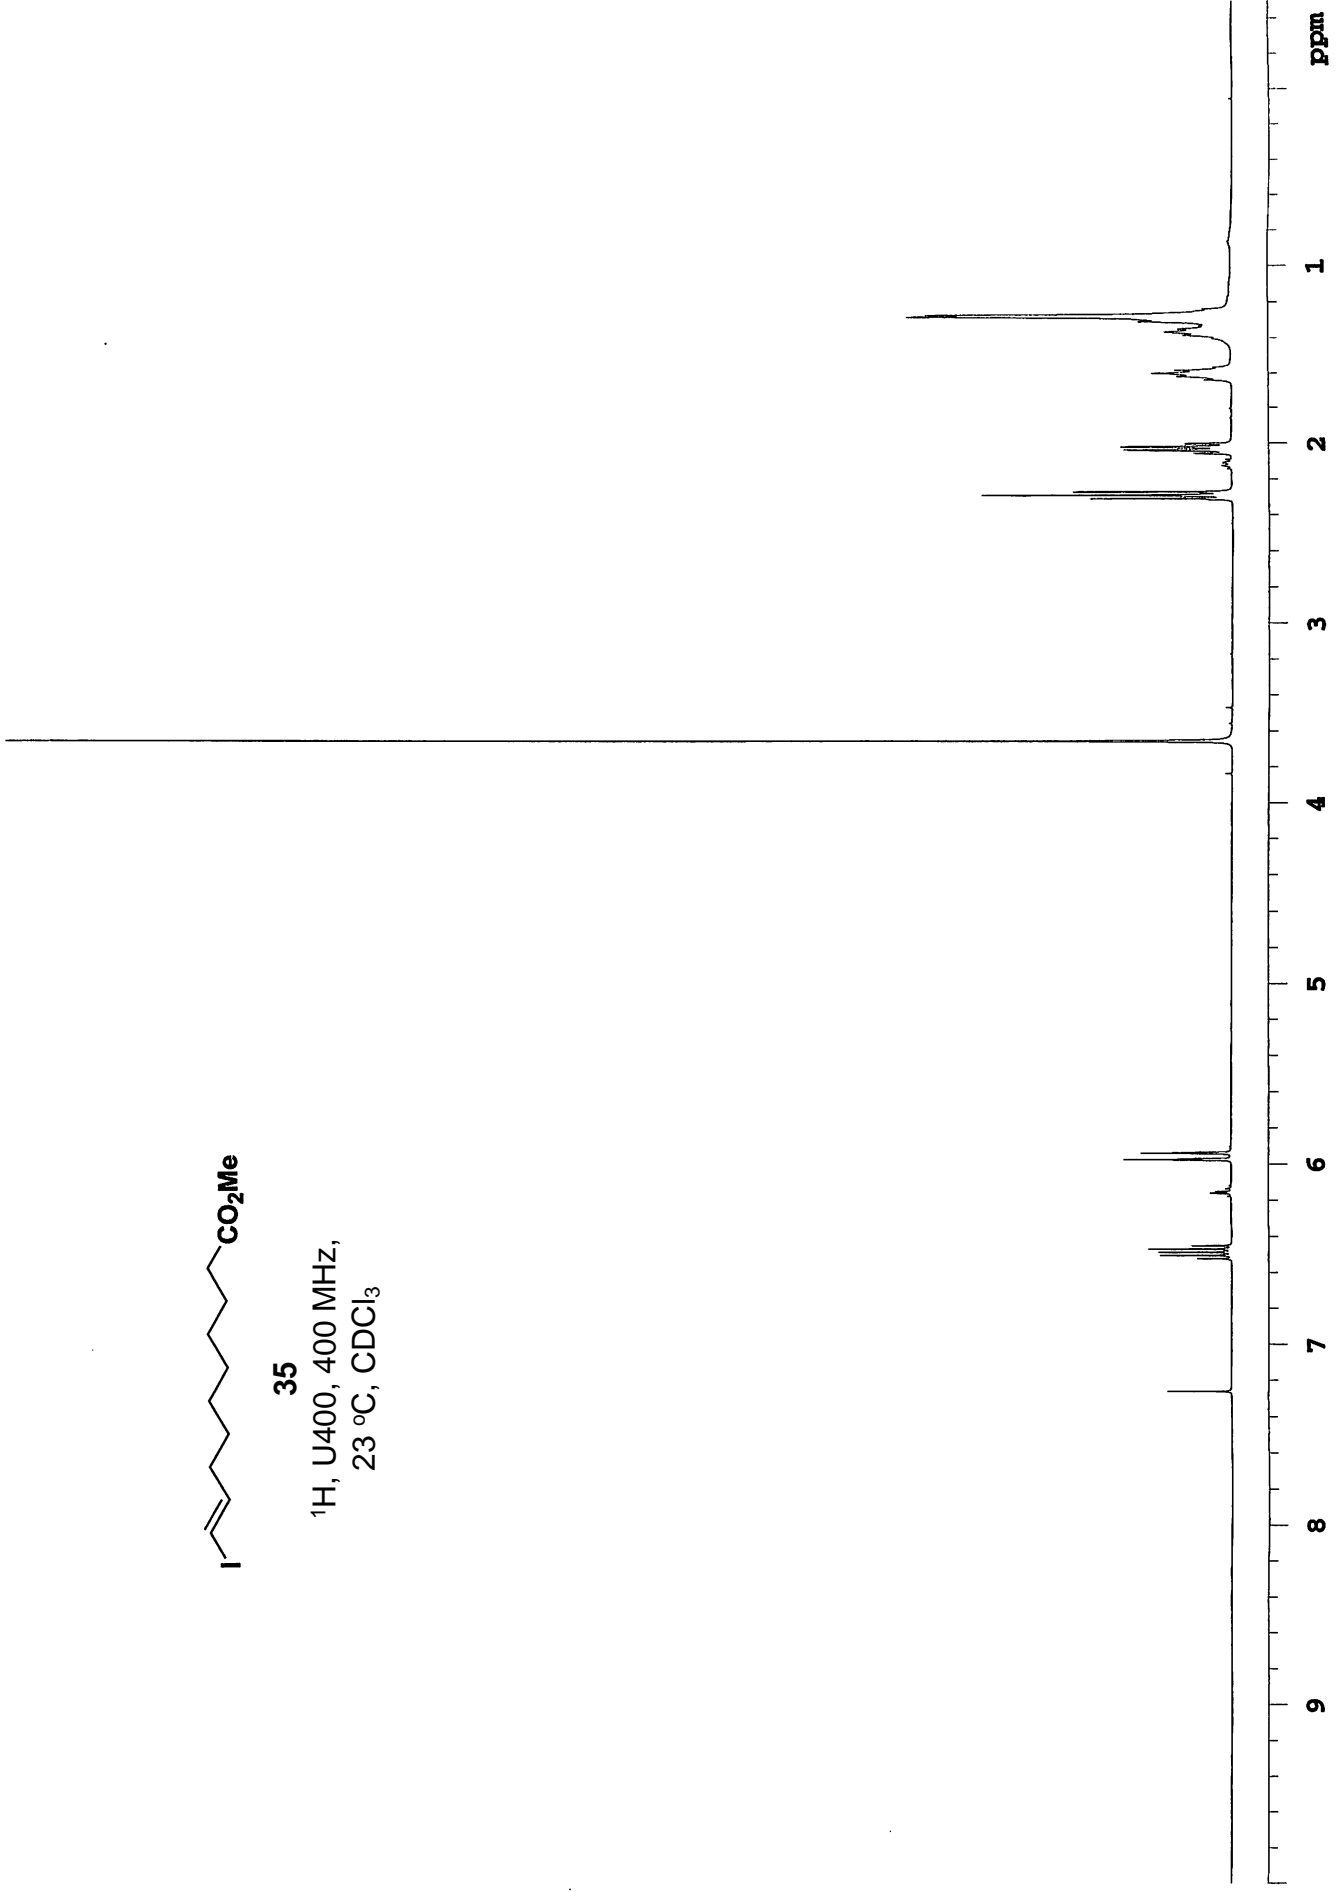

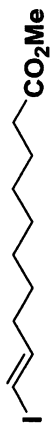

35

$^{13}\text{C}$ , U400, 100 MHz,  
23 °C,  $\text{CDCl}_3$

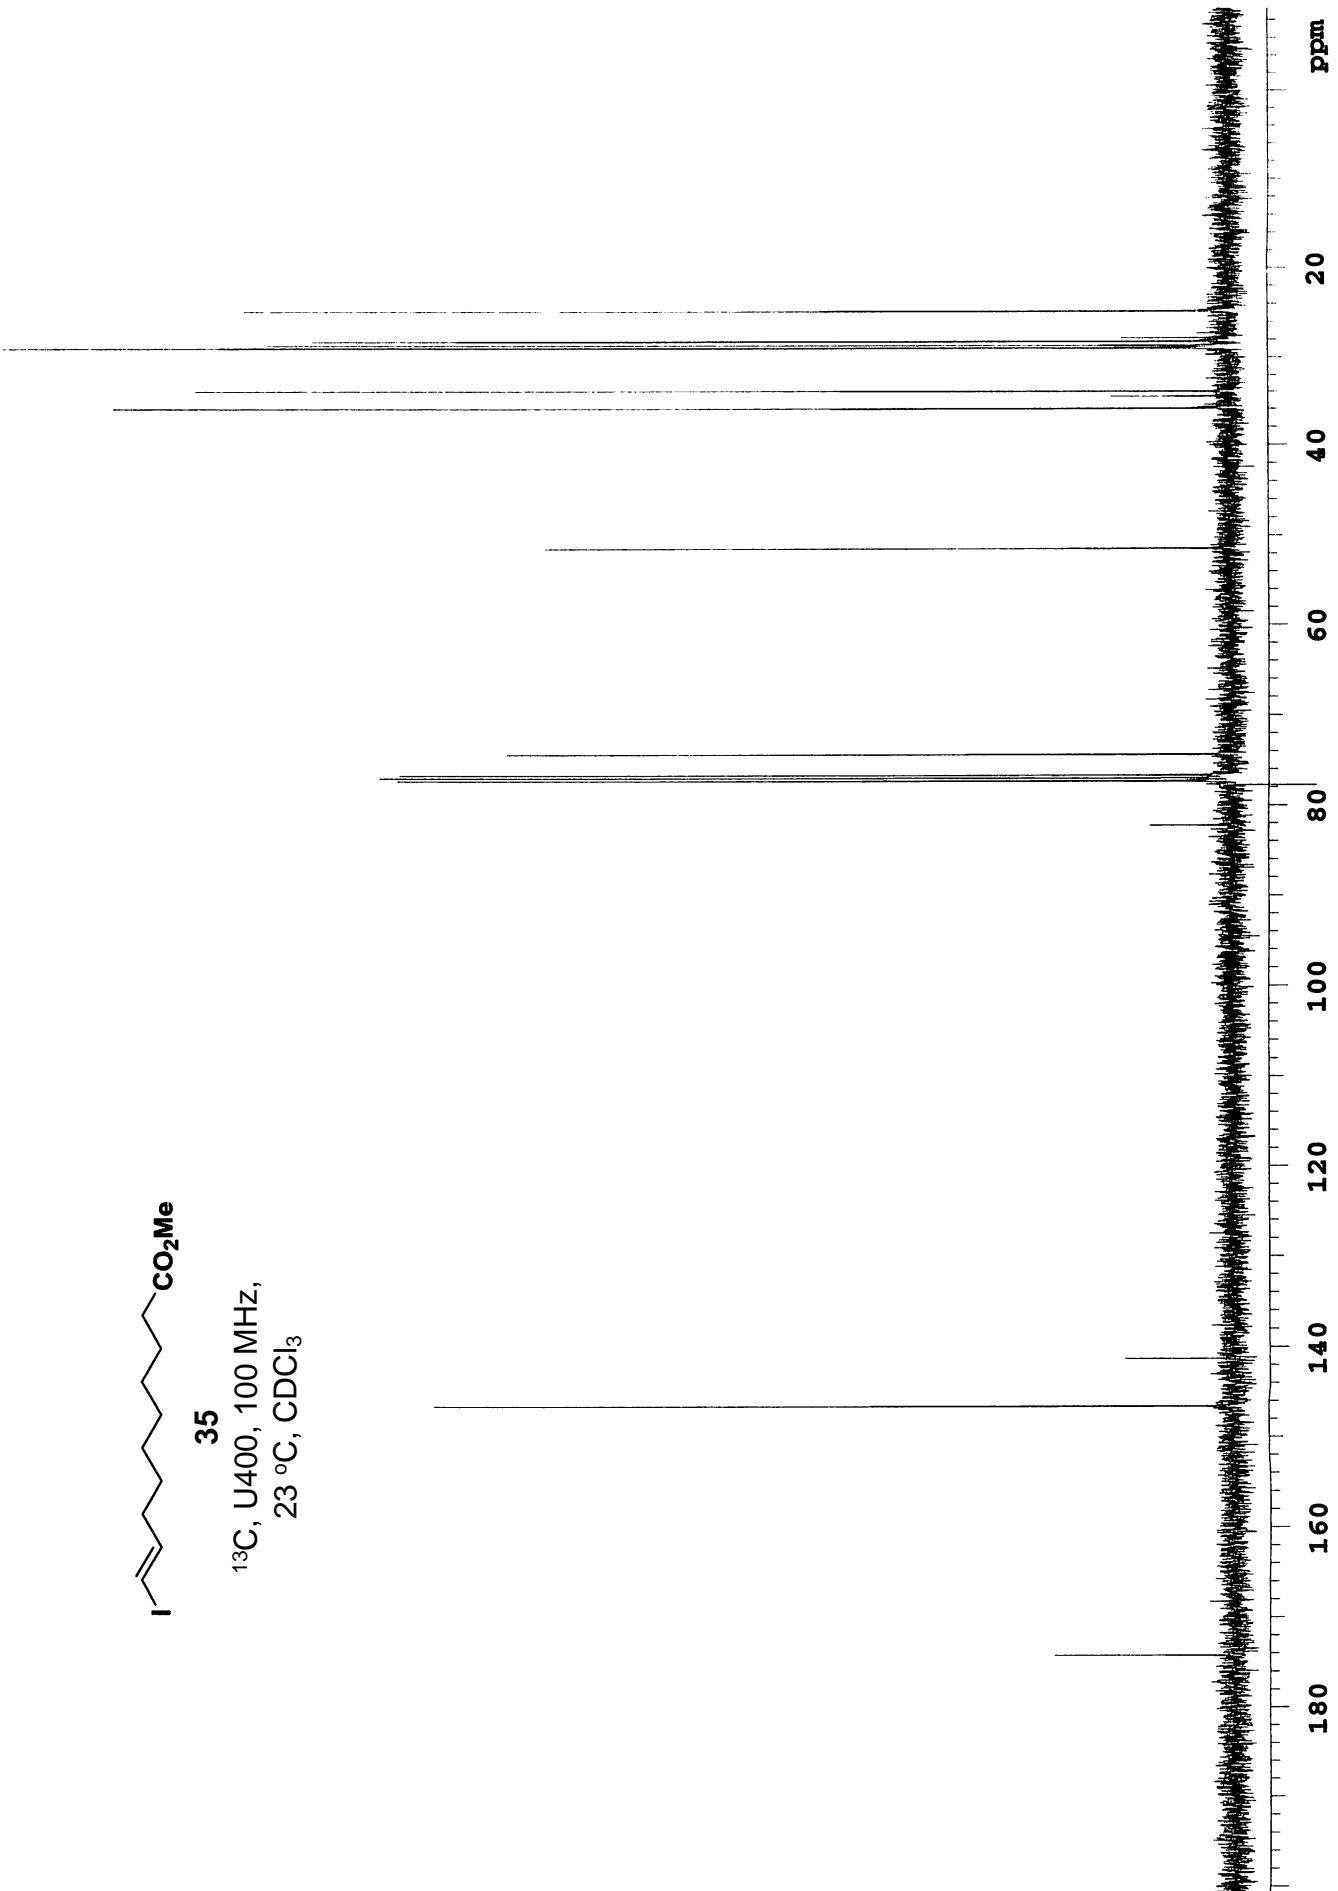

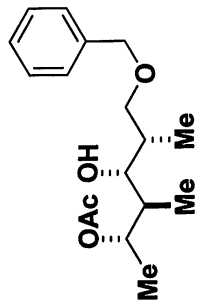

38

$^1\text{H}$ , U400, 400 MHz,  
23 °C,  $\text{CDCl}_3$

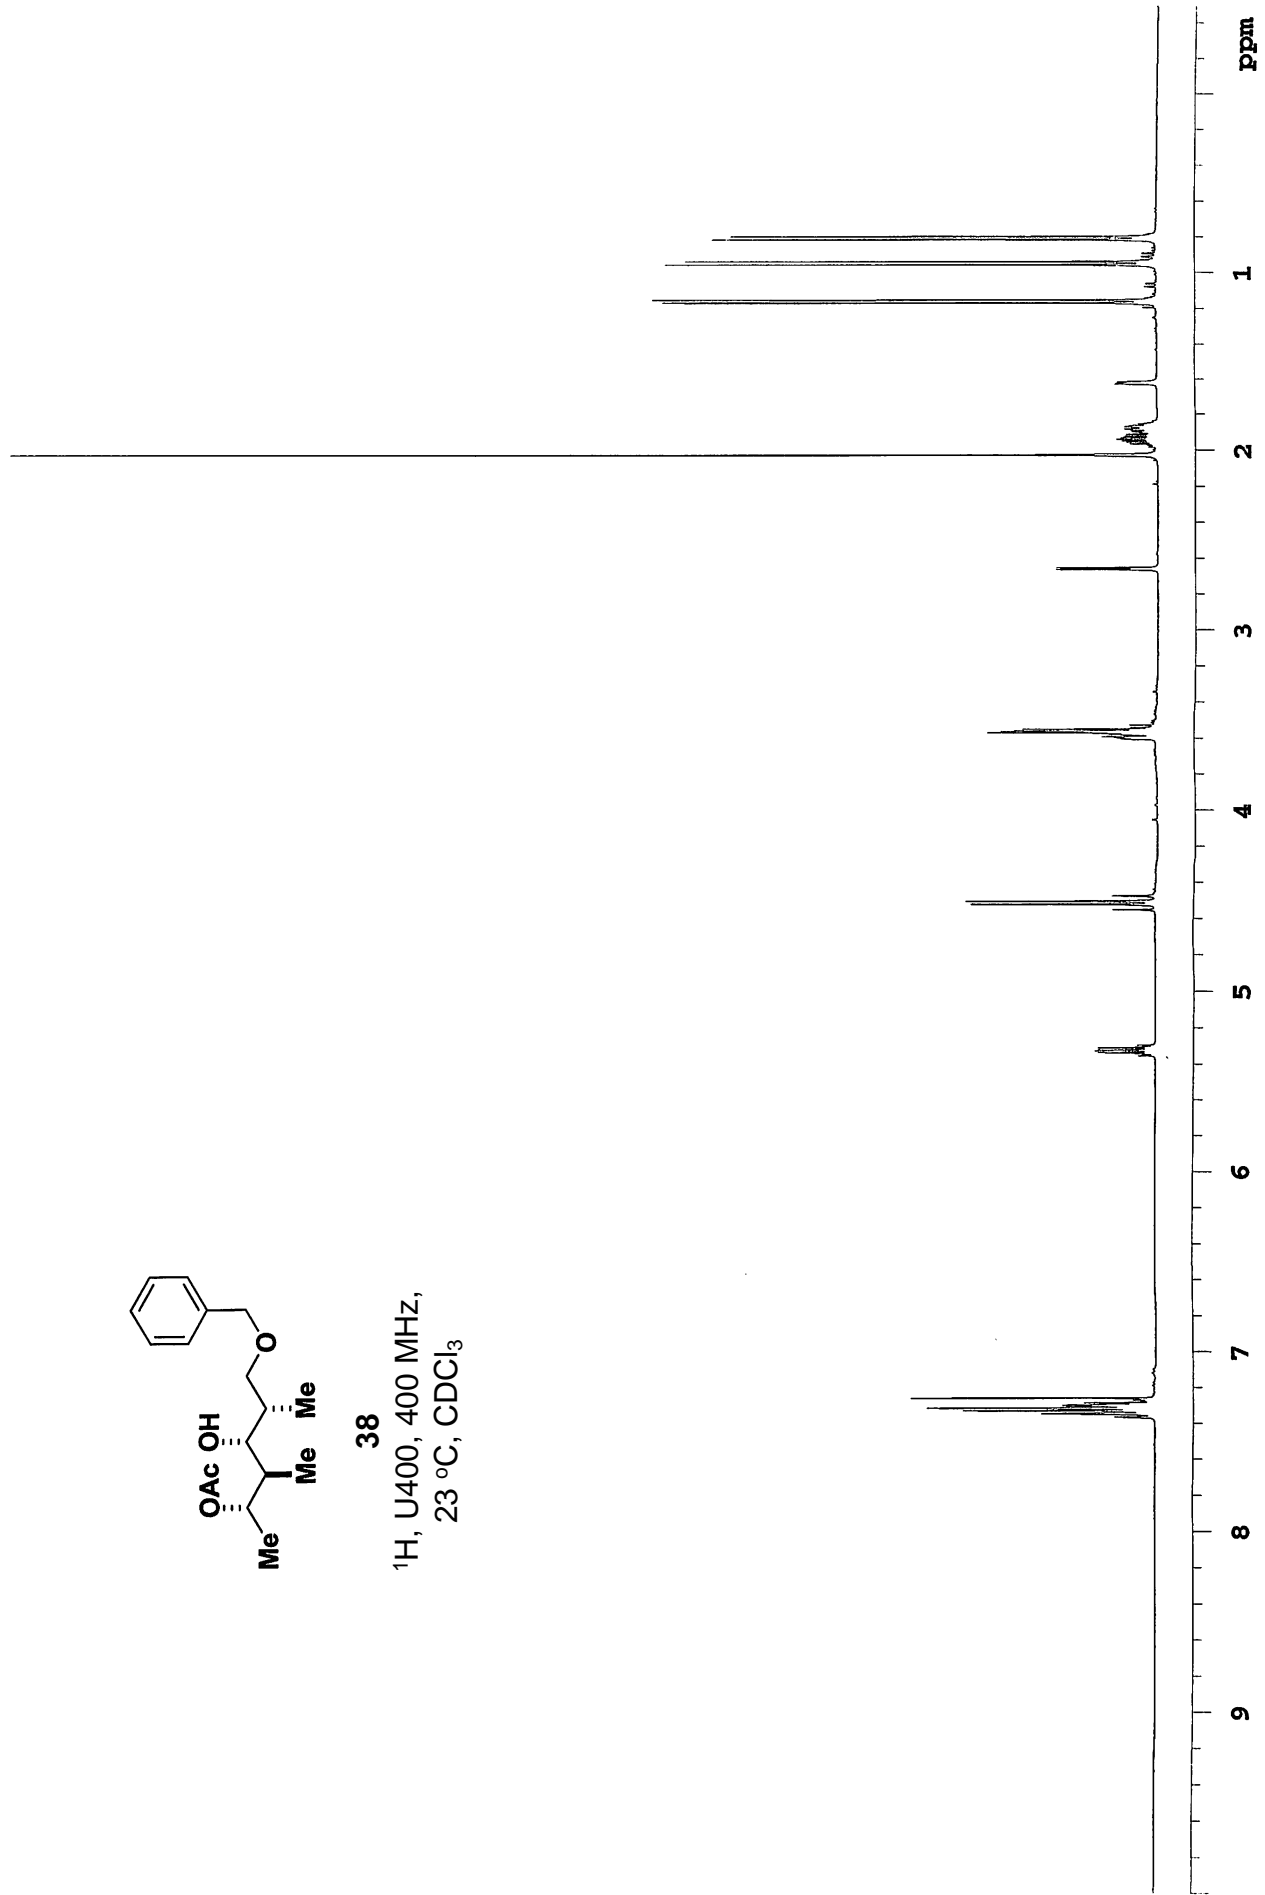

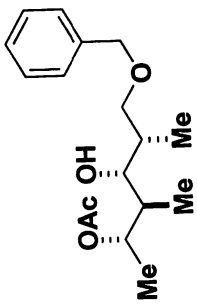

38

$^{13}\text{C}$ , U400, 100 MHz,  
23 °C,  $\text{CDCl}_3$

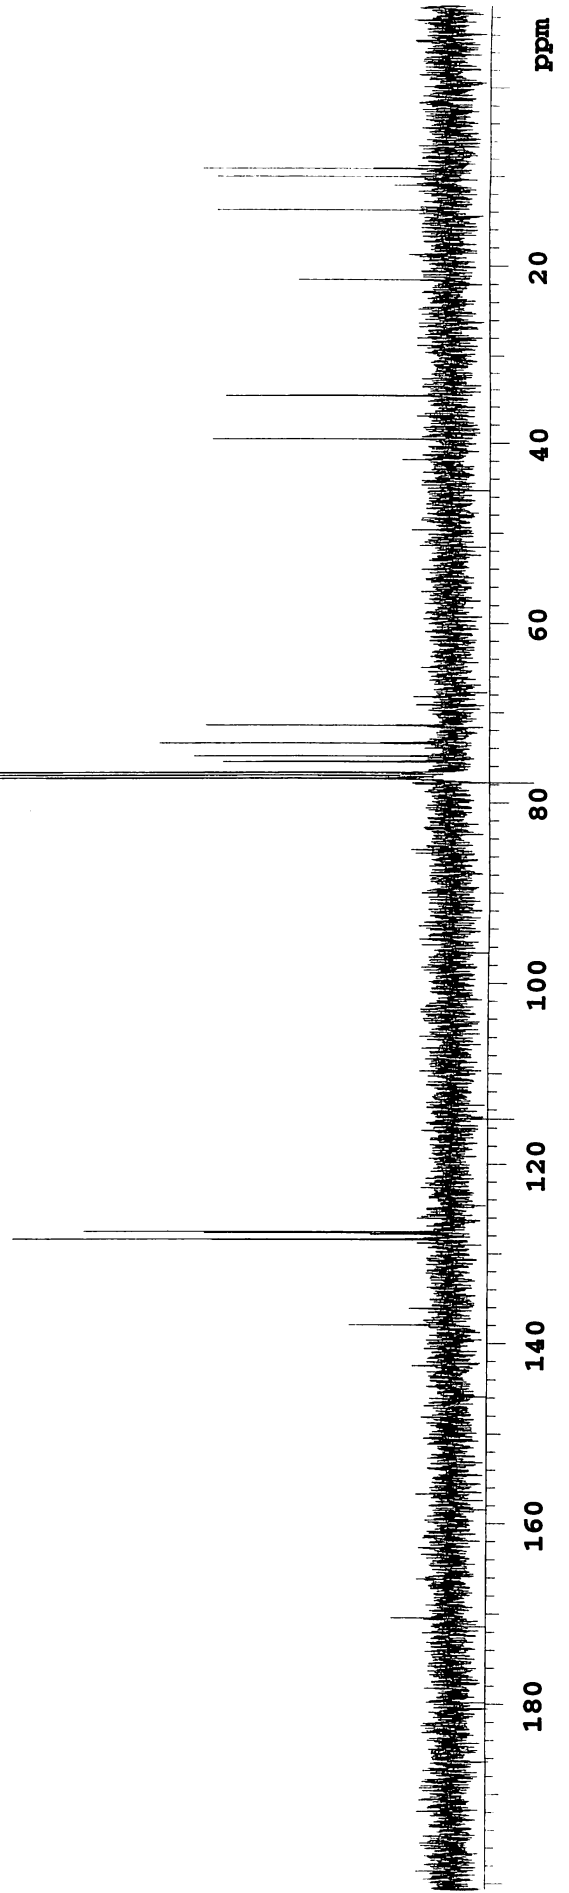



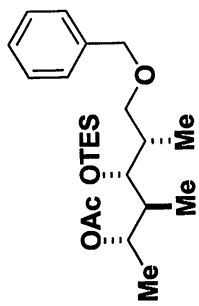

39

$^1\text{H}$ , VXR500, 500 MHz,  
23 °C,  $\text{CDCl}_3$

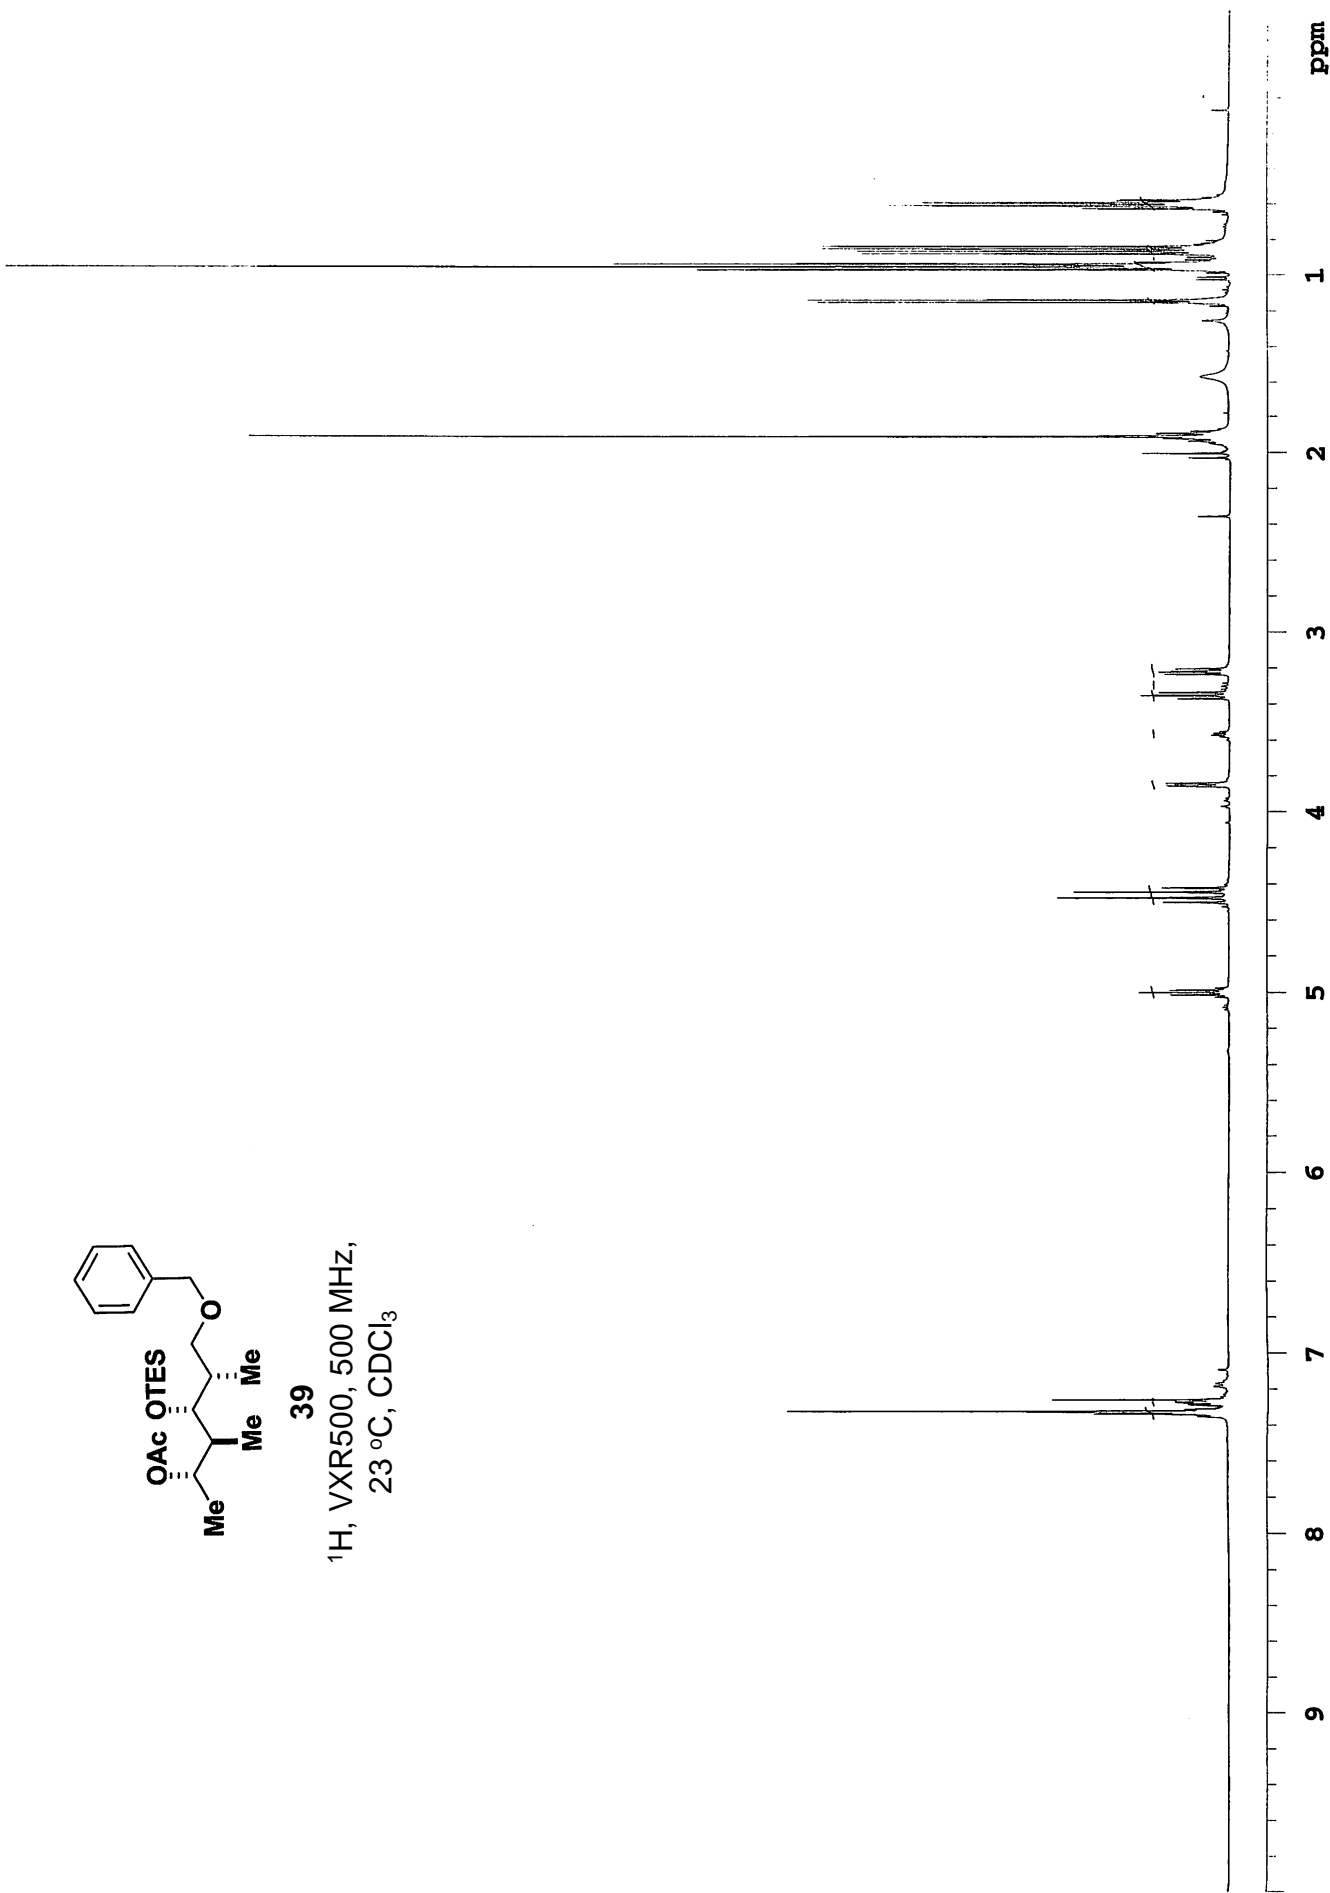

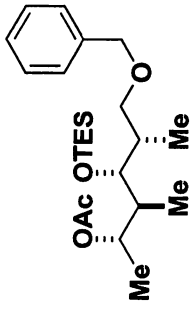

39

$^{13}\text{C}$ , VXR500, 125 MHz,  
23 °C,  $\text{CDCl}_3$

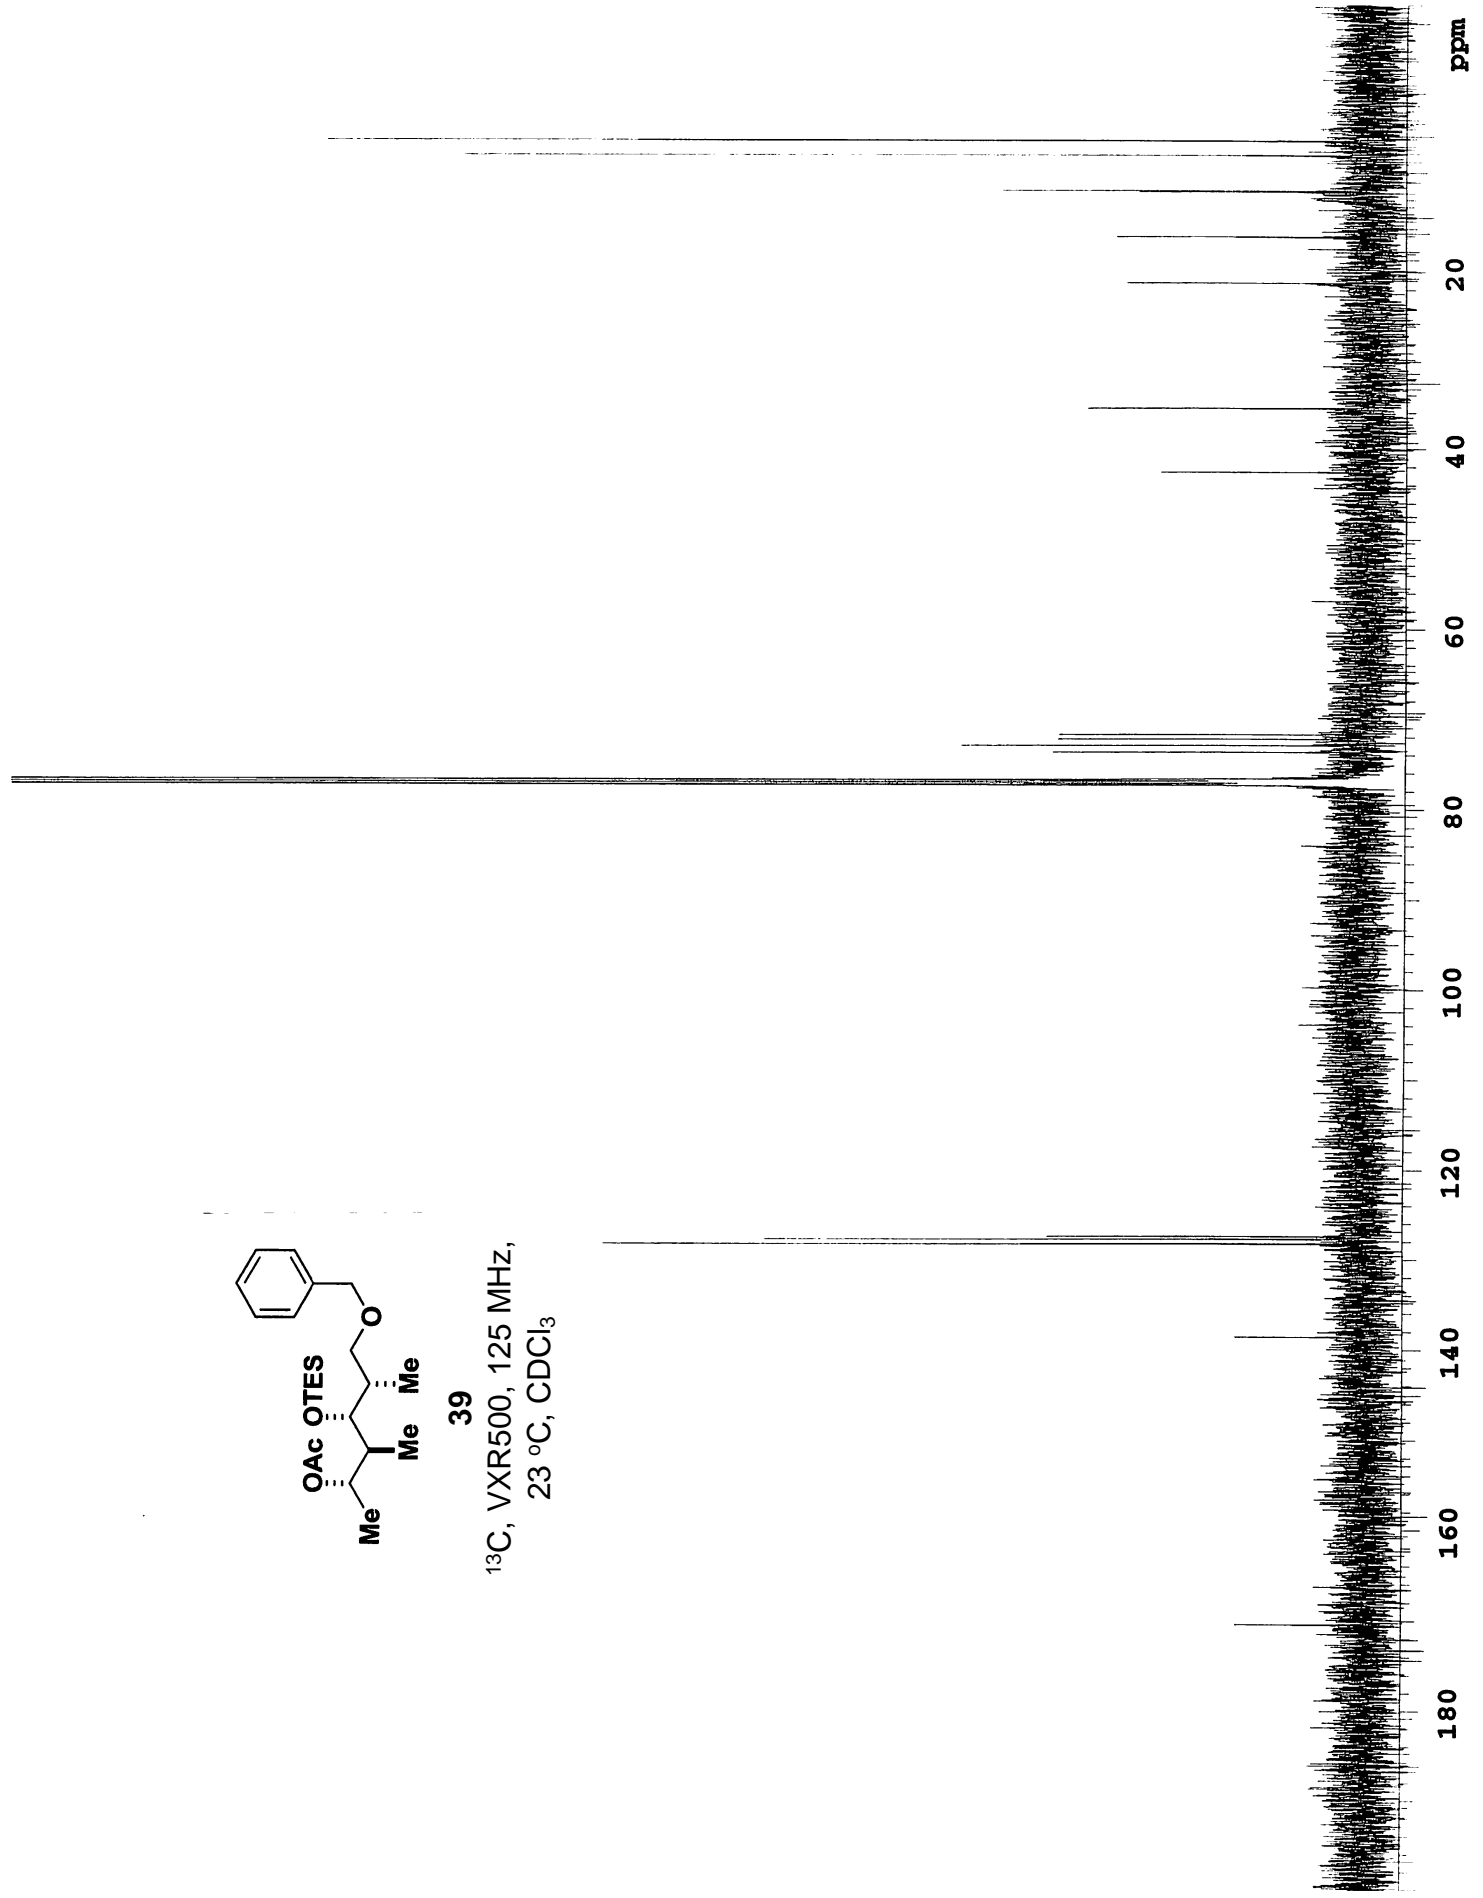

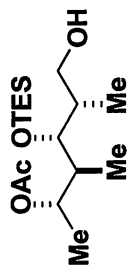

40

$^1\text{H}$ , VXR500, 500 MHz,  
23 °C,  $\text{CDCl}_3$

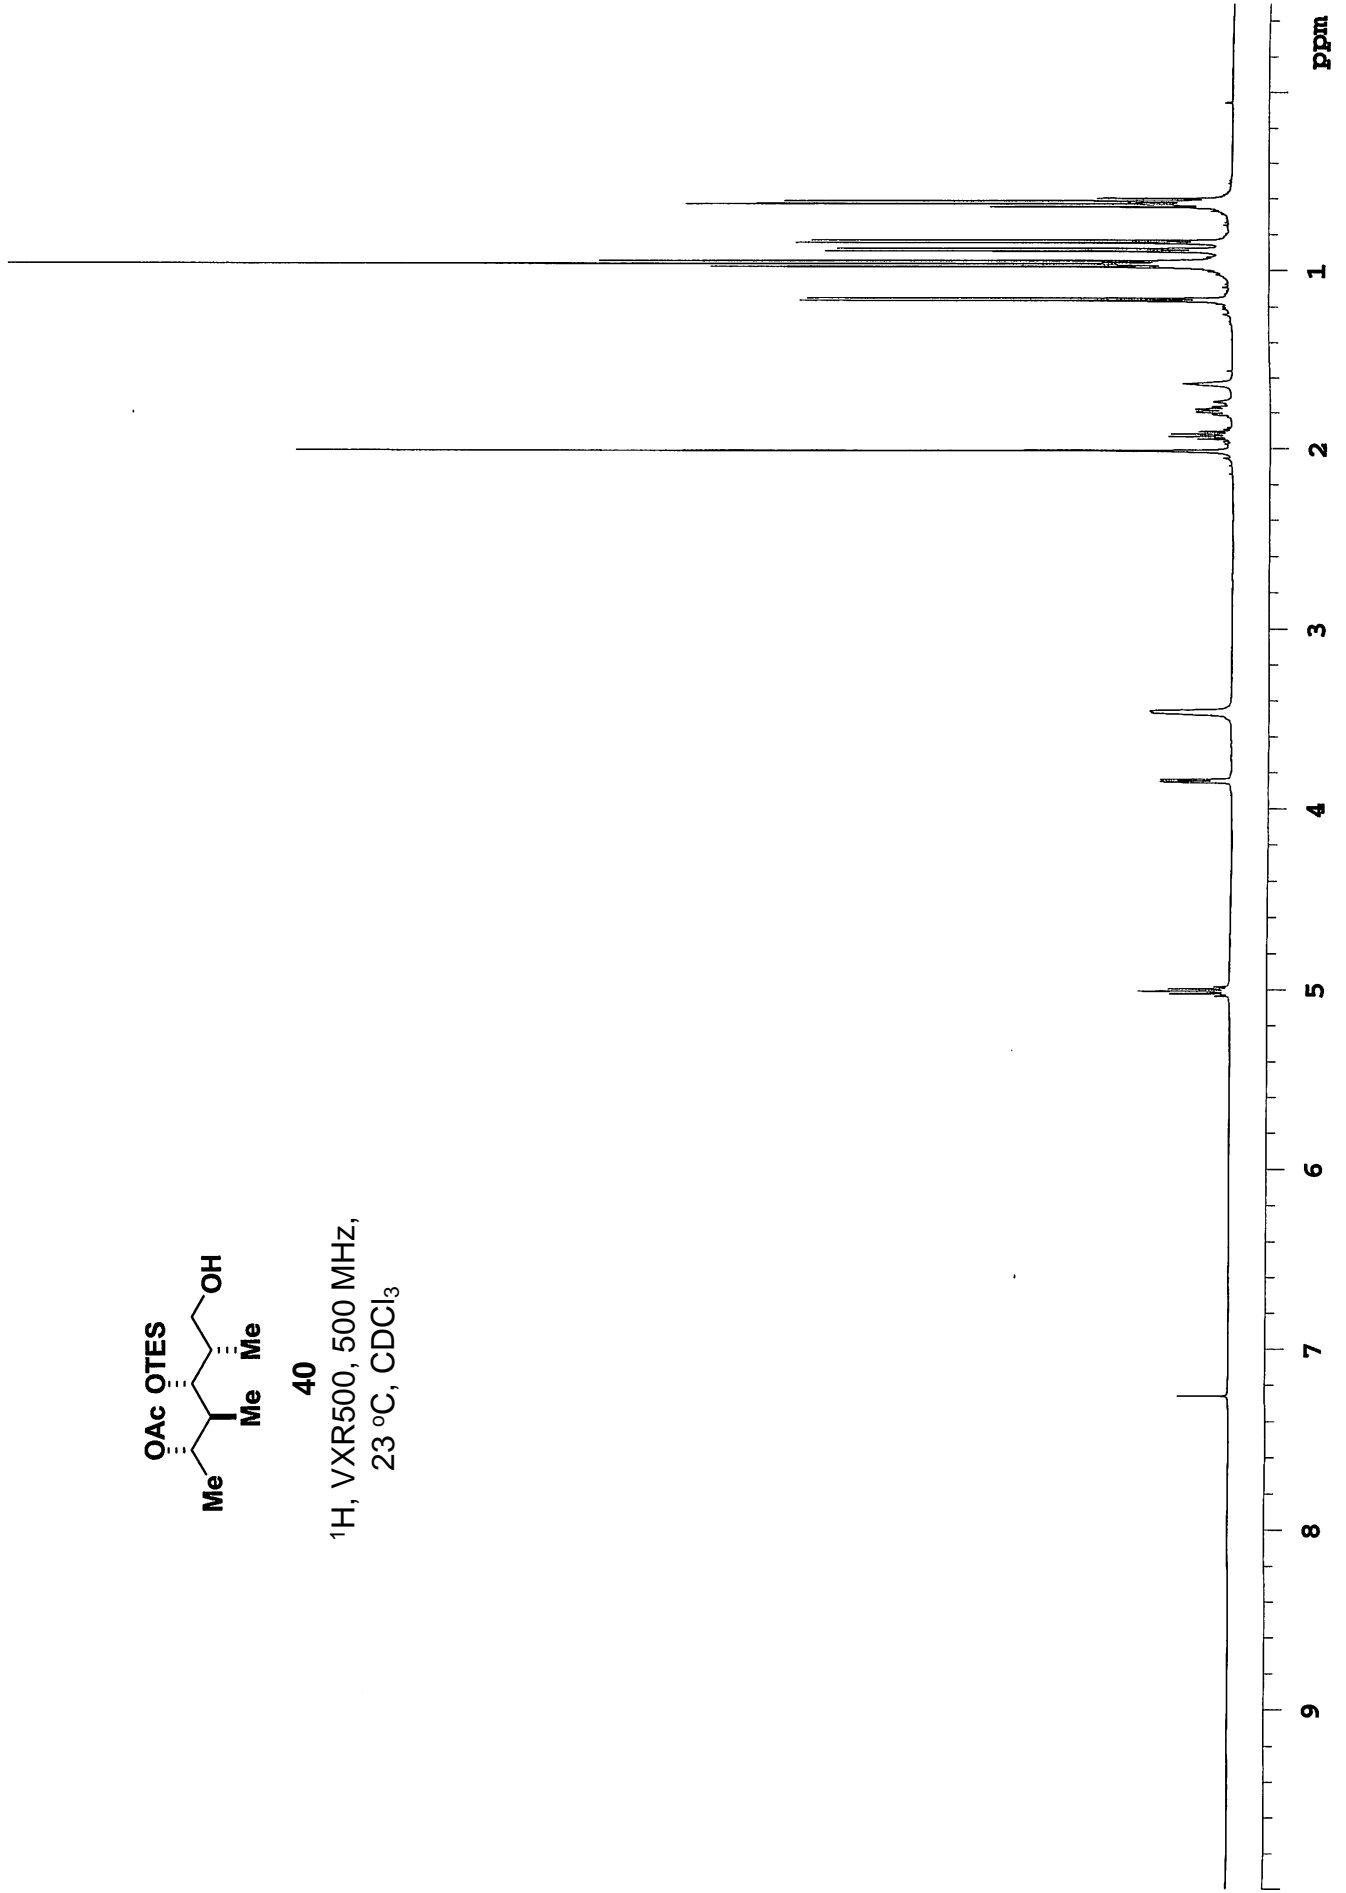

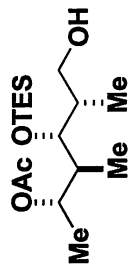

40

<sup>13</sup>C, VXR500, 125 MHz,  
23 °C, CDCl<sub>3</sub>

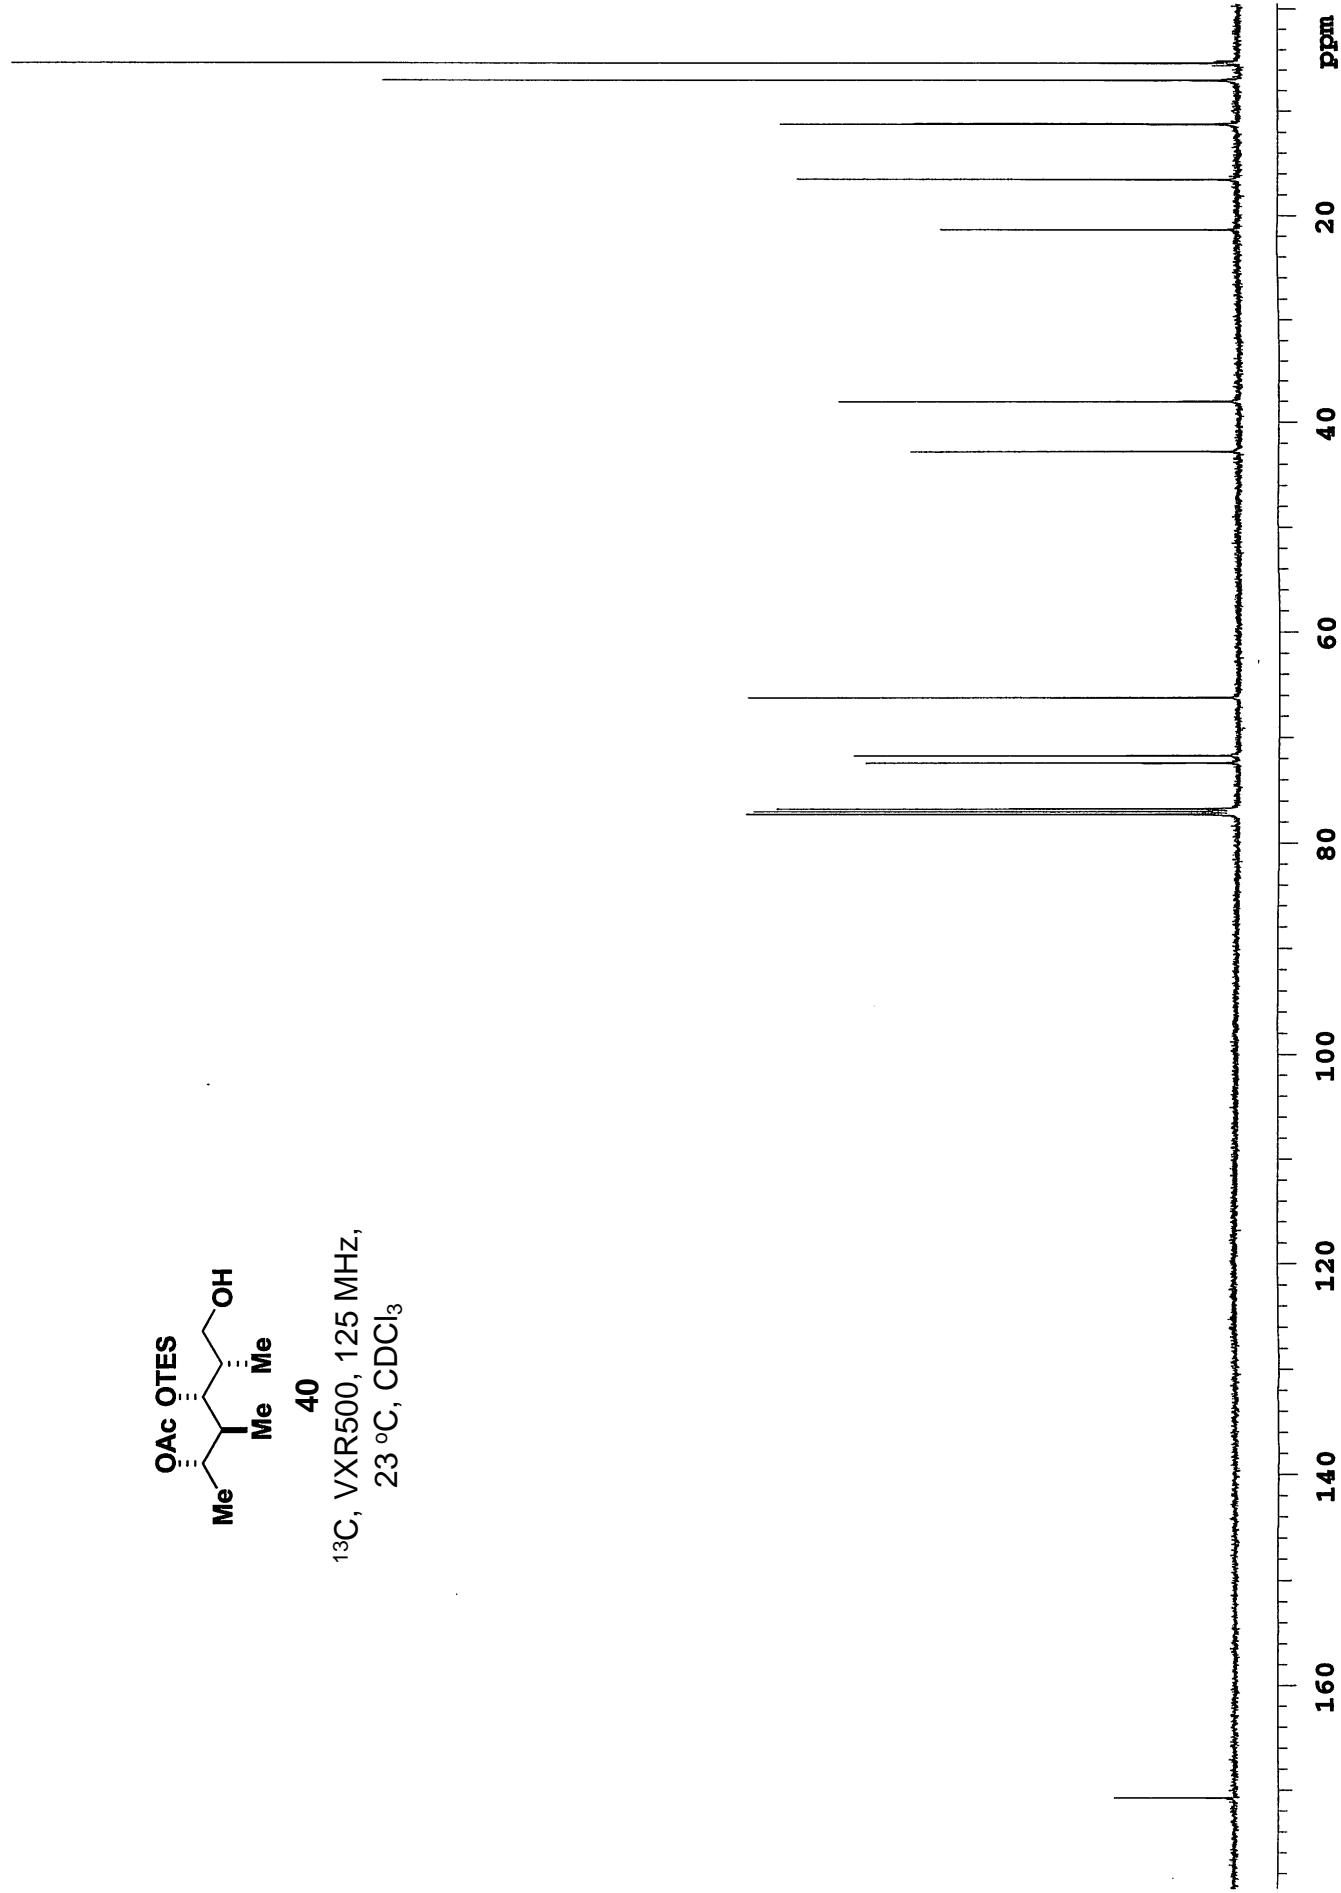

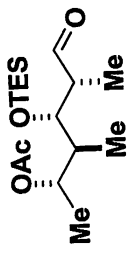

41

<sup>1</sup>H, U400, 400 MHz,  
23 °C, CDCl<sub>3</sub>

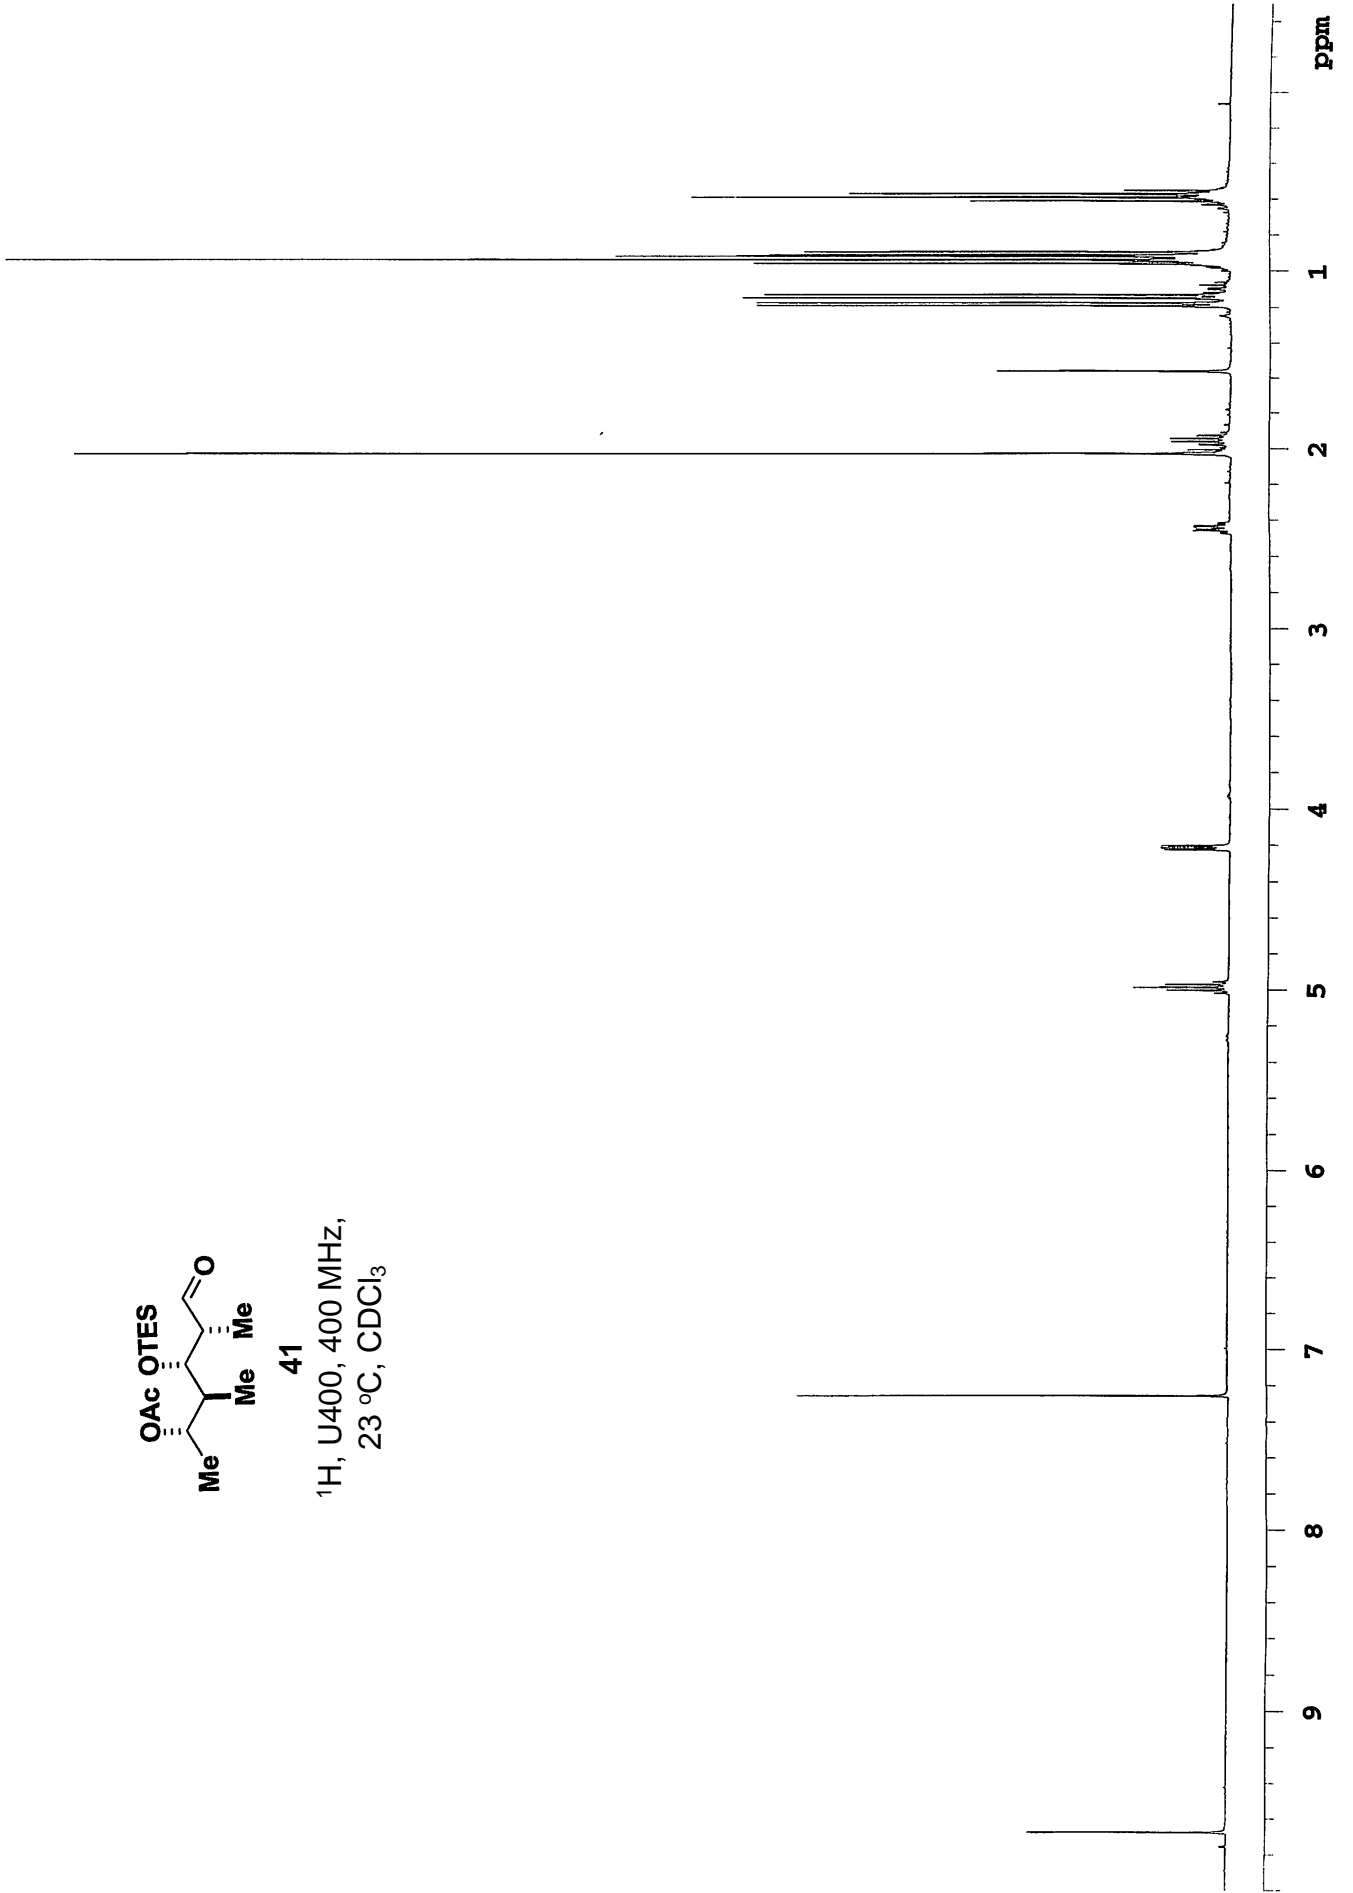

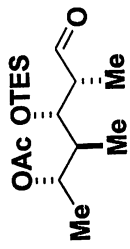

41

$^{13}\text{C}$ , VXR500, 125 MHz,  
23 °C,  $\text{CDCl}_3$

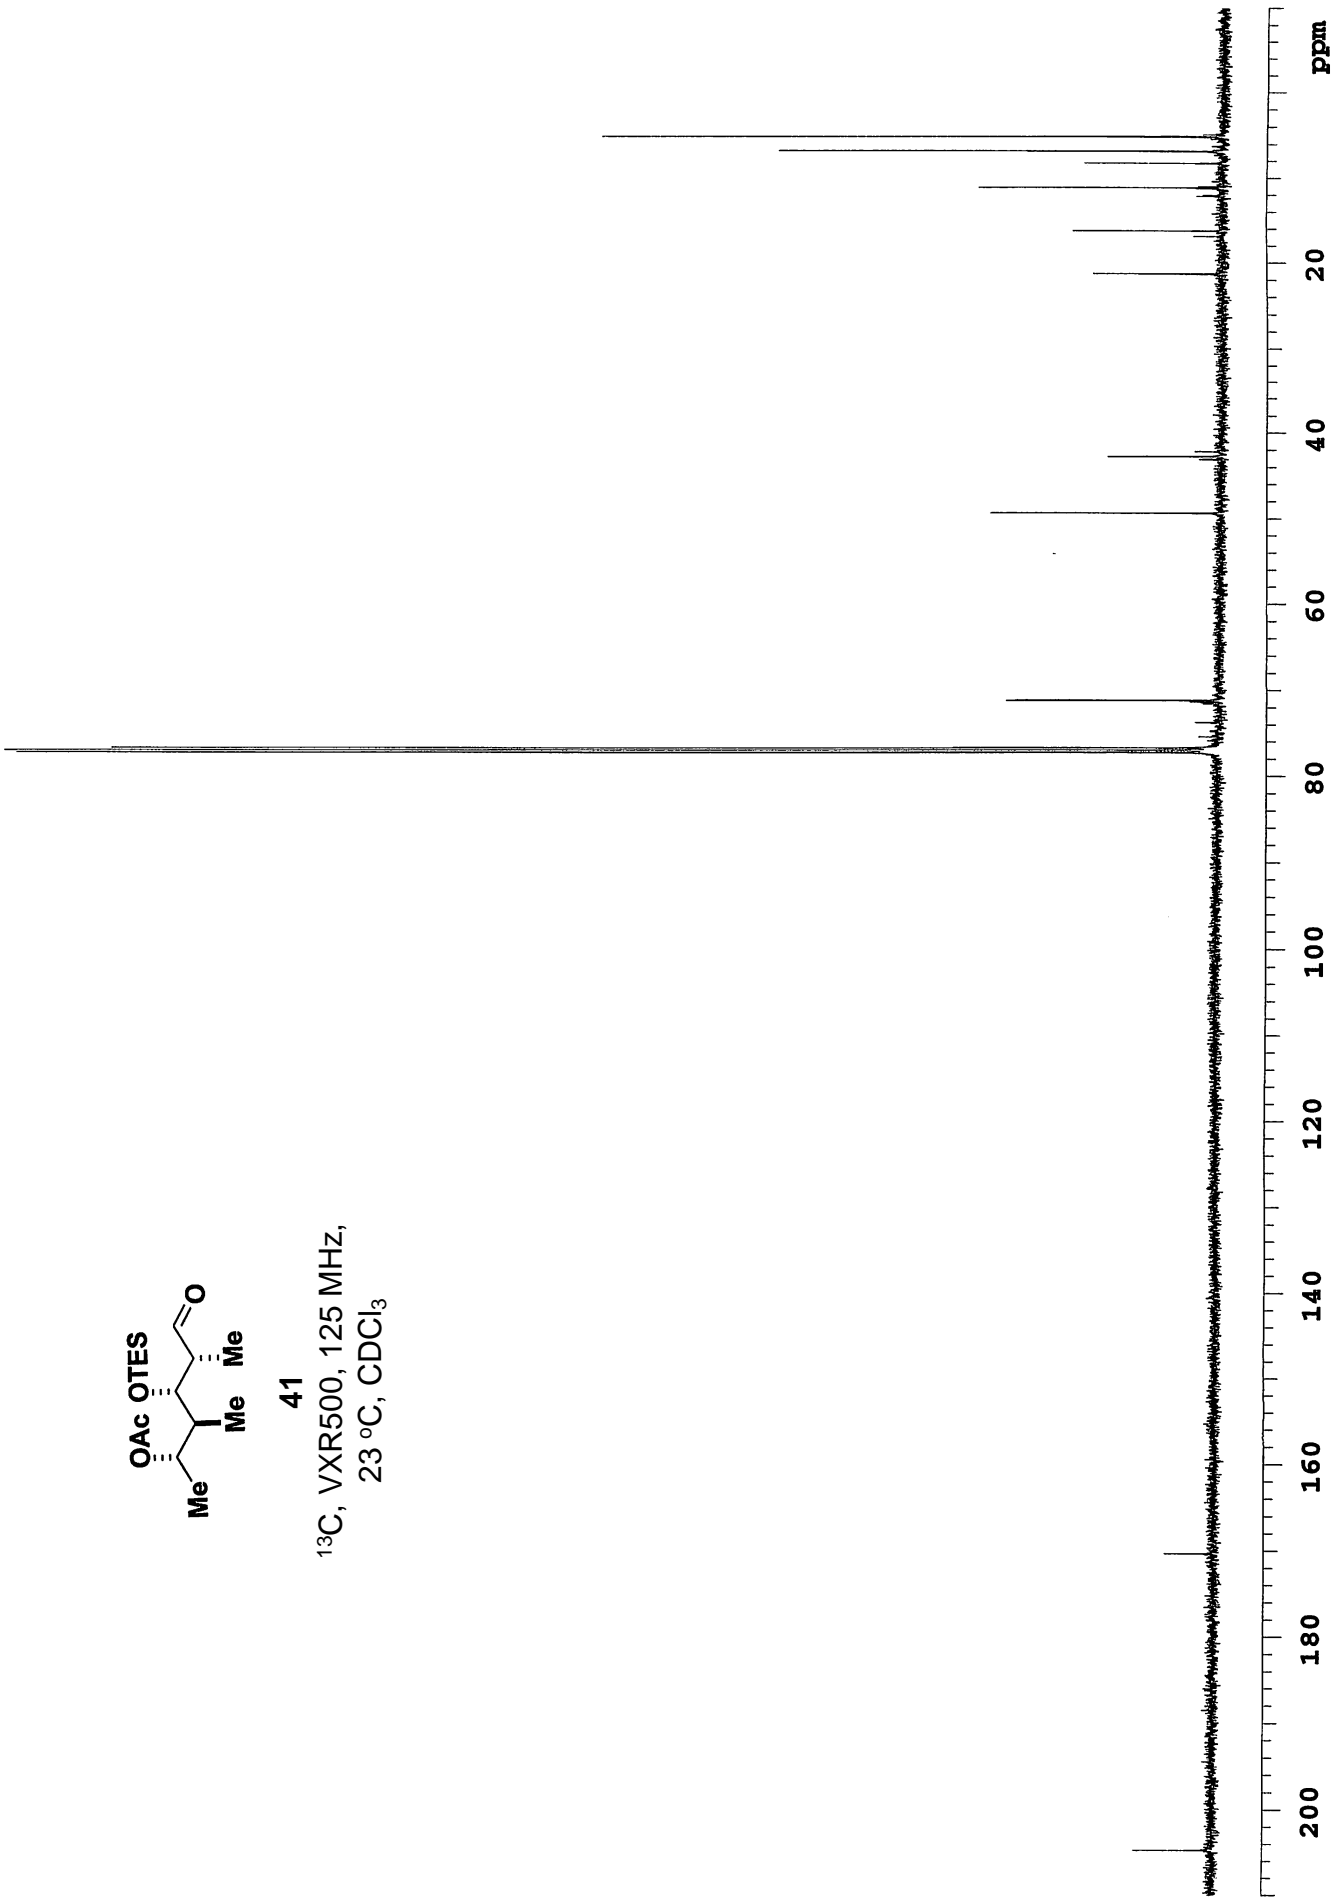

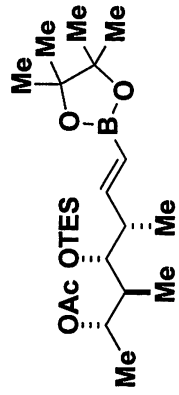

43

$^1\text{H}$ , U400, 400 MHz,  
23 °C,  $\text{CDCl}_3$

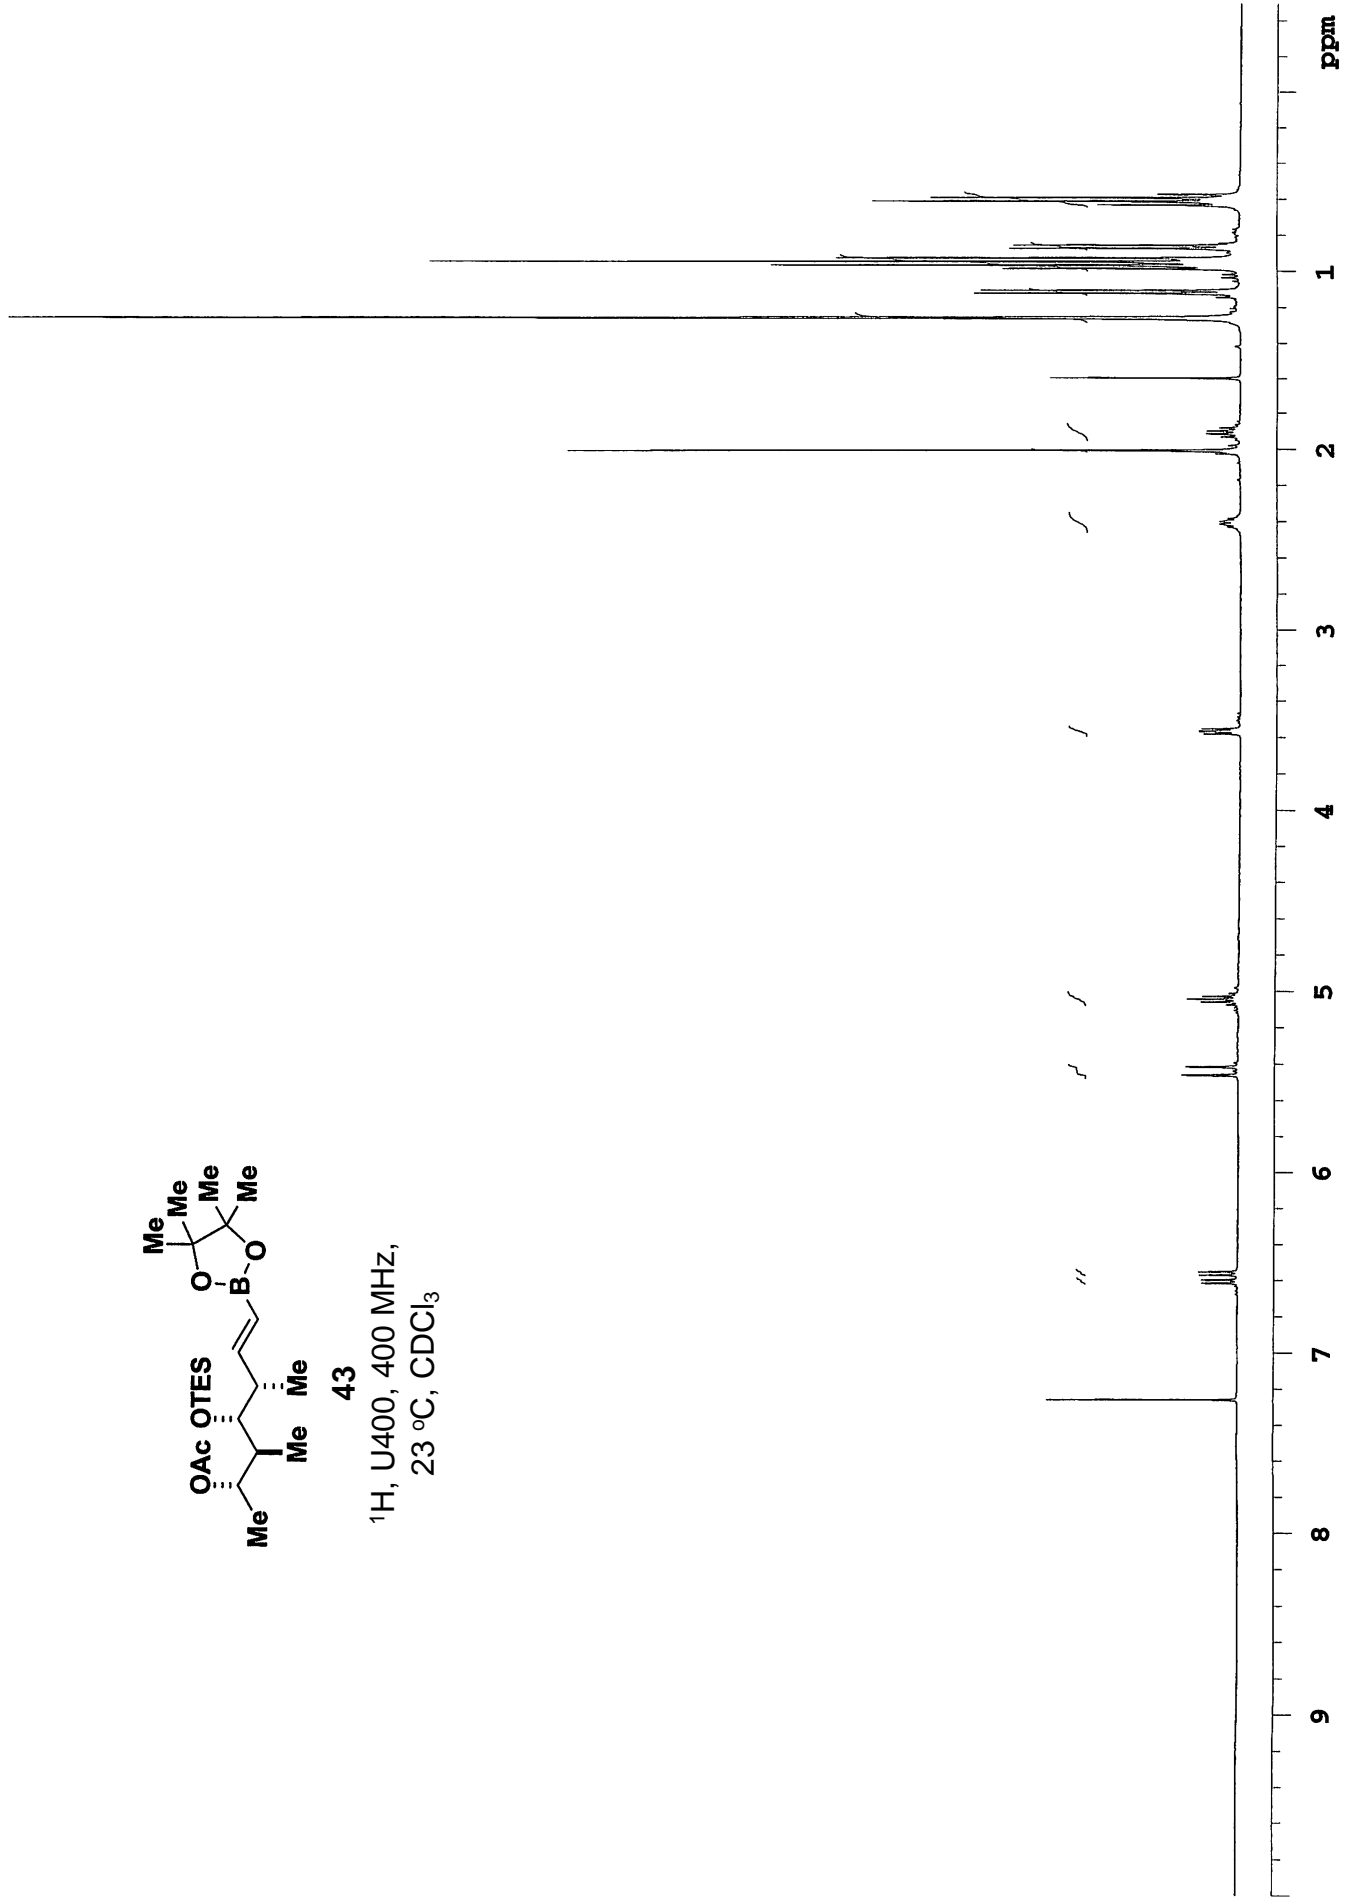

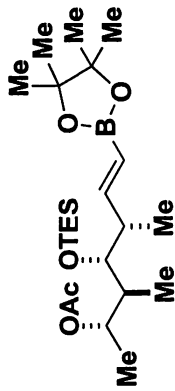

43

$^{13}\text{C}$ , U400, 100 MHz,  
23 °C,  $\text{CDCl}_3$

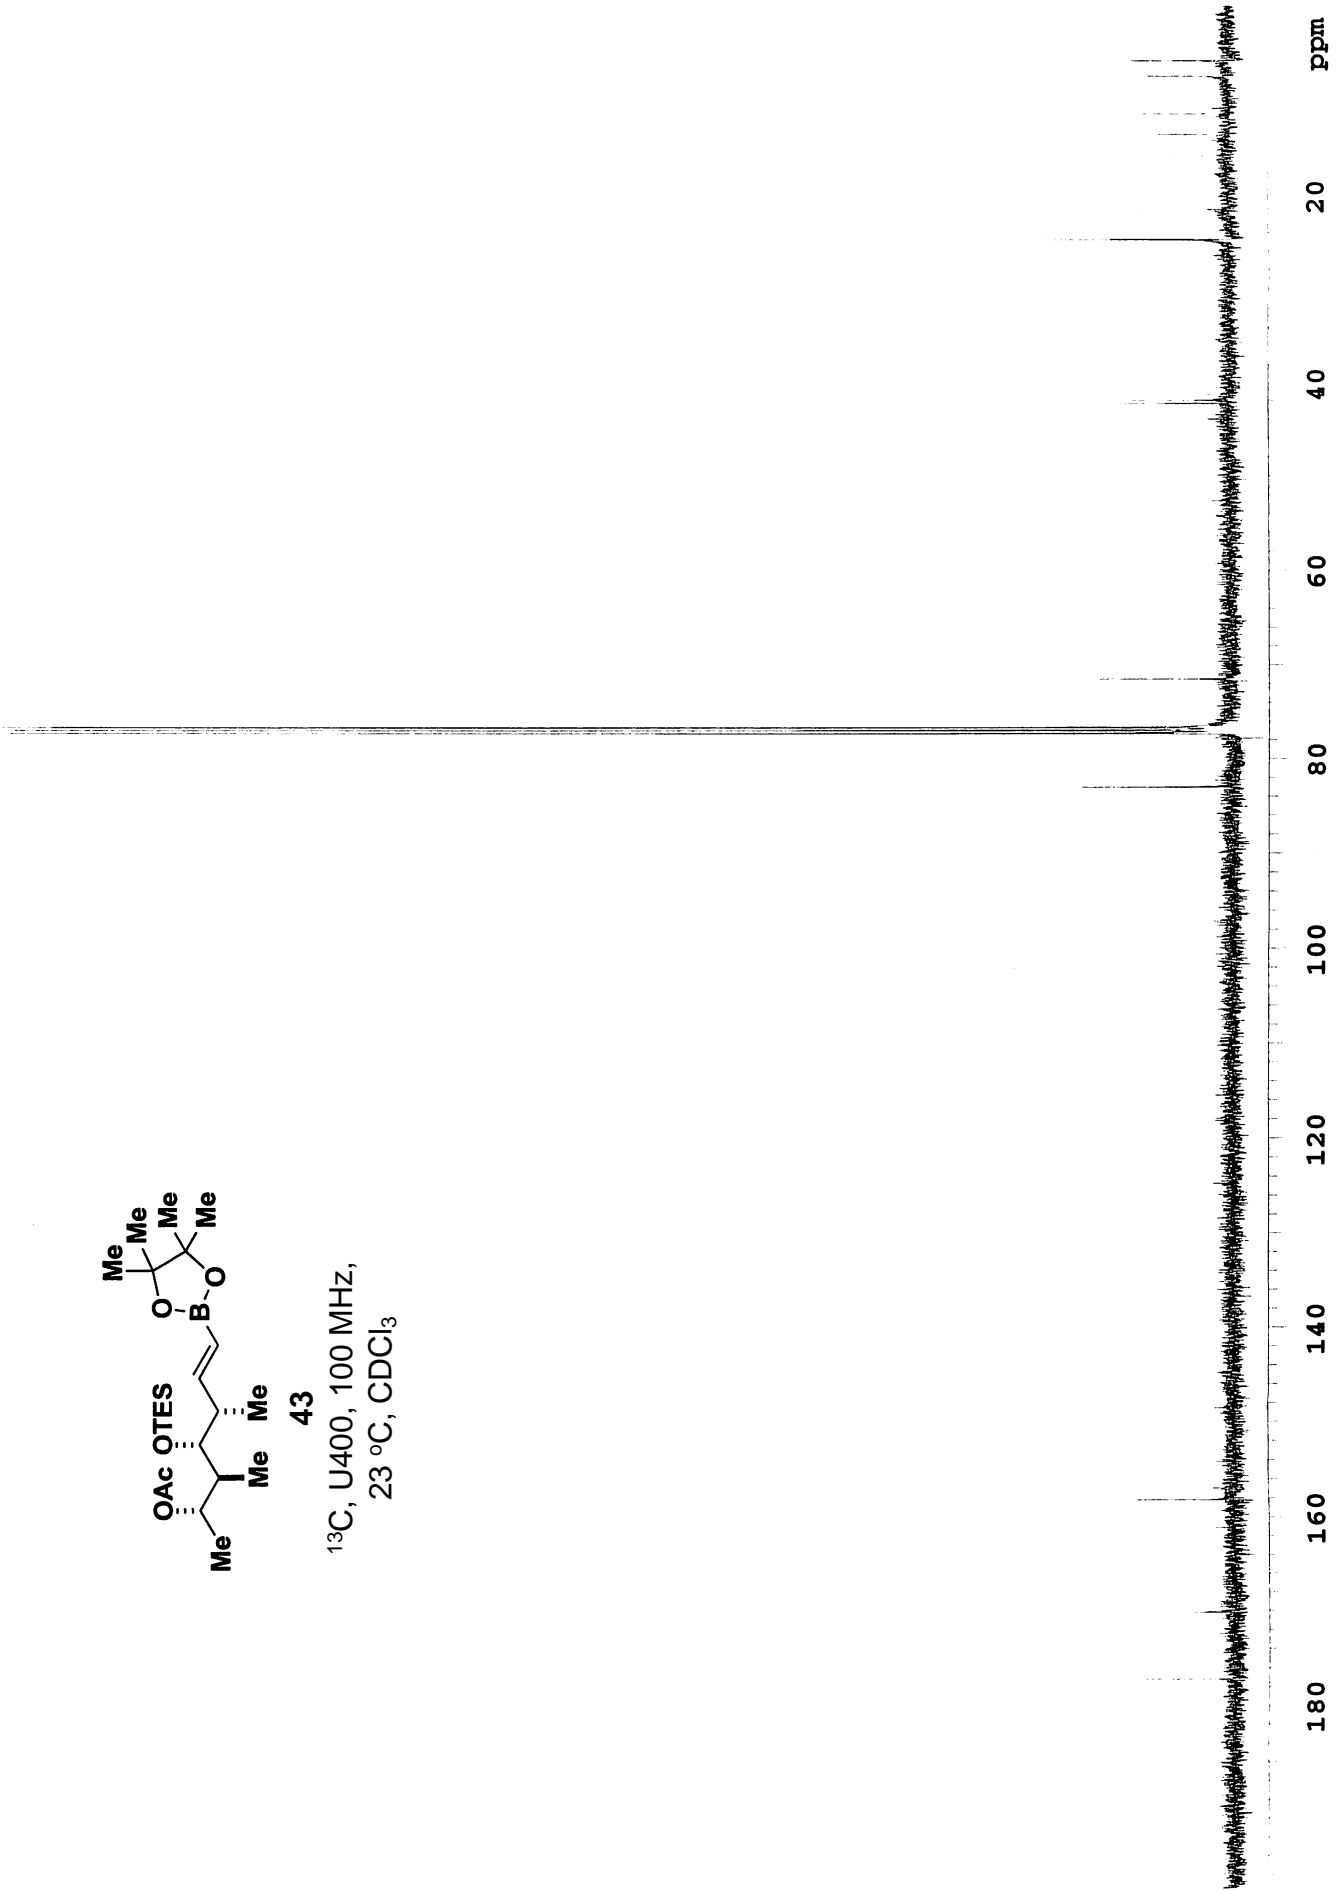

Supplement: NIHMS62853-supplement-2_SI_B_revised.pdf [file NIHMS62853-supplement-2_SI_B_revised.pdf]
